# Supplementary material for: Microbiota-mediated nitrogen fixation and homeostasis in aerial root-mucilage
Source: Research Square preprint supplement (doi:10.21203/rs.3.rs-1761850/v1), 2022-06-24
Supplement: Supplementary file 1 [file 4822f01745bc2ed56ce8aad2.xlsx]

## Sheet: Table. S6-1
Table. S6-1 Repeat sequence statistics
Type	Repeat Size	% of genome
Trf	6024910	3.51
Repeatmasker	1007045	0.59
Proteinmask	7748481	4.52
De novo	37826250	22.06
Total	40352042	23.54

## Sheet: Table. S6-2
Table. S6-2 Statistics of repetitive sequence classification results
Type	RepeatMasker TEs Length (Bp)	RepeatMasker TEs % in genome	RepeatProteinMask TEs Length (Bp)	RepeatProteinMask TEs % in genome	De novo Length (Bp)	De novo % in genome	Combined TEs Length (Bp)	Combined TEs % in genome
DNA	117996	0.07	396	0	3956785	2.31	4063369	2.37
LINE	24666	0.01	1734	0	805683	0.47	829585	0.48
SINE	2581	0	0	0	120742	0.07	123323	0.07
LTR	856553	0.5	7746351	4.52	26330201	15.36	27046250	15.78
Other	0	0	0	0	0	0	0	0
Unknown	2016	0	0	0	7741262	4.52	7743278	4.52
Total TE	991712	0.58	7748481	4.52	37449890	21.84	38256597	22.31

## Sheet: Table. S6-3
Table. S6-3 Basic Statistical Results of Gene Prediction
Gene set	Number	Average gene length (bp)	Average CDS length (bp)	Average exon per gene	Average exon length (bp)	Average intron length (bp)
denovo/AUGUSTUS	28879	2493.4	1383.91	5.8	238.63	231.17
denovo/GlimmHMM	42433	2131.28	990.67	3.64	272.38	432.52
homo/A.thaliana	34444	1964.11	918.71	4.3	213.8	317.07
homo/O.sativa	32687	2051.38	878.34	4.16	211.21	371.38
homo/N.tabacum	34871	1959.13	916.17	4.14	221.31	332.18
homo/Z.mays	32615	1987.73	878.17	4.16	211.19	351.33
trans.orf/RNAseq	19477	3463.12	1316.94	6.38	354.29	223.81
MAKER	29912	2910.67	1270.18	5.77	313.5	230.68
PASA	29572	3049.26	1254.05	5.75	337.48	233.24

## Sheet: Table. S6-4
Table. S6-4 Evidence statistics for the final gene set
	>=20% overlap No.	>=20% overlap Ratio(%)	>=50% overlap No.	>=50% overlap Ratio(%)	>=80% overlap No.	>=80% overlap Ratio(%)
P(single)	37	0.13	316	1.07	1463	4.95
P(more)	922	3.12	1595	5.39	2570	8.69
H(single)	17	0.06	20	0.07	43	0.15
H(more)	55	0.19	86	0.29	149	0.5
C(single)	368	1.24	622	2.1	1784	6.03
C(more)	0	0	0	0	0	0
PH	4596	15.54	4714	15.94	3696	12.5
PC	2383	8.06	3682	12.45	6736	22.78
HC	383	1.3	489	1.65	994	3.36
PHC	20811	70.37	18042	61.01	11982	40.52

## Sheet: Table. S6-5
Table. S6-5 Feature Annotation Statistics
	Number	Percent(%)
Total	29572
InterPro	25125	84.96
GO	17746	60.01
KEGG_ALL	28495	96.36
KEGG_KO	11591	39.2
Swissprot	22586	76.38
TrEMBL	28505	96.39
NR	28527	96.47
Annotated	28583	96.66
Unannotated	989	3.34

## Sheet: Table. S6-6
Table. S6-6 Statistics of non-coding RNA annotation results
Type		Copy	Average length(bp)	Total length(bp)	% of genome
miRNA		97	138.412	13426	0.007831
tRNA		492	74.8902	36846	0.021492
rRNA	rRNA	1731	2007.96	3475784	2.02742
	18S	396	1839.63	728494	0.424929
	28S	408	6471.16	2640233	1.54004
	5.8S	0	0	0	0
	5S	927	115.488	107057	0.062446
	8S	0	0	0	0
snRNA	snRNA	114	125.263	14280	0.008329
	CD-box	63	105.254	6631	0.003868
	HACA-box	3	120	360	0.00021
	splicing	48	151.854	7289	0.004252
	scaRNA	0	0	0	0

## Sheet: Table. S6-7
Table. S6-7 BUSCO assessment
	Assembly No.	Assembly ratio(%)	Annotation No.	Annotation ratio(%)
Complete BUSCOs	1582	98	1516	93.9
Complete and single-copy BUSCOs	1277	79.1	829	51.4
Complete and duplicated BUSCOs	305	18.9	687	42.6
Fragmented BUSCOs	7	0.4	29	1.8
Missing BUSCOs	25	1.5	69	4.3
Total BUSCO groups searched	1614	100	1614	100
