# Supplementary material for: Microbiota-mediated nitrogen fixation and homeostasis in aerial root-mucilage
Source: Research Square preprint supplement (doi:10.21203/rs.3.rs-1761850/v1), 2022-06-24
Supplement: Supplementary file 2 [file 7e57f72567d3fe80f8436905.xlsx]

## Sheet: Table. S1-1
Table. S1-1 Relative content of different compounds of aerial root mucilage (ARM) and underground root exudate (URE)
Index	Formula	Compounds	Class I	Class II	CAS	Level	URE-1	URE-2	URE-3	ARM-1	ARM-2	ARM-3	VIP	Fold_Change	Log2FC	Type
pmp001198	C6H13NO2	6-Deoxyfagomine	Alkaloids	Piperidine alkaloids	197449-09-5	3	62168	48203	59913	3003200	3218300	2910800	1.29265	53.6298	5.74496	up
pme2433	C4H11NO2	Diethanolamine	Alkaloids	Alkaloids	111-42-2	3	61770	53439	66694	711890	804500	782440	1.29178	12.6377	3.65966	up
pme2122	C5H9N3	Histamine	Alkaloids	Alkaloids	51-45-6	3	23824	33733	24920	228270	247920	260720	1.28578	8.93473	3.15942	up
pme1841	C5H14N2	Cadaverine	Alkaloids	Alkaloids	462-94-2	3	4286.4	4916.7	5130.1	206620	206520	201090	1.29307	42.8537	5.42135	up
pme1691	C7H16NO2	Acetylcholine	Alkaloids	Alkaloids	60-31-1	3	58351	54165	70193	617030	539890	533070	1.28998	9.24963	3.2094	up
pmb1754	C5H15NO4P+	O-Phosphocholine	Alkaloids	Alkaloids	107-73-3	3	64775	28352	48488	1058500	1253300	1141500	1.27971	24.3851	4.60793	up
pmb0484	C5H13NO	Choline	Alkaloids	Alkaloids	62-49-7	3	336670	375160	344810	25819000	25573000	24913000	1.2933	72.2148	6.17422	up
mws2218	C8H10N4O2	Caffeine	Alkaloids	Alkaloids	21399	1	51002	51551	46586	315010	342670	309760	1.29168	6.48683	2.69751	up
mws1346	C6H11NO4	DL-2-Aminoadipic acid	Alkaloids	Alkaloids	542-32-5	3	79440	96942	105170	868900	944760	959550	1.28989	9.84973	3.30008	up
mws0983	C20H39NO2	N-Oleoylethanolamine	Alkaloids	Alkaloids	111-58-0	3	79205	79252	80601	427520	439260	415160	1.29328	5.36246	2.4229	up
mws0191	C5H11NO2	Betaine	Alkaloids	Alkaloids	107-43-7	2	4070000	3272500	3578700	7333600	7738800	7543900	1.27414	2.07086	1.05023	up
Lmrn003201	C11H11NO3	Indole-3-lactic acid	Alkaloids	Plumerane	1821-52-9	2	26156	26259	26236	91338	103450	88548	1.28971	3.60245	1.84898	up
HJKP000649	C8H9NO	N-benzylformamide	Alkaloids	Alkaloids	6343-54-0	2	31093	36516	36844	962860	919500	970300	1.29285	27.3105	4.77138	up
pmb1096	C8H7N	Indole	Alkaloids	Plumerane	120-72-9	3	59870	65719	45069	39522	55679	42802	0.739404	0.808652	-0.306408	insig
mws0146	C7H7NO2	Nicotinic Acid Methyl Ester(Methyl Nicotinate)	Alkaloids	Pyridine alkaloids	93-60-7	3	38224	47799	35664	24402	20312	20755	1.22575	0.538011	-0.894291	insig
mws0018	C10H26N4	Spermine	Alkaloids	Alkaloids	71-44-3	3	21547000	20225000	22332000	16798000	17489000	15386000	1.21136	0.774881	-0.367953	insig
pmb0782	C5H11N	Piperidine	Alkaloids	Alkaloids	110-89-4	B	2850900	9	9	9	2985500	3124800	0.434367	2.14328	1.09982	insig
pme2292	C4H12N2	Putrescine	Alkaloids	Phenolamine	110-60-1	B	182270	9	9	9	163960	177460	0.427396	1.87302	0.905366	insig
pmp001287	C8H9N	N-Benzylmethylene isomethylamine	Alkaloids	Alkaloids	-	B	4064900	9	9	9	4211700	4309700	0.433317	2.09633	1.06787	insig
pme2693	C6H14N2O	N-Acetylputrescine	Alkaloids	Phenolamine	18233-70-0	B	45814	9	9	9	53310	53456	0.441392	2.3297	1.22015	insig
pmb0501	C5H14N4	Agmatine	Alkaloids	Phenolamine	306-60-5	B	57970	9	9	9	58938	61122	0.433525	2.07058	1.05004	insig
pmb0374	C5H5N5	2-Aminopurine	Alkaloids	Alkaloids	452-06-2	B	200950	9	9	9	186170	163910	0.423065	1.74201	0.800756	insig
pme1137	C6H5NO3	6-Hydroxynicotinic acid	Alkaloids	Alkaloids	5006-66-6	B	984930	9	9	9	981620	957540	0.430456	1.9688	0.977319	insig
mws0704	C2H8NO4P	O-Phosphorylethanolamine	Alkaloids	Alkaloids	1071-23-4	B	187720	9	9	9	189600	195830	0.432759	2.05307	1.03778	insig
mws0017	C7H19N3	Spermidine	Alkaloids	Phenolamine	124-20-9	B	66211	9	9	9	51403	46930	0.411378	1.48488	0.570345	insig
pmb0818	C11H11NO3	Methoxyindoleacetic acid	Alkaloids	Plumerane	3471-31-6	B	190560	9	9	9	228520	209870	0.439152	2.30037	1.20186	insig
pmb0490	C13H18N2O2	p-Coumaroylputrescine	Alkaloids	Phenolamine	34136-53-3	B	65940	9	9	9	73414	49201	0.424942	1.85912	0.894622	insig
mws1383	C12H10N4O2	Lumichrome	Alkaloids	Alkaloids	1086-80-2	B	35253	9	9	9	27584	26271	0.411968	1.52715	0.610839	insig
pmb0323	C13H18N2O3	N-Caffeoylputrescine	Alkaloids	Phenolamine	29554-26-5	B	24256	9	9	9	21957	23629	0.426656	1.87835	0.909464	insig
Lmlp003161	C14H20N2O3	N-Feruloylputrescine	Alkaloids	Phenolamine	501-13-3	B	174750	9	9	9	177240	164880	0.42994	1.95762	0.969099	insig
pmb2211	C19H38N2O3	Cocamidopropyl betaine	Alkaloids	Alkaloids	873943	A	1044700	9	9	9	1042300	1073600	0.431866	2.02534	1.01816	insig
pmb1912	C20H23N7O7	10-Formyltetrahydrofuran	Alkaloids	Alkaloids	2800-34-2	B	154290	9	9	9	166420	154160	0.43342	2.07759	1.05491	insig
Lmqn000780	C17H27N3O17P2	Uridine 5'-diphospho-N-acetylglucosamine	Alkaloids	Alkaloids	528-04-1	B	312860	9	9	9	308050	335360	0.432741	2.05645	1.04016	insig
pme1651	C10H9NO2	Indole 3-acetic acid (IAA)	Alkaloids	Plumerane	87-51-4	3	2921400	3101000	3077400	71905	82887	104380	1.291	0.0284811	-5.13385	down
pmb0130	C12H14N2O	Acetryptine	Alkaloids	Plumerane	3551-18-6	3	140970	173220	154410	22437	26339	24970	1.28967	0.157375	-2.66772	down
pma2987	C6H11N3O	Histidinol	Alkaloids	Alkaloids	501-28-0	3	37448000	38868000	38290000	4028200	5613400	4833100	1.28829	0.1263	-2.98508	down
pma0948	C8H11NO	Phenylethanolamine	Alkaloids	Alkaloids	7568-93-6	3	240410	240470	234000	23496	20582	20024	1.29255	0.0896682	-3.47926	down
mws1320	C10H11NO	Tryptophol	Alkaloids	Plumerane	526-55-6	1	26511	37615	31372	2798.8	2641.4	3686.5	1.28403	0.0955695	-3.38731	down
mws0005	C10H12N2	Tryptamine	Alkaloids	Plumerane	61-54-1	3	966030	986700	919170	52397	49137	47637	1.29337	0.0519416	-4.26697	down
MA10074217	C9H7NO	4-Hydroxyquinoline	Alkaloids	Quinoline alkaloids	611-36-9	2	369860	359200	389640	23169	26155	25433	1.29279	0.0668249	-3.90347	down
pma6298	C5H5NO	3-Hydroxypyridine	Alkaloids	Pyridine alkaloids	109-00-2	3	56565	62367	64514	9	9	9	1.29352	0.000147182	-12.7301	down
MWSmce460	C5H9NO	2-Piperidone	Alkaloids	Piperidine alkaloids	675-20-7	1	370020	376090	368890	9	9	9	1.2936	2.42152e-05	-15.3337	down
MWS2076	C6H7NO	2-Aminophenol*	Alkaloids	Phenolamine	95-55-6	2	18852	23722	24639	9	9	9	1.29327	0.000401708	-11.2816	down
Zmzp000616	C6H7NO	4-Aminophenol*	Alkaloids	Phenolamine	123-30-8	2	23395	24434	23257	9	9	9	1.29361	0.000379822	-11.3624	down
pme0066	C3H7N3O2	Guanidinoacetate	Alkaloids	Alkaloids	352-97-6	3	5347.1	8095.1	7141.2	9	9	9	1.29281	0.00131174	-9.57431	down
pmb0785	C9H7N	Isoquinoline	Alkaloids	Isoquinoline alkaloids	119-65-3	1	387570	424310	443500	9	9	9	1.29353	2.15074e-05	-15.5048	down
pme2831	C4H11N5	1,1-Dimethylbiguanide	Alkaloids	Alkaloids	657-24-9	3	21803	35291	19020	9	9	9	1.29255	0.000354731	-11.461	down
pmc0682	C8H8N2	4-Aminoindole	Alkaloids	Plumerane	5192-23-4	3	78649	50222	89716	9	9	9	1.29225	0.000123521	-12.983	down
MWSmce314	C8H7NO	Oxindole	Alkaloids	Plumerane	59-48-3	1	184980	241880	240360	9	9	9	1.2934	4.04664e-05	-14.5929	down
pme0489	C7H8N2O	N-Methylnicotinamide	Alkaloids	Pyridine alkaloids	114-33-0	3	12093	8538.5	9406.4	9	9	9	1.29294	0.000898864	-10.1196	down
pme2268	C7H7NO2	Trigonelline	Alkaloids	Pyridine alkaloids	535-83-1	3	878270	623470	750370	9	9	9	1.2933	1.19888e-05	-16.348	down
Lmqp002784	C7H7NO2	Salicylamide	Alkaloids	Phenolamine	65-45-2	2	119070	117530	107100	9	9	9	1.29361	7.85569e-05	-13.6359	down
mws0103	C9H7NO	Indole-3-carboxaldehyde	Alkaloids	Plumerane	487-89-8	1	176790	156750	158720	9	9	9	1.29354	5.48491e-05	-14.1542	down
Lmgp000796	C8H7NO2	4-Hydroxymandelonitrile	Alkaloids	Phenolamine	13093-65-7	3	12932	20956	17878	9	9	9	1.2928	0.000521578	-10.9048	down
mws0102	C9H7NO2	Indole-5-carboxylic acid*	Alkaloids	Plumerane	1670-81-1	1	302640	408170	303340	9	9	9	1.29351	2.66233e-05	-15.197	down
mws1417	C9H7NO2	Indole-3-carboxylic acid*	Alkaloids	Plumerane	771-50-6	1	664800	837010	845660	9	9	9	1.29347	1.15017e-05	-16.4078	down
MWSmce315	C7H5NS2	2-Mercaptobenzothiazole	Alkaloids	Alkaloids	149-30-4	2	66659	61339	65170	9	9	9	1.29353	0.000139775	-12.8046	down
MWS5169	C10H7NO2	Quinoline-4-carboxylic acid	Alkaloids	Quinoline alkaloids	486-74-8	3	4146.9	4260.4	3784.8	9	9	9	1.2936	0.00221455	-8.81877	down
pme2024	C10H12N2O	Serotonin	Alkaloids	Plumerane	50-67-9	3	15536	14936	11903	9	9	9	1.29342	0.000637168	-10.616	down
MWStz070	C9H11NO3	N-(2-Hydroxy-4-methoxyphenyl)acetamide	Alkaloids	Phenolamine	58469-06-0	3	166640	206490	192420	9	9	9	1.29353	4.77411e-05	-14.3544	down
Hmmp001310	C11H9NO2	3-Indoleacrylic acid	Alkaloids	Plumerane	1204-06-4	1	83030	61198	70350	9	9	9	1.29325	0.000125828	-12.9563	down
Hmgp002327	C11H9O2N	3-amino-2-naphthoic acid	Alkaloids	Alkaloids	-	1	26391	38395	29213	9	9	9	1.29328	0.000287237	-11.7655	down
MWStz157	C13H15NO	1-Cinnamoylpyrrolidine	Alkaloids	Pyrrole alkaloids	52438-21-8	2	18320	18571	21586	9	9	9	1.29337	0.00046172	-11.0807	down
Zmzp005934	C18H37NO	Stearamide	Alkaloids	Alkaloids	124-26-5	1	725460	590320	559020	9	9	9	1.29348	1.44015e-05	-16.0834	down
Hmtp001118	C14H19NO7	Ehretioside	Alkaloids	Alkaloids	-	3	32522	29037	33643	9	9	9	1.29341	0.000283607	-11.7838	down
pme2914	C6H10O5	3-Hydroxy-3-methylpentane-1,5-dioic acid	Amino acids and derivatives	Amino acids and derivatives	503-49-1	1	22985	20604	16964	264970	292880	277200	1.28991	13.7904	3.78559	up
pme1210	C5H11NO2S	L-Methionine	Amino acids and derivatives	Amino acids and derivatives	63-68-3	1	23385	16886	17843	254840	283390	230770	1.2883	13.2326	3.72603	up
pme0021	C9H11NO2	L-Phenylalanine	Amino acids and derivatives	Amino acids and derivatives	63-91-2	1	1634400	1537200	1582900	4802100	4682700	4734500	1.29298	2.9907	1.58048	up
pme0014	C5H9NO4	L-Glutamic acid	Amino acids and derivatives	Amino acids and derivatives	56-86-0	1	170170	108710	103560	324980	340090	349180	1.23246	2.65205	1.40711	up
pme0006	C5H9NO2	L-Proline	Amino acids and derivatives	Amino acids and derivatives	147-85-3	1	811330	688900	834070	10022000	10757000	10229000	1.29239	13.2836	3.73158	up
pmb0962	C10H22N2O4	L-Lysine-Butanoic Acid	Amino acids and derivatives	Amino acids and derivatives	80407-71-2	3	254340	263930	170060	2777800	3649800	3577000	1.28296	14.5346	3.86142	up
NK10251888	C8H18N4O2	NG,NG-Dimethyl-L-arginine	Amino acids and derivatives	Amino acids and derivatives	30315-93-6	3	130290	73833	89473	195970	200390	218020	1.18398	2.0926	1.0653	up
mws1050	C5H9NO4	O-Acetylserine	Amino acids and derivatives	Amino acids and derivatives	5147-00-2	3	76094	84062	67294	341060	394480	389910	1.28649	4.94812	2.30688	up
mws0671	C4H9NO3	L-Homoserine	Amino acids and derivatives	Amino acids and derivatives	672-15-1	3	74167	29171	52405	7861700	8614300	9011100	1.28695	163.648	7.35446	up
mws0282	C11H12N2O2	L-Tryptophan	Amino acids and derivatives	Amino acids and derivatives	73-22-3	1	27827	29742	56953	7536500	7396500	7326900	1.28947	194.372	7.60268	up
mws0260	C6H14N4O2	L-Arginine	Amino acids and derivatives	Amino acids and derivatives	74-79-3	3	36884	35852	24698	210510	217610	251770	1.27966	6.97795	2.8028	up
mws0254	C6H9N3O2	L-Histidine	Amino acids and derivatives	Amino acids and derivatives	71-00-1	3	64689	81879	94720	288990	308620	302480	1.2758	3.73036	1.89931	up
mws0250	C9H11NO3	L-Tyrosine	Amino acids and derivatives	Amino acids and derivatives	60-18-4	1	327390	221250	297600	11997000	12875000	10872000	1.29092	42.2386	5.40049	up
mws0230	C4H9NO3	L-Threonine	Amino acids and derivatives	Amino acids and derivatives	72-19-5	1	76752	84359	46185	7778200	8529400	9190500	1.28888	123.003	6.94255	up
mws0219	C4H7NO4	L-Aspartic Acid	Amino acids and derivatives	Amino acids and derivatives	56-84-8	1	36432	43544	49322	2677100	2535000	2561900	1.29252	60.1247	5.90989	up
mws0216	C5H9NO3	Trans-4-Hydroxy-L-proline	Amino acids and derivatives	Amino acids and derivatives	51-35-4	3	570290	481090	589510	2604000	2840900	2892700	1.28941	5.08114	2.34515	up
ML10181668	C6H11NO2	Cycloleucine	Amino acids and derivatives	Amino acids and derivatives	52-52-8	1	1607200	1393800	1664200	4198700	4647100	4533000	1.28551	2.86779	1.51994	up
Lmhp002031	C12H24N2O3	L-Leucyl-L-Leucine	Amino acids and derivatives	Amino acids and derivatives	3303-31-9	3	20732	17694	20126	523130	491500	563750	1.29297	26.9569	4.75258	up
Zmgn002106	C11H13NO3	N-Acetyl-L-phenylalanine	Amino acids and derivatives	Amino acids and derivatives	2018-61-3	3	64298	55193	48517	71327	48305	51799	0.0520325	1.02037	0.0290981	insig
pme3388	C7H16N4O2	Homoarginine	Amino acids and derivatives	Amino acids and derivatives	156-86-5	3	23046	18882	26502	13087	11999	13626	1.20767	0.565717	-0.821848	insig
pme3382	C6H11NO4	N-Acetyl-L-threonine	Amino acids and derivatives	Amino acids and derivatives	17093-74-2	3	34496	34712	26861	33896	34225	30560	0.216268	1.02719	0.0387014	insig
pme0122	C8H16N2O3	N6-Acetyl-L-lysine	Amino acids and derivatives	Amino acids and derivatives	692-04-6	3	122060	110430	102260	70068	142400	101090	0.312826	0.936693	-0.0943517	insig
mws0258	C6H13NO2	L-Isoleucine*	Amino acids and derivatives	Amino acids and derivatives	73-32-5	1	1327400	1415600	1011400	1177700	1264400	1124100	0.256791	0.949872	-0.0741948	insig
mws0256	C5H11NO2	L-Valine	Amino acids and derivatives	Amino acids and derivatives	72-18-4	1	3531200	3520500	3978500	3755400	3775700	3881700	0.517535	1.03469	0.0491938	insig
mws0227	C6H13NO2	L-Leucine*	Amino acids and derivatives	Amino acids and derivatives	61-90-5	1	823780	682670	752670	1073900	1196500	1116100	1.23685	1.49904	0.584034	insig
pme1987	C3H7NO2	L-Alanine	Amino acids and derivatives	Amino acids and derivatives	56-41-7	A	1280.6	9	9	9	2806.2	3205.4	0.517091	4.63622	2.21295	insig
pme0010	C3H7NO3	L-Serine	Amino acids and derivatives	Amino acids and derivatives	56-45-1	A	6867300	9	9	9	6051800	6948300	0.428821	1.89304	0.920705	insig
mws0263	C5H7NO3	5-Oxo-L-Proline	Amino acids and derivatives	Amino acids and derivatives	98-79-3	A	55669	9	9	9	60605	64733	0.438937	2.25092	1.17051	insig
mws0001	C4H8N2O3	L-Asparagine	Amino acids and derivatives	Amino acids and derivatives	70-47-3	A	748560	9	9	9	639670	732720	0.426705	1.83334	0.874475	insig
pme2527	C5H12N2O2	L-Ornithine	Amino acids and derivatives	Amino acids and derivatives	70-26-8	B	105150	9	9	9	114220	114100	0.436254	2.17109	1.11842	insig
Rfmb318	C7H14NO2+	D-Proline betaine	Amino acids and derivatives	Amino acids and derivatives	1195-94-4	A	964090	9	9	9	1045800	1089000	0.436258	2.21428	1.14684	insig
pme0193	C5H10N2O3	L-Glutamine	Amino acids and derivatives	Amino acids and derivatives	56-85-9	A	277200	9	9	9	272590	275160	0.430575	1.97591	0.98252	insig
pme0026	C6H14N2O2	L-Lysine	Amino acids and derivatives	Amino acids and derivatives	56-87-1	A	323460	9	9	9	311030	321970	0.43005	1.95688	0.968558	insig
Zmzn000113	C5H9NO4	L-threo-3-Methylaspartate	Amino acids and derivatives	Amino acids and derivatives	6061-13-8	A	1034600	9	9	9	1011900	979800	0.429343	1.92507	0.944909	insig
Lmbn001365	C6H13NO3	N-Hydroxy-L-isoleucine	Amino acids and derivatives	Amino acids and derivatives	-	B	12289	9	9	9	12313	13879	0.436155	2.12895	1.09014	insig
pme0128	C6H12N2O3	L-Alanyl-L-Alanine	Amino acids and derivatives	Amino acids and derivatives	1948-31-8	B	14557	9	9	9	8135.8	8552.7	0.385104	1.14563	0.196136	insig
pme2758	C5H9NO5	4-Hydroxy-L-glutamic acid	Amino acids and derivatives	Amino acids and derivatives	3913-68-6	B	25271	9	9	9	22984	23524	0.425172	1.83942	0.879248	insig
Lmbp000123	C6H13NO2S	L-Homomethionine	Amino acids and derivatives	Amino acids and derivatives	25148-30-5	B	193180	9	9	9	192810	202320	0.43253	2.04525	1.03228	insig
pme0181	C7H11N3O2	3-Methyl-L-Histidine	Amino acids and derivatives	Amino acids and derivatives	368-16-1	B	30584	9	9	9	24239	20780	0.408579	1.47141	0.557196	insig
pme0124	C7H12N2O3	L-Glycyl-L-proline	Amino acids and derivatives	Amino acids and derivatives	704-15-4	B	6862.9	9	9	9	3843.6	8085.4	0.41215	1.73495	0.794892	insig
Zmyn000155	C7H14N2O3	N-α-Acetyl-L-ornithine	Amino acids and derivatives	Amino acids and derivatives	1572591	B	12003	9	9	9	8487.3	14052	0.42344	1.87574	0.907462	insig
pme2559	C6H9NO5	N-Acetyl-L-Aspartic Acid	Amino acids and derivatives	Amino acids and derivatives	997-55-7	B	26410	9	9	9	22346	20569	0.415865	1.62419	0.699717	insig
pme0008	C6H13N3O3	L-Citrulline	Amino acids and derivatives	Amino acids and derivatives	372-75-8	A	1249900	9	9	9	1239800	1209700	0.430248	1.95974	0.970659	insig
pme2602	C3H8NO6P	O-Phospho-L-serine	Amino acids and derivatives	Amino acids and derivatives	407-41-0	B	10611	9	9	9	17006	17574	0.468732	3.25421	1.70231	insig
pme0137	C7H12N2O4	N-Acetyl-L-Glutamine	Amino acids and derivatives	Amino acids and derivatives	2490-97-3	B	137870	9	9	9	149010	151240	0.43629	2.17756	1.12271	insig
mws0736	C8H16N2O3	N-Glycyl-L-leucine	Amino acids and derivatives	Amino acids and derivatives	869-19-2	A	339790	9	9	9	443880	370530	0.440697	2.3967	1.26105	insig
pme0075	C7H11NO5	N-Acetyl-L-glutamic acid	Amino acids and derivatives	Amino acids and derivatives	1188-37-0	A	381330	9	9	9	606530	493880	0.450125	2.8856	1.52887	insig
mws0193	C7H15N3O3	L-Homocitrulline	Amino acids and derivatives	Amino acids and derivatives	1190-49-4	B	36281	9	9	9	44251	36924	0.438559	2.23654	1.16127	insig
pme3827	C9H11NO4	3,4-Dihydroxy-L-phenylalanine	Amino acids and derivatives	Amino acids and derivatives	59-92-7	B	64822	9	9	9	112900	89789	0.458486	3.12613	1.64438	insig
mws5042	C11H14N2O3	L-Glycyl-L-phenylalanine	Amino acids and derivatives	Amino acids and derivatives	721-66-4	A	292750	9	9	9	303190	290110	0.431951	2.02655	1.01903	insig
mws0520	C11H13NO4	N-Acetyl-L-tyrosine	Amino acids and derivatives	Amino acids and derivatives	537-55-3	B	15007	9	9	9	15292	17781	0.43849	2.2018	1.13868	insig
Lmhp001461	C11H20N2O3	L-Prolyl-L-Leucine	Amino acids and derivatives	Amino acids and derivatives	52899-07-7	B	192820	9	9	9	191730	191020	0.43081	1.98487	0.989047	insig
Lmhp001670	C11H22N2O3	L-Valyl-L-Leucine	Amino acids and derivatives	Amino acids and derivatives	3989-97-7	A	669260	9	9	9	789960	744240	0.438129	2.29233	1.19682	insig
mws4176	C12H16N2O3	L-Alanyl-L-Phenylalanine	Amino acids and derivatives	Amino acids and derivatives	3061-90-3	A	125580	9	9	9	158600	145950	0.442584	2.42487	1.27791	insig
mws0221	C6H12N2O4S2	L-Cystine	Amino acids and derivatives	Amino acids and derivatives	56-89-3	B	27553	9	9	9	38812	41568	0.457226	2.91571	1.54385	insig
Lmrj002087	C10H18N2O5	L-Isoleucyl-L-Aspartate	Amino acids and derivatives	Amino acids and derivatives	-	B	147400	9	9	9	157860	185920	0.44006	2.33207	1.22161	insig
Lmhp001732	C14H18N2O3	L-Prolyl-L-Phenylalanine	Amino acids and derivatives	Amino acids and derivatives	13589-02-1	B	86264	9	9	9	89870	94774	0.435465	2.14011	1.09769	insig
mws0715	C13H16N2O4	Phenylacetyl-L-glutamine	Amino acids and derivatives	Amino acids and derivatives	28047-15-6	B	22555	9	9	9	27368	22309	0.437766	2.20113	1.13824	insig
Lmhp002001	C14H20N2O3	L-Valyl-L-Phenylalanine	Amino acids and derivatives	Amino acids and derivatives	3918-92-1	A	256610	9	9	9	260350	274260	0.433518	2.08325	1.05883	insig
pme2890	C8H16N2O4S2	L-Homocystine	Amino acids and derivatives	Amino acids and derivatives	626-72-2	B	39380	9	9	9	42050	32201	0.426408	1.88487	0.914463	insig
pme1712	C11H20N2O6	L-Saccharopine	Amino acids and derivatives	Amino acids and derivatives	997-68-2	B	343500	9	9	9	353360	353930	0.432828	2.05899	1.04193	insig
mws5035	C15H22N2O3	L-Leucyl-L-phenylalanine	Amino acids and derivatives	Amino acids and derivatives	56217-82-4	A	624800	9	9	9	573430	594030	0.42772	1.86849	0.901876	insig
mws0629	C13H16N2O5	L-Aspartyl-L-Phenylalanine	Amino acids and derivatives	Amino acids and derivatives	13433-09-5	B	80859	9	9	9	70277	71274	0.422733	1.75031	0.807612	insig
mws1375	C12H21N3O6	Nicotianamine	Amino acids and derivatives	Amino acids and derivatives	34441-14-0	B	24091	9	9	9	29796	29833	0.446427	2.47368	1.30666	insig
pmb2855	C11H20N2O8	L-Glutamine-O-glycoside	Amino acids and derivatives	Amino acids and derivatives	-	B	23542	9	9	9	26372	17520	0.424208	1.86337	0.897914	insig
pmb2857	C11H19NO9	L-Glutamic acid-O-glycoside	Amino acids and derivatives	Amino acids and derivatives	-	B	33595	9	9	9	40057	36382	0.440024	2.27436	1.18546	insig
mws0636	C18H20N2O3	L-Phenylalanyl-L-phenylalanine	Amino acids and derivatives	Amino acids and derivatives	2577-40-4	A	32636	9	9	9	41757	41910	0.448228	2.5625	1.35755	insig
mws0582	C11H19N3O6S	S-(Methyl)glutathione	Amino acids and derivatives	Amino acids and derivatives	2922-56-7	A	3241300	9	9	9	3382300	3177100	0.431738	2.02369	1.01699	insig
pme1286	C14H20N6O5S	S-(5'-Adenosy)-L-homocysteine	Amino acids and derivatives	Amino acids and derivatives	979-92-0	A	21320	9	9	9	21144	25871	0.438045	2.20377	1.13997	insig
pme2735	C15H22N6O5S	S-Adenosyl-L-methionine	Amino acids and derivatives	Amino acids and derivatives	29908-03-0	A	28018	9	9	9	18677	24884	0.411997	1.55407	0.636055	insig
pmb0464	C16H27NO14	L-Aspartic acid-O-diglucoside	Amino acids and derivatives	Amino acids and derivatives	-	B	219320	9	9	9	236460	280520	0.440291	2.35704	1.23698	insig
mws4134	C20H32N6O12S2	Oxiglutatione	Amino acids and derivatives	Amino acids and derivatives	27025-41-8	A	31330	9	9	9	25591	22806	0.412375	1.54415	0.626812	insig
Zmjp000182	C7H16N4O2	N-Monomethyl-L-arginine	Amino acids and derivatives	Amino acids and derivatives	17035-90-4	2	151970	146330	197300	50903	49971	63509	1.26127	0.331685	-1.59212	down
pme3033	C4H9NO2	N,N-Dimethylglycine	Amino acids and derivatives	Amino acids and derivatives	1118-68-9	3	3085300	2706000	2827100	1214000	1223100	1285100	1.28654	0.43189	-1.21126	down
pme2617	C5H11NO3S	L-Methionine Sulfoxide	Amino acids and derivatives	Amino acids and derivatives	3226-65-1	1	3218900	3372300	3005000	411380	474810	422030	1.29206	0.136327	-2.87486	down
pme1002	C8H11NO	L-Tyramine	Amino acids and derivatives	Amino acids and derivatives	51-67-2	3	537170	553090	541110	38881	43610	30875	1.29022	0.0694913	-3.84702	down
pme0253	C8H15NO3	N-Acetyl-L-leucine	Amino acids and derivatives	Amino acids and derivatives	1188-21-2	2	114160	80294	96889	44453	36642	34956	1.24656	0.398331	-1.32796	down
MWSmce461	C4H7NO2	L-Azetidine-2-carboxylic acid	Amino acids and derivatives	Amino acids and derivatives	2133-34-8	3	140710	121730	97289	9	9	9	1.29338	7.50565e-05	-13.7017	down
pme3193	C4H7NO3	N-Acetyl-L-glycine	Amino acids and derivatives	Amino acids and derivatives	543-24-8	3	25528	23178	16456	9	9	9	1.29305	0.000414352	-11.2369	down
MWS5209	C5H11NO2	N-Methyl-α-aminoisobutyric acid	Amino acids and derivatives	Amino acids and derivatives	2566-34-9	3	191020	189280	93866	9	9	9	1.29245	5.69421e-05	-14.1001	down
pme0195	C3H7NO2S	L-Cysteine	Amino acids and derivatives	Amino acids and derivatives	52-90-4	3	114480	202720	133850	9	9	9	1.29302	5.98603e-05	-14.028	down
MWS2413	C5H9NO3	N-acetyl-beta-alanine	Amino acids and derivatives	Amino acids and derivatives	3025-95-4	3	19071	20422	21717	9	9	9	1.29349	0.000441104	-11.1466	down
mws1587	C6H13NO2	L-Norleucine*	Amino acids and derivatives	Amino acids and derivatives	327-57-1	1	1369200	1322800	1522200	9	9	9	1.29349	6.40691e-06	-17.2519	down
Zmdp000972	C4H9NO2S	S-Methyl-L-cysteine	Amino acids and derivatives	Amino acids and derivatives	1187-84-4	2	21410	23826	19619	9	9	9	1.29359	0.000416313	-11.23	down
pme0057	C4H9NO2S	L-Homocysteine	Amino acids and derivatives	Amino acids and derivatives	6027-13-0	3	44505	21525	54879	9	9	9	1.29	0.000223308	-12.1287	down
MWSmce585	C4H9NO2	Methyl 3-aminopropanoate	Amino acids and derivatives	Amino acids and derivatives	3196-73-4	3	47254	56629	51356	9	9	9	1.29356	0.000173925	-12.4892	down
Hmsp000364	C7H13NO2	L-Cyclopentylglycine	Amino acids and derivatives	Amino acids and derivatives	2521-84-8	3	513700	436190	498500	9	9	9	1.29347	1.86414e-05	-15.7111	down
pme3351	C6H11NO3	Allysine(6-Oxo DL-Norleucine)	Amino acids and derivatives	Amino acids and derivatives	1962-83-0	3	28641	27194	49211	9	9	9	1.29184	0.00025703	-11.9258	down
Lmqp000427	C6H11NO3	N-Methyl-Trans-4-Hydroxy-L-Proline	Amino acids and derivatives	Amino acids and derivatives	4252-82-8	3	177070	137570	167620	9	9	9	1.29332	5.59864e-05	-14.1246	down
MWSmce608	C6H13NO3	4-Hydoxy-L-Isoleucine	Amino acids and derivatives	Amino acids and derivatives	781658-23-9	3	40491	27520	51924	9	9	9	1.29192	0.000225122	-12.117	down
mws0224	C5H11NO2S	DL-Methionine	Amino acids and derivatives	Amino acids and derivatives	59-51-8	3	27471	14992	24693	9	9	9	1.29175	0.000402049	-11.2803	down
Zmdp000292	C7H16N4O2	Arginine methyl ester	Amino acids and derivatives	Amino acids and derivatives	-	2	144300	128310	190610	9	9	9	1.293	5.82876e-05	-14.0665	down
Zmzp000145	C9H20N2O2	Trimethyllysine	Amino acids and derivatives	Amino acids and derivatives	23284-33-5	3	316740	250110	224810	9	9	9	1.29338	3.41056e-05	-14.8396	down
MWS5164	C8H18N4O2	N,N'-Dimethylarginine;SDMA	Amino acids and derivatives	Amino acids and derivatives	30344-00-4	3	113140	118090	119410	9	9	9	1.29358	7.70021e-05	-13.6647	down
MWSslk120	C11H13NO3	N-Acetyl-DL-phenylalanine	Amino acids and derivatives	Amino acids and derivatives	2901-75-9	3	58780	53340	61788	9	9	9	1.29344	0.000155255	-12.6531	down
pme0170	C8H16N4O3	N-Acetyl-L-Arginine	Amino acids and derivatives	Amino acids and derivatives	155-84-0	3	46144	45300	32690	9	9	9	1.29333	0.000217507	-12.1667	down
pmp001127	C16H12O6	Chrysoeriol*	Flavonoids	Flavones	491-71-4	3	4465.9	4994.7	3684.1	11193	8208.6	11776	1.22614	2.37188	1.24603	up
pmp000001	C16H12O6	Hispidulin (5,7,4'-Trihydroxy-6-methoxyflavone)*	Flavonoids	Flavones	1447-88-7	3	4204.8	3361.4	2042.6	44676	44631	42021	1.27609	13.6675	3.77267	up
pme0376	C15H12O5	Naringenin (5,7,4'-Trihydroxyflavanone)*	Flavonoids	Flavanones	480-41-1	3	41041	40528	41670	232190	222310	227920	1.29352	5.53737	2.4692	up
mws0914	C15H12O5	Pinobanksin*	Flavonoids	Flavanonols	548-82-3	3	43064	37006	40350	236080	214620	226050	1.29163	5.61991	2.49055	up
mws0058	C16H12O6	Diosmetin (5,7,3'-Trihydroxy-4'-methoxyflavone)	Flavonoids	Flavanones	520-34-3	3	9338.2	10747	10300	45456	47356	44471	1.29097	4.51809	2.17571	up
mws0046	C27H32O14	Naringenin-7-O-Neohesperidoside(Naringin)	Flavonoids	Flavanones	10236-47-2	2	24989	27625	25056	1311500	1160800	1077300	1.29263	45.701	5.51416	up
Lmyp004318	C30H26O13	Kaempferol-3-O-(6''-p-Coumaroyl)galactoside	Flavonoids	Flavonols	-	3	3286.5	5213.1	3403.2	26359	34031	36052	1.27469	8.10246	3.01836	up
pmp000113	C20H20O8	5-Hydroxy-6,7,8,3',4'-pentamethoxyflavone	Flavonoids	Flavones	2174-59-6	3	2913.2	2987.6	1992.2	4546.7	4868.7	4917.4	1.18282	1.81589	0.860675	insig
pme2960	C15H12O5	Naringenin chalcone	Flavonoids	Chalcones	73692-50-9	3	19107	18507	17068	7483.8	11191	10294	1.20539	0.529768	-0.916566	insig
mws1731	C15H12O	Chalcone	Flavonoids	Chalcones	94-41-7	B	7663.8	9	9	9	4429	8575.9	0.411734	1.69412	0.760537	insig
mws0789	C15H12O4	Pinocembrin (Dihydrochrysin)	Flavonoids	Dihydroflavone	480-39-7	B	30278	9	9	9	46531	36818	0.452549	2.75145	1.46019	insig
Lmmp007480	C15H12O4	2,4,4'-trihydroxychalcone	Flavonoids	Flavonoid	-	B	21458	9	9	9	18167	23529	0.428491	1.94194	0.957495	insig
mws0041	C15H10O5	Baicalein	Flavonoids	Flavonoid	491-67-8	B	49568	9	9	9	48795	48452	0.429956	1.96136	0.971854	insig
Lmgp003779	C15H11O5+	Luteolinidin	Flavonoids	Flavonoid	-	B	13218	9	9	9	13423	12890	0.430844	1.98867	0.991802	insig
pme3475	C15H12O5	Butin*	Flavonoids	Dihydroflavone	492-14-8	B	12336	9	9	9	10885	10111	0.418072	1.70026	0.765755	insig
pme1201	C15H14O5	Phloretin	Flavonoids	Chalcones	60-82-2	B	21640	9	9	9	26103	23420	0.440898	2.28701	1.19346	insig
Lmgp004784	C15H14O5	Apiferol	Flavonoids	Flavonoid	55167-29-8	B	16952	9	9	9	18321	24029	0.447123	2.49611	1.31968	insig
mws1422	C15H14O5	Epiafzelechin	Flavonoids	Flavanols	24808-04-6	B	5007	9	9	9	2859.7	6463.7	0.416247	1.85719	0.893125	insig
mws0918	C16H12O5	Prunetin (5,4'-Dihydroxy-7-methoxyisoflavone)	Flavonoids	Isoflavones	552-59-0	B	9326.6	9	9	9	6427	6101.8	0.396615	1.34172	0.424079	insig
mws1068	C15H10O6	Kaempferol (3,5,7,4'-Tetrahydroxyflavone)	Flavonoids	Flavonols	520-18-3	A	15921	9	9	9	17220	15935	0.434246	2.08068	1.05706	insig
pme0088	C15H10O6	Luteolin (5,7,3',4'-Tetrahydroxyflavone)	Flavonoids	Flavonoid	491-70-3	B	8604.9	9	9	9	7636.5	9292.8	0.429475	1.96434	0.974044	insig
mws1094	C15H12O6	Dihydrokaempferol	Flavonoids	Dihydroflavonol	480-20-6	A	51219	9	9	9	45922	57084	0.431239	2.01056	1.0076	insig
mws1000	C15H12O6	Fustin	Flavonoids	Dihydroflavonol	20725-03-5	B	47541	9	9	9	56254	55917	0.442151	2.35875	1.23803	insig
Zmpn002440	C15H12O6	3,4,2',4',6'-Pentahydroxychalcone	Flavonoids	Chalcones	14917-41-0	A	166810	9	9	9	164280	167190	0.430869	1.98695	0.990556	insig
mws0064	C15H12O6	Eriodictyol (5,7,3',4'-Tetrahydroxyflavanone)	Flavonoids	Dihydroflavone	552-58-9	A	123940	9	9	9	121390	125330	0.430962	1.99042	0.993076	insig
mws0054	C15H14O6	Catechin	Flavonoids	Flavanols	154-23-4	A	614940	9	9	9	690580	680380	0.436802	2.22937	1.15664	insig
pme0460	C15H14O6	Epicatechin	Flavonoids	Flavanols	490-46-0	A	6073400	9	9	9	6598900	6071500	0.432992	2.08621	1.06088	insig
pmp001204	C17H14O5	Apigenin-7,4'-dimethyl ether	Flavonoids	Flavonoid	5128-44-9	B	4010.3	9	9	9	2803.8	3271.7	0.403764	1.51044	0.594968	insig
Lmjp004941	C16H12O6	Rhamnocitrin (7-Methylkaempferol)*	Flavonoids	Flavonoid	569-92-6	A	47178	9	9	9	43434	40229	0.422997	1.77286	0.82608	insig
Zmhp003514	C16H12O6	6,7,8-Tetrahydroxy-5-methoxyflavone*	Flavonoids	Flavonoid	-	B	7879.8	9	9	9	8548	8512.4	0.437908	2.16129	1.11189	insig
pmc1990	C17H16O5	4'-Hydroxy-5,7-dimethoxyflavanone	Flavonoids	Flavanols	-	B	2531200	9	9	9	3201200	2636600	0.437445	2.30632	1.2056	insig
pme2954	C15H10O7	Quercetin	Flavonoids	Flavonols	117-39-5	B	16092	9	9	9	12421	10903	0.405379	1.44836	0.534415	insig
Zmpp002571	C15H10O7	Robinetin	Flavonoids	Flavonoid	490-31-3	A	273580	9	9	9	302190	313730	0.437773	2.25122	1.17071	insig
mws0920	C15H10O7	Tricetin (5,7,3',4',5'-Pentahydroxyflavone)	Flavonoids	Flavonoid	520-31-0	B	110910	9	9	9	108530	98858	0.427015	1.86965	0.902771	insig
Cmsp004086	C16H14O6	Dihydrokaempferide	Flavonoids	Flavonols	137225-59-3	B	350260	9	9	9	358200	274410	0.425054	1.80605	0.852837	insig
mws0044	C15H12O7	Dihydroquercetin(Taxifolin)	Flavonoids	Dihydroflavonol	480-18-2	A	462990	9	9	9	464620	502610	0.433521	2.08903	1.06284	insig
Hmqn003268	C15H12O7	5,7,3',4',5'-Pentahydroxydihydroflavone	Flavonoids	Dihydroflavone	-	B	173800	9	9	9	161100	167830	0.428011	1.89243	0.920243	insig
mws0042	C15H14O7	Epigallocatechin	Flavonoids	Flavanols	970-74-1	A	767070	9	9	9	762320	735240	0.430004	1.95228	0.965158	insig
mws0049	C15H14O7	Gallocatechin	Flavonoids	Flavanols	970-73-0	A	1230300	9	9	9	1310900	1248100	0.433119	2.07996	1.05655	insig
pmp000106	C18H16O5	5,7,4'-Trimethoxyflavone	Flavonoids	Flavonoid	5631-70-9	B	2841.5	9	9	9	2437.8	2727.3	0.421426	1.80944	0.855545	insig
Lmmn004912	C16H12O7	Quercetin-3-O-methyl ether	Flavonoids	Flavonols	1486-70-0	B	10839	9	9	9	6198.9	3904.2	0.360455	0.93139	-0.102543	insig
mws2627	C16H12O7	Tamarixetin (3,3',5,7-Tetrahydroxy-4'-Methoxyflavone)	Flavonoids	Flavonoid	603-61-2	B	7402.9	9	9	9	4037.7	5335	0.38884	1.26423	0.338255	insig
mws0988	C16H12O7	Rhamnetin (7-O-Methxyl Quercetin)	Flavonoids	Flavonols	90-19-7	B	4114.3	9	9	9	3040	3480.9	0.4085	1.58021	0.660116	insig
mws0066	C16H12O7	Isorhamnetin	Flavonoids	Flavonols	480-19-3	B	12155	9	9	9	10288	10805	0.419726	1.73351	0.793695	insig
pmp000003	C16H12O7	Nepetin (5,7,3',4'-Tetrahydroxy-6-methoxyflavone)	Flavonoids	Flavonoid	520-11-6	B	21040	9	9	9	19225	17482	0.420842	1.74357	0.80204	insig
mws0032	C15H10O8	Myricetin	Flavonoids	Flavonols	529-44-2	B	32609	9	9	9	32159	32484	0.430625	1.98155	0.986629	insig
Cmsp006026	C16H14O7	Dihydrorhamnetin	Flavonoids	Flavonols	-	B	4158.7	9	9	9	3381.7	2701.4	0.399817	1.45859	0.544576	insig
Lmjp007790	C18H16O6	5-Hydroxy-3,7,4'-trimethoxyflavone	Flavonoids	Flavonoid	-	B	40144	9	9	9	40969	38267	0.430276	1.97313	0.980489	insig
Lmzp004885	C17H14O7	Tricin (5,7,4'-Trihydroxy-3',5'-dimethoxyflavone)	Flavonoids	Flavonoid	520-32-1	B	19611	9	9	9	20369	24324	0.440608	2.27734	1.18735	insig
pmp000004	C17H14O7	4',5,7-Trihydroxy-3',6-dimethoxyflavone (Jaceosidin)	Flavonoids	Flavonoid	18085-97-7	B	24557	9	9	9	25282	22576	0.429189	1.94779	0.96184	insig
mws1002	C17H14O8	Syringetin	Flavonoids	Flavonoid	4423-37-4	A	8789.5	9	9	9	8099.8	8387.3	0.425846	1.87296	0.905321	insig
pmb0681	C20H18O9	Apigenin-8-C-Arabinoside	Flavonoids	Flavonoid	-	B	6863.4	9	9	9	7862.3	2905.3	0.396435	1.56605	0.647128	insig
Hmgp003664	C21H20O9	Apigenin-6-C-rhamnoside	Flavonoids	Flavonoid	-	B	55659	9	9	9	68406	48257	0.433113	2.09552	1.0673	insig
Lmbp003668	C20H18O10	Kaempferol-3-O-arabinoside	Flavonoids	Flavonoid	-	B	25302	9	9	9	27614	28975	0.439235	2.23531	1.16047	insig
Lmyp004617	C21H22O9	Pinocembrin-7-O-glucoside (Pinocembroside)	Flavonoids	Flavonoid	75829-43-5	B	7525.3	9	9	9	7705.8	8869.1	0.439205	2.19849	1.13652	insig
mws0048	C21H20O10	Apigenin-8-C-Glucoside (Vitexin)	Flavonoids	Flavonoid carbonoside	3681-93-4	B	9050000	9	9	9	9510800	8584800	0.431157	1.99951	0.999647	insig
pme0321	C21H20O10	Kaempferol-7-O-rhamnoside	Flavonoids	Flavonols	20196-89-8	A	204360	9	9	9	196510	219620	0.432204	2.03612	1.02583	insig
Lmgp004731	C21H20O10	5,7,4'-Trihydroxyisoflavone-7-O-galactoside	Flavonoids	Isoflavones	-	B	18258	9	9	9	18320	25621	0.443894	2.40479	1.26591	insig
mws0072	C21H20O10	Apigenin-5-O-glucoside	Flavonoids	Flavonoid	28757-27-9	B	151130	9	9	9	141780	167000	0.432329	2.04296	1.03066	insig
pmp000413	C21H20O10	Genistein-8-C-glucoside	Flavonoids	Isoflavones	66026-80-0	B	3975900	9	9	9	4061800	4320600	0.433559	2.1083	1.07608	insig
mws1434	C21H20O10	Apigenin-6-C-glucoside (Isovitexin)	Flavonoids	Flavonoid carbonoside	29702-25-8	A	8722700	9	9	9	10356000	9764300	0.437113	2.30666	1.2058	insig
pmb3006	C21H20O10	Apigenin-7-O-glucoside(Cosmosiin)	Flavonoids	Flavonoid	578-74-5	B	357560	9	9	9	401500	417130	0.438504	2.2894	1.19497	insig
mws0895	C21H20O10	Genistein-7-O-Glucoside (Genistin)	Flavonoids	Isoflavones	529-59-9	B	9429.1	9	9	9	9606.8	7987.5	0.424986	1.86335	0.897902	insig
mws0919	C21H20O10	Kaempferol-3-O-rhamnoside (Afzelin)(Kaempferin)	Flavonoids	Flavonols	482-39-3	A	163960	9	9	9	160380	162500	0.430338	1.9691	0.977536	insig
mws2186	C20H18O11	Avicularin	Flavonoids	Flavonols	572-30-5	A	7368.8	9	9	9	20429	15433	0.498731	4.85609	2.2798	insig
Lmdp003509	C20H18O11	Quercetin-3-O-xyloside (Reynoutrin)	Flavonoids	Flavonols	549-32-6	B	147480	9	9	9	136090	134950	0.426196	1.83765	0.877858	insig
mws4183	C20H18O11	Quercetin-3-O-arabinoside (Guaijaverin)	Flavonoids	Flavonols	22255-13-6	B	111480	9	9	9	113360	133860	0.437303	2.21734	1.14883	insig
pme1611	C21H22O10	Isohemiphloin	Flavonoids	Flavonoid carbonoside	650903	B	69894	9	9	9	98632	75467	0.444358	2.49039	1.31637	insig
mws1179	C21H22O10	Naringenin-7-O-glucoside (Prunin)	Flavonoids	Dihydroflavone	529-55-5	B	519260	9	9	9	503510	437460	0.425858	1.81209	0.857655	insig
HJN090	C21H22O10	Butin-7-O-glucoside	Flavonoids	Flavonoid	-	A	544470	9	9	9	502660	457310	0.424514	1.76309	0.818103	insig
HJN087	C21H22O10	Naringenin-4'-O-glucoside	Flavonoids	Flavonoid	-	A	533870	9	9	9	498480	471340	0.426142	1.81654	0.861193	insig
mws2118	C21H24O10	Phloretin-2'-O-glucoside (Phlorizin)	Flavonoids	Chalcones	60-81-1	A	69981	9	9	9	73025	74347	0.434542	2.10547	1.07414	insig
mws1397	C22H18O10	Epicatechin gallate	Flavonoids	Flavanols	1257-08-5	A	10577000	9	9	9	10390000	10698000	0.431117	1.99376	0.99549	insig
mws0355	C22H18O10	Catechin gallate	Flavonoids	Flavanols	130405-40-2	A	10570000	9	9	9	10109000	11013000	0.431185	1.99829	0.998769	insig
pmn001697	C21H18O11	Apigenin-7-O-glucuronide	Flavonoids	Flavonoid	29741-09-1	B	24599	9	9	9	31832	32160	0.449827	2.59987	1.37844	insig
mws0045	C21H20O11	Quercetin-3-O-rhamnoside(Quercitrin)	Flavonoids	Flavonols	522-12-3	A	24101000	9	9	9	24678000	23847000	0.431492	2.0134	1.00963	insig
mws1608	C21H20O11	Luteolin-6-C-glucoside (Isoorientin)	Flavonoids	Flavonoid carbonoside	4261-42-1	B	1193000	9	9	9	1228900	1287200	0.433819	2.10903	1.07658	insig
Xmyp005654	C21H20O11	Kaempferol-4'-O-glucoside	Flavonoids	Flavonoid	-	B	314360	9	9	9	362100	300540	0.433816	2.10781	1.07574	insig
mws1299	C21H20O11	Luteolin-8-C-glucoside (Orientin)	Flavonoids	Flavonoid carbonoside	28608-75-5	B	646090	9	9	9	692640	705170	0.435263	2.16344	1.11333	insig
mws0089	C21H20O11	Kaempferol-7-O-glucoside	Flavonoids	Flavonols	16290-07-6	B	845470	9	9	9	881470	841440	0.432159	2.03778	1.027	insig
Lmlp003531	C21H20O11	Luteolin-3'-O-glucoside	Flavonoids	Flavonoid	5154-41-6	B	2947500	9	9	9	3094200	3088000	0.433391	2.09743	1.06862	insig
mws2209	C21H20O11	Kaempferol-3-O-glucoside (Astragalin)	Flavonoids	Flavonols	480-10-4	B	2981400	9	9	9	2927200	2899900	0.4302	1.95448	0.966782	insig
pmb0550	C21H21O11+	Cyanidin-3-O-glucoside (Kuromanin)	Flavonoids	Anthocyanins	47705-70-4	A	513360	9	9	9	454340	432170	0.423421	1.72683	0.78813	insig
Lmmn004625	C21H22O11	Dihydrokaempferol-7-O-glucoside	Flavonoids	Flavonols	-	B	108290	9	9	9	119880	106150	0.433691	2.087	1.06143	insig
HJN086	C21H22O11	Eriodictyol-3'-O-glucoside	Flavonoids	Dihydroflavone	-	B	21248	9	9	9	18269	11308	0.400629	1.39123	0.476366	insig
HJN041	C21H24O11	Epicatechin glucoside	Flavonoids	Flavanols	-	B	67426	9	9	9	81972	69354	0.438299	2.24386	1.16598	insig
mws0034	C22H18O11	Epigallocatechin-3-gallate	Flavonoids	Flavanols	989-51-5	A	14610000	9	9	9	15894000	15541000	0.434163	2.15161	1.10541	insig
mws2220	C22H18O11	Gallocatechin 3-O-gallate	Flavonoids	Flavanols	5127-64-0	A	23117000	9	9	9	24152000	21489000	0.430651	1.97435	0.981375	insig
Lmzn001894	C21H18O12	Kaempferol-3-O-glucuronide	Flavonoids	Flavonols	22688-78-4	B	66080	9	9	9	72511	58035	0.429941	1.97517	0.981979	insig
Hmcp002539	C22H22O11	Isorhamnetin-3-O-rhamnoside	Flavonoids	Flavonols	-	B	343440	9	9	9	339500	377640	0.433528	2.08803	1.06214	insig
mws0061	C21H20O12	Quercetin-3-O-galactoside (Hyperin)	Flavonoids	Flavonols	482-36-0	B	2518800	9	9	9	2587200	2290600	0.429648	1.93655	0.953486	insig
mws0091	C21H20O12	Quercetin-3-O-glucoside (Isoquercitrin)	Flavonoids	Flavonols	482-35-9	B	1803300	9	9	9	1833000	1597800	0.428734	1.9025	0.927895	insig
mws0056	C21H20O12	Myricetin-3-O-rhamnoside (Myricitrin)	Flavonoids	Flavonols	17912-87-7	B	10501000	9	9	9	11407000	10790000	0.433487	2.1138	1.07984	insig
Lmzp002365	C22H24O11	Hesperetin-7-O-glucoside	Flavonoids	Flavonoid	31712-49-9	B	45409	9	9	9	43463	49869	0.432945	2.05475	1.03896	insig
pme1598	C22H24O11	Hesperetin-5-O-glucoside	Flavonoids	Dihydroflavonol	69651-80-5	B	1304100	9	9	9	1384100	1267500	0.431973	2.03326	1.02379	insig
Xmsn002700	C21H22O12	Taxifolin-3'-O-glucoside	Flavonoids	Flavonoid	31106-05-5	B	14051	9	9	9	16401	13456	0.435451	2.12282	1.08598	insig
pmp000583	C22H20O12	Diosmetin-7-O-glucuronide	Flavonoids	Flavonoid	35110-20-4	A	106280	9	9	9	127680	117690	0.439857	2.30841	1.2069	insig
Hmcp002207	C22H22O12	Isorhamnetin-7-O-glucoside (Brassicin)	Flavonoids	Flavonols	6743-96-0	A	345580	9	9	9	339360	352260	0.43128	2.00125	1.0009	insig
Lmjp002906	C22H22O12	Rhamnetin-3-O-Glucoside	Flavonoids	Flavonols	27875-34-9	A	340220	9	9	9	303010	337610	0.427879	1.88288	0.912945	insig
Lmyp004444	C22H22O12	Tricin-4'-methylether-3'-O-glucoside	Flavonoids	Flavonols	-	A	367600	9	9	9	317570	335880	0.424794	1.77755	0.829889	insig
Lmmp003903	C23H22O12	Kaempferol-3-O-(2''-acetyl)glucoside	Flavonoids	Flavonols	-	B	42486	9	9	9	39443	37169	0.424083	1.80268	0.850141	insig
HJAP112	C23H22O12	Quercetin-3-O-(2''-acetyl)rhamnoside	Flavonoids	Flavonols	-	B	38871	9	9	9	43428	38375	0.434541	2.10373	1.07295	insig
pmb0736	C23H24O12	Tricin-7-O-Glucoside	Flavonoids	Flavonoid	32769-01-0	A	27810	9	9	9	27865	27083	0.430357	1.97488	0.981766	insig
pmb3042	C23H24O12	Tricin-5-O-Glucoside	Flavonoids	Flavonoid	32769-00-9	B	29264	9	9	9	44054	37549	0.453791	2.7871	1.47877	insig
pmn001642	C23H20O13	Kaempferol-3-O-(2''-O-acetyl)glucuronide	Flavonoids	Flavonols	-	B	10115	9	9	9	9879.1	14295	0.444118	2.38657	1.25494	insig
Hmln002199	C23H22O13	Quercetin-3-O-(6''-acetyl)galactoside	Flavonoids	Flavonols	-	B	19164	9	9	9	27789	28531	0.458941	2.93656	1.55412	insig
Hmcp002399	C23H24O13	Limocitrin-3-O-glucoside	Flavonoids	Flavonoid	-	A	339940	9	9	9	384470	407070	0.43943	2.32837	1.21932	insig
Hmcp002187	C23H24O13	Limocitrin-3-O-galactoside	Flavonoids	Flavonoid	-	A	368970	9	9	9	377730	409650	0.434708	2.13391	1.0935	insig
pmb0554	C24H23O13+	Pelargonidin-3-O-(6''-O-malonyl)glucoside	Flavonoids	Anthocyanins	165070-68-8	B	80720	9	9	9	73238	75832	0.426172	1.84645	0.884757	insig
Lmtp002942	C25H26O13	Apigenin-6,8-di-C-arabinoside	Flavonoids	Flavonoid carbonoside	-	B	32030	9	9	9	29671	31968	0.428494	1.92361	0.94382	insig
pmb0542	C24H23O14+	Cyanidin-3-O-(6''-O-malonyl)glucoside	Flavonoids	Anthocyanins	171828-62-9	B	161010	9	9	9	168950	169210	0.434104	2.10006	1.07043	insig
HJAP064	C25H24O15	Isorhamnetin-3-O-(6''-malonylglucoside)	Flavonoids	Flavonoid	-	B	6438.9	9	9	9	5676.6	6443.9	0.425747	1.87853	0.909606	insig
Lmtp002474	C26H28O14	Apigenin-6-C-(2''-glucosyl)arabinoside	Flavonoids	Flavonoid carbonoside	-	B	71719	9	9	9	91280	80116	0.442271	2.38935	1.25662	insig
Lmnp102580	C26H28O14	Apigenin-6-C-(2''-xylosyl)glucoside	Flavonoids	Flavonoid carbonoside	-	B	76523	9	9	9	66245	60840	0.419141	1.66047	0.731591	insig
Lmpp003930	C30H26O12	Apigenin-7-O-(6''-p-Coumaryl)glucoside	Flavonoids	Flavonoid	-	B	211090	9	9	9	196580	215110	0.429764	1.95018	0.963609	insig
pme3227	C27H30O14	Vitexin-2''-O-rhamnoside	Flavonoids	Flavonoid carbonoside	64820-99-1	B	27404	9	9	9	26068	23923	0.424485	1.82335	0.866594	insig
Lmyp004963	C27H30O14	Apigenin-6-C-(2''-rhamnosyl)glucoside	Flavonoids	Flavonoid carbonoside	-	B	162860	9	9	9	155520	153710	0.428181	1.89859	0.924931	insig
pme2493	C27H30O14	Kaempferol-3,7-O-dirhamnoside (Kaempferitrin)	Flavonoids	Flavonols	482-38-2	B	64577	9	9	9	50498	71647	0.426605	1.89108	0.919207	insig
HJAP148	C26H28O15	Kaempferol-3-O-sambubioside	Flavonoids	Flavonoid	27661-51-4	B	96993	9	9	9	100880	84323	0.428038	1.90919	0.932957	insig
Hmjn004446	C30H26O13	Luteolin-7-O-(6''-caffeoyl)rhamnoside	Flavonoids	Flavonoid	-	A	27311	9	9	9	28263	29544	0.435279	2.11555	1.08104	insig
Hmcp001829	C27H30O15	Quercetin-3,7-Di-O-rhamnoside	Flavonoids	Flavonols	28638-13-3	B	11637	9	9	9	13274	12169	0.438206	2.18378	1.12683	insig
Lmsn002815	C27H30O15	Kaempferol-3-O-rutinoside(Nicotiflorin)	Flavonoids	Flavonoid	17650-84-9	A	115760	9	9	9	121300	127130	0.435496	2.14582	1.10153	insig
pmp001106	C27H30O15	Vitexin-2''-O-glucoside	Flavonoids	Flavonoid carbonoside	61360-94-9	B	9663.7	9	9	9	11481	7472.7	0.427305	1.95861	0.969832	insig
pmp000593	C27H30O15	Luteolin-7-O-rutinoside	Flavonoids	Flavonoid	3563-98-2	B	341050	9	9	9	316520	344410	0.429489	1.93785	0.954458	insig
Lmjp002867	C27H30O15	Kaempferol-3-O-neohesperidoside	Flavonoids	Flavonols	32602-81-6	A	753930	9	9	9	796590	745470	0.432335	2.04533	1.03233	insig
mws1073	C27H30O15	Apigenin-6,8-di-C-glucoside	Flavonoids	Flavonoid	23666-13-9	B	43431	9	9	9	39918	42891	0.427963	1.9061	0.930621	insig
Lmjp002596	C26H28O16	Quercetin-3-O-xylosyl(1→2)glucoside	Flavonoids	Flavonols	-	B	21194	9	9	9	30574	16463	0.434775	2.2179	1.14919	insig
mws1661	C28H32O15	Diosmetin-7-O-rutinoside (Diosmin)	Flavonoids	Flavonoid	520-27-4	B	224970	9	9	9	213130	208720	0.427557	1.87503	0.906913	insig
Lmmp000897	C30H26O14	Gallocatechin-Gallocatechin	Flavonoids	Flavanols	-	B	16656	9	9	9	12821	15678	0.41873	1.70973	0.773767	insig
mws0059	C27H30O16	Quercetin-3-O-rutinoside (Rutin)	Flavonoids	Flavonols	153-18-4	B	231280	9	9	9	212280	220930	0.427511	1.87299	0.905344	insig
Zmxp003107	C27H30O16	Luteolin-7,3'-di-O-glucoside	Flavonoids	Flavonoid	52187-80-1	B	19780	9	9	9	24172	20814	0.440435	2.2727	1.18441	insig
Lmbp002592	C27H30O16	Kaempferol-3,7-di-O-glucoside	Flavonoids	Flavonoid	-	B	170900	9	9	9	168700	182780	0.43284	2.05648	1.04018	insig
pme1777	C27H31O16+	Cyanidin-3,5-O-diglucoside (Cyanin)	Flavonoids	Anthocyanins	2611-67-8	B	123830	9	9	9	124160	118720	0.430039	1.96119	0.971727	insig
Lmyp003139	C28H24O16	Quercetin-3-O-(6''-galloyl)galactoside	Flavonoids	Flavonols	53171-28-1	A	12881	9	9	9	12719	17305	0.442222	2.32832	1.21929	insig
Lmyp003349	C28H24O16	Quercetin-3-O-(6''-galloyl)glucoside	Flavonoids	Flavonols	56316-75-7	B	12888	9	9	9	16025	22666	0.4608	2.99861	1.58429	insig
Hmlp002975	C28H30O17	Isorhamnetin-3-O-glucuronide-7-O-rhamnoside	Flavonoids	Flavonols	-	A	6031.5	9	9	9	8515.2	11329	0.471709	3.28179	1.71448	insig
pme1786	C29H35O17+	Malvidin-3,5-di-O-glucoside (Malvin)	Flavonoids	Anthocyanins	-	A	1111400	9	9	9	1122500	1136800	0.432044	2.03282	1.02348	insig
pmb2947	C45H38O18	Catechin-catechin-catechin	Flavonoids	Flavanols	-	A	55713	9	9	9	77796	53274	0.440388	2.35199	1.23388	insig
MWSHY0149	C15H10O3	5-Hydroxyflavone	Flavonoids	Flavones	491-78-1	1	114940	110760	116260	9	9	9	1.29355	7.89566e-05	-13.6286	down
mws1662	C16H12O4	Tectochrysin	Flavonoids	Flavones	520-28-5	3	9249.8	7864.8	7765.9	9	9	9	1.29342	0.00108519	-9.84784	down
mws0055	C20H20O7	Tangeretin (4',5,6,7,8-Pentamethoxyflavone)	Flavonoids	Flavones	481-53-8	1	277460	302990	261770	9	9	9	1.29362	3.20581e-05	-14.929	down
mws0043	C21H22O8	Nobiletin (5,6,7,8,3',4'-Hexamethoxyflavone)	Flavonoids	Flavones	478-01-3	3	239950	239680	248340	9	9	9	1.29357	3.70894e-05	-14.7186	down
HJAP012	C20H18O10	Luteolin-8-C-arabinoside	Flavonoids	Flavonoid carbonoside	-	2	57694	51044	74068	9	9	9	1.29297	0.000147698	-12.7251	down
pmp000117	C22H24O9	3,5,6,7,8,3',4'-Heptamethoxyflavone	Flavonoids	Flavonols	1178-24-1	3	4262.8	5656.6	4481.1	9	9	9	1.29329	0.00187493	-9.05894	down
Lmfn004093	C21H24O10	Phloretin-4'-O-glucoside (Trilobatin)	Flavonoids	Chalcones	4192-90-9	2	704440	630960	790030	9	9	9	1.2934	1.27033e-05	-16.2644	down
mws1361	C21H22O11	Taxifolin-3-O-rhamnoside (Astilbin)	Flavonoids	Flavanonols	29838-67-3	3	5422.5	5019	13820	9	9	9	1.28671	0.00111287	-9.81149	down
Lmpn006208	C22H22O11	8-Methoxykaempferol-7-O-rhamnoside	Flavonoids	Flavonols	-	3	303480	280380	315370	9	9	9	1.2935	3.00257e-05	-15.0234	down
pmn001527	C22H32O12	Di-O-galloyl Methyl gallate	Flavonoids	Flavanols	-	3	9002.6	16046	11492	9	9	9	1.29244	0.000738904	-10.4023	down
Lmmn003398	C23H22O12	Kaempferol-3-O-(6''-acetyl)glucoside	Flavonoids	Flavonols	-	3	17879	11279	9119.5	9	9	9	1.29177	0.000705375	-10.4693	down
mws0036	C28H34O15	Hesperetin-7-O-rutinoside (Hesperidin)*	Flavonoids	Flavanones	520-26-3	3	12883	10184	16734	9	9	9	1.29222	0.000678375	-10.5256	down
pme0001	C28H34O15	Hesperetin-7-O-neohesperidoside(Neohesperidin)*	Flavonoids	Flavanones	13241-33-3	3	14190	14692	14853	9	9	9	1.29357	0.000617355	-10.6616	down
mws1012	C9H6O2	Coumarin	Lignans and Coumarins	Coumarins	91-64-5	2	43994	43622	49952	1589000	1577300	1578900	1.29339	34.4935	5.10825	up
mws0097	C20H22O6	Pinoresinol*	Lignans and Coumarins	Lignans	487-36-5	1	74893	68356	62064	206510	194250	195520	1.28572	2.90425	1.53816	up
Lmmn003748	C20H24O6	Isolariciresinol	Lignans and Coumarins	Lignans	548-29-8	3	8859.9	7703.7	7729.1	541620	543070	570200	1.29328	68.1229	6.09007	up
Lmdn004267	C20H22O6	Epipinoresinol*	Lignans and Coumarins	Lignans	24404-50-0	1	67064	67826	69518	182900	158260	174300	1.28821	2.52172	1.33441	up
pmn001663	C22H26O8	Syringaresinol	Lignans and Coumarins	Lignans	21453-69-0	3	2072.9	2199.7	3520.8	3154.1	2528.4	2589.5	0.297992	1.06141	0.0859833	insig
mws1013	C9H6O4	Esculetin	Lignans and Coumarins	Coumarins	305-01-1	B	318400	9	9	9	295790	307530	0.428266	1.89477	0.922023	insig
mws1074	C9H6O4	Daphnetin	Lignans and Coumarins	Coumarins	486-35-1	B	91584	9	9	9	93669	106270	0.436559	2.18279	1.12617	insig
Zmjn003263	C10H8O4	6,8-Dihydroxy-3-methylisocoumarin	Lignans and Coumarins	Coumarins	1204-37-1	B	83349	9	9	9	87058	85689	0.433474	2.07223	1.05119	insig
Cmpp007319	C15H16O4	7-Methoxy-5-Prenyloxycoumarin	Lignans and Coumarins	Coumarins	35590-41-1	A	798640	9	9	9	771050	750350	0.428769	1.90496	0.929758	insig
mws1077	C16H18O9	Scopoletin-7-O-glucoside (Scopolin)	Lignans and Coumarins	Coumarins	531-44-2	B	66436	9	9	9	52236	60218	0.420162	1.69234	0.759022	insig
Lmgp003270	C16H16O10	Scopoletin-7-O-glucuronide	Lignans and Coumarins	Coumarins	132752-65-9	B	25104	9	9	9	18960	24422	0.419904	1.72721	0.788445	insig
pmn001378	C26H32O11	Pinoresinol-4-O-glucoside	Lignans and Coumarins	Lignans	41607-20-9	B	89410	9	9	9	80211	77067	0.423108	1.75881	0.814601	insig
Lmmn002274	C26H34O11	Isolariciresinol-9'-O-glucoside	Lignans and Coumarins	Lignans	63358-12-3	B	79760	9	9	9	83053	57259	0.421694	1.75889	0.814668	insig
Lmbn001181	C22H28O15	Fraxetin-7,8-di-O-glucoside	Lignans and Coumarins	Coumarins	-	B	39042	9	9	9	33080	32827	0.419406	1.68756	0.754937	insig
mws1014	C10H8O5	Fraxetin (7,8-Dihydroxy-6-methoxycoumarin)	Lignans and Coumarins	Coumarins	574-84-5	2	282850	321850	245360	14207	13088	12555	1.29202	0.046879	-4.41491	down
pme2987	C9H8O2	3,4-Dihydrocoumarin	Lignans and Coumarins	Coumarins	119-84-6	3	23133	21793	17821	9	9	9	1.29345	0.000430299	-11.1824	down
pme2996	C9H6O3	4-Hydroxycoumarin*	Lignans and Coumarins	Coumarins	1076-38-6	3	19194	15021	18522	9	9	9	1.29317	0.000511975	-10.9316	down
Hmqn002118	C9H6O3	7-Hydroxycoumarin*	Lignans and Coumarins	Coumarins	93-35-6	3	12116	8113.8	8787.8	9	9	9	1.29271	0.00093047	-10.0698	down
mws1075	C10H8O3	7-Methoxycoumarin	Lignans and Coumarins	Coumarins	531-59-9	3	17698	26420	18288	9	9	9	1.29313	0.000432651	-11.1745	down
mws4173	C11H10O4	5,7-Dimethoxycoumarin (Limettin)(Citropten)	Lignans and Coumarins	Coumarins	487-06-9	3	94040	88789	102550	9	9	9	1.29345	9.4611e-05	-13.3676	down
Zmln002252	C10H8O6	Sideretin (5,7,8-Trihydroxy-6-methoxycoumarin)	Lignans and Coumarins	Coumarins	-	2	84957	47128	54820	9	9	9	1.29244	0.000144458	-12.7571	down
Zmyn005384	C18H36O3	2R-Hydroxyoctadecanoic Acid	Lipids	Free fatty acids	26633-48-7	1	38078	32887	30529	129070	111280	133890	1.28259	3.68731	1.88257	up
Zmyn004714	C18H34O3	Ricinoleic acid	Lipids	Free fatty acids	141-22-0	2	45302	38814	41525	92528	88465	88349	1.28432	2.14374	1.10013	up
Zmpn003368	C18H30O3	13S-Hydroxy-9Z,11E,15Z-octadecatrienoic acid	Lipids	Free fatty acids	87984-82-5	2	10496	10874	9382	70143	69092	67039	1.29161	6.70766	2.74581	up
Zmjn003398	C12H20O4	2-Dodecenedioic acid	Lipids	Free fatty acids	6402-36-4	2	30225	21575	31774	108950	104580	109650	1.27489	3.86699	1.95121	up
YC512118	C18H35NO	Oleamide (9-Octadecenamide)	Lipids	Free fatty acids	301-02-0	1	57285	64443	63522	509970	496790	501010	1.29271	8.13911	3.02487	up
pmp001273	C26H50NO7P	LysoPC 18:2	Lipids	LPC	-	1	935350	916400	790110	3537200	3525900	3512900	1.28926	4.00324	2.00117	up
pmp001251	C26H50NO7P	LysoPC 18:2(2n isomer)	Lipids	LPC	-	1	414140	410310	413220	10625000	10691000	10513000	1.29358	25.7169	4.68464	up
pmn001691	C18H32O5	9,12,13-Trihydroxy-10,15-octadecadienoic acid	Lipids	Free fatty acids	-	1	14305	11524	16430	29016	26574	29478	1.24024	2.01301	1.00936	up
pmd0136	C26H54NO7P	LysoPC 18:0(2n isomer)	Lipids	LPC	-	1	43296	24418	51912	78374	90833	88429	1.12808	2.15368	1.1068	up
pmd0132	C24H50NO7P	LysoPC 16:0(2n isomer)	Lipids	LPC	-	1	52567	52978	48849	452970	463710	497270	1.29271	9.15806	3.19504	up
pmd0130	C22H46NO7P	LysoPC 14:0	Lipids	LPC	20559-16-4	3	14893	10627	14880	32278	34750	36681	1.25749	2.56705	1.36011	up
pmb0889	C18H30O2	Punicic acid (9Z,11E,13Z-octadecatrienoic acid)	Lipids	Free fatty acids	544-72-9	1	299220	332440	337240	3123100	3088100	3212800	1.29287	9.72649	3.28192	up
pmb0883	C23H48NO7P	LysoPE 18:0	Lipids	LPE	69747-55-3	3	31619	34341	33744	462210	463190	474020	1.29331	14.0357	3.81103	up
pmb0881	C23H44NO7P	LysoPE 18:2	Lipids	LPE	-	1	372330	409220	418130	905880	818770	903200	1.28416	2.19046	1.13123	up
pmb0865	C26H48NO7P	LysoPC 18:3(2n isomer)	Lipids	LPC	-	1	58595	66038	64182	616970	609450	630450	1.29286	9.83434	3.29783	up
pmb0855	C24H50NO7P	LysoPC 16:0	Lipids	LPC	17364-16-8	1	754740	740640	781130	3530200	3930400	3831700	1.29241	4.96036	2.31044	up
pmb0854	C26H48NO7P	LysoPC 18:3	Lipids	LPC	-	1	17470	17460	17505	590550	600100	646020	1.29349	35.0276	5.13042	up
mws5045	C12H24O3	12-Hydroxydodecanoic acid	Lipids	Free fatty acids	505-95-3	2	9793.2	14226	12561	27765	29552	27705	1.25046	2.32426	1.21677	up
mws1491	C18H32O2	Linoleic acid	Lipids	Free fatty acids	60-33-3	1	14508000	11005000	12791000	39547000	39573000	42846000	1.28114	3.18416	1.67091	up
mws1436	C18H38O2	1,18-Octadecanediol	Lipids	Free fatty acids	3155-43-9	2	11928	10734	13582	29857	32342	27061	1.27194	2.46275	1.30027	up
mws0383	C17H32O2	10-Heptadecenoic Acid	Lipids	Free fatty acids	29743-97-3	1	7193200	7475700	7093900	16900000	16081000	16181000	1.29137	2.25899	1.17568	up
mws0369	C20H32O2	Arachidonic Acid	Lipids	Free fatty acids	506-32-1	3	28732	30082	26866	177260	162620	185790	1.29141	6.13527	2.61713	up
mws0367	C18H30O2	α-Linolenic Acid*	Lipids	Free fatty acids	463-40-1	1	11867000	11370000	11292000	23367000	24012000	24120000	1.29191	2.07069	1.05011	up
mws0366	C18H30O2	γ-Linolenic Acid*	Lipids	Free fatty acids	506-26-3	1	9816300	10787000	10690000	23278000	22979000	23773000	1.28964	2.23786	1.16212	up
mws0362	C17H34O2	Heptadecanoic acid	Lipids	Free fatty acids	506-12-7	2	58491	51986	49959	467730	466250	400930	1.29056	8.32051	3.05667	up
mws0126	C26H54NO7P	LysoPC 18:0	Lipids	LPC	19420-57-6	1	96855	85332	90743	376110	469660	398870	1.28708	4.56029	2.18913	up
mws0120	C8H20NO6P	Choline Alfoscerate	Lipids	PC	28319-77-9	3	5024.9	6700.7	4998.7	2352900	2340600	2240600	1.29263	414.612	8.69562	up
Lmsn004901	C24H48O2	Tetracosanoic Acid (Lignoceric acid)	Lipids	Free fatty acids	557-59-5	3	15810	12287	12419	25846	25371	34477	1.22366	2.11507	1.0807	up
Lmhp112042	C21H38O4	1-Linoleoylglycerol	Lipids	Glycerol ester	2277-28-3	2	16051	13600	18040	120810	134910	131530	1.28969	8.11998	3.02148	up
Lmhp012042	C21H38O4	2-Linoleoylglycerol	Lipids	Glycerol ester	3443-82-1	2	23929	23329	23048	319020	344880	333480	1.2933	14.1863	3.82642	up
Lmhp011562	C21H36O4	1-α-Linolenoyl-glycerol	Lipids	Glycerol ester	-	3	14790	14049	15964	43986	49368	46311	1.28906	3.11731	1.6403	up
Lmhp011388	C21H36O4	2-α-Linolenoyl-glycerol	Lipids	Glycerol ester	55268-58-1	3	5441.6	5491.2	5294.9	120330	118070	113840	1.29339	21.7061	4.44003	up
Lmhp010757	C25H48NO7P	LysoPE 20:2	Lipids	LPE	-	3	4450.1	4258.8	5761.8	30313	36105	35840	1.28626	7.06656	2.82101	up
Lmhp010514	C25H48NO7P	LysoPE 20:2(2n isomer)	Lipids	LPE	-	3	1760.5	1143.4	1312.1	104340	109010	115160	1.29151	77.9198	6.28392	up
Lmhp010190	C26H52NO7P	LysoPC 18:1(2n isomer)	Lipids	LPC	-	1	654330	627330	691460	3673700	3500300	3374800	1.29256	5.34625	2.41853	up
Lmhp010040	C25H46NO7P	LysoPE 20:3	Lipids	LPE	-	3	7800.2	9276.5	5803.8	273910	289970	298890	1.28917	37.7077	5.23679	up
Lmhp009802	C25H46NO7P	LysoPE 20:3(2n isomer)	Lipids	LPE	-	3	5429.6	3658.1	4485.8	173820	177190	213970	1.29081	41.6238	5.37934	up
Lmhp009497	C25H44NO7P	LysoPE 20:4	Lipids	LPE	-	2	115830	122550	122150	1200600	1157900	1142200	1.29329	9.70987	3.27945	up
Lmhp009464	C22H44NO7P	LysoPE 17:1(2n isomer)	Lipids	LPE	-	1	392940	359210	367970	794880	809550	804910	1.29047	2.15097	1.10498	up
Lmhp009384	C33H58O14	1-Linoleoylglycerol-2,3-di-O-glucoside	Lipids	Glycerol ester	-	3	10554	7066.3	11732	18963	18588	21560	1.18464	2.01385	1.00995	up
Lmhp008688	C25H42NO7P	LysoPE 20:5	Lipids	LPE	-	2	11351	9146.9	11015	151820	129650	126600	1.29091	12.9493	3.6948	up
Lmhp007595	C24H42NO7P	LysoPC 16:4	Lipids	LPC	-	3	5934.7	4696.2	7834.3	13004	15012	13549	1.21582	2.25099	1.17056	up
Lmbn005662	C18H32O3	9(10)-EpOME;(9R,10S)-(12Z)-9,10-Epoxyoctadecenoic acid*	Lipids	Free fatty acids	16833-56-0	1	20432	21632	19509	83414	76988	81295	1.2913	3.92537	1.97283	up
Lmbn005369	C18H32O3	13(S)-HODE;13(S)-Hydroxyoctadeca-9Z,11E-dienoic acid*	Lipids	Free fatty acids	10219-69-9	1	208500	210440	216770	1356900	1342800	1369000	1.29357	6.40025	2.67813	up
pmp001284	C19H38O4	Monopalmitin	Lipids	Glycerol ester	542-44-9	1	214520	199510	226330	108710	106000	107260	1.28501	0.502795	-0.991957	insig
pmn001694	C18H34O5	9,10,13-Trihydroxy-11-Octadecenoic Acid*	Lipids	Free fatty acids	29907-57-1	1	473900	478950	496080	944870	918640	897500	1.29123	1.90555	0.930208	insig
pmn001686	C16H32O4	10,16-Dihydroxypalmitic acid	Lipids	Free fatty acids	3233-90-7	1	5910.2	6779.4	6373.3	5604.7	6080.5	6040.4	0.783448	0.929848	-0.104933	insig
pmf0297	C20H42O	1-Eicosanol	Lipids	Free fatty acids	629-96-9	3	51196	44667	42119	78242	85133	85275	1.26349	1.80205	0.849636	insig
pme2827	C16H32O	Palmitaldehyde	Lipids	Free fatty acids	629-80-1	1	17818000	18946000	18150000	21838000	21126000	22386000	1.24378	1.19004	0.251013	insig
pmb2792	C18H30O3	13-Hydroxy-6,9,11-octadecatrienoic acid	Lipids	Free fatty acids	74784-20-6	3	148620	144320	161730	184110	186190	177050	1.20296	1.20384	0.267644	insig
pmb2791	C18H30O4	9-Hydroperoxy-10E,12,15Z-octadecatrienoic acid	Lipids	Free fatty acids	111004-08-1	3	69579	66918	73175	103000	92131	92281	1.24509	1.37077	0.454986	insig
pmb2643	C14H26O2	Myristoleic acid	Lipids	Free fatty acids	544-64-9	1	59420	59299	55787	83247	69701	73274	1.18278	1.29636	0.374463	insig
pmb2260	C23H46NO7P	LysoPC 15:1	Lipids	LPC	-	3	11847	15859	14364	13598	14385	11257	0.376002	0.932731	-0.100467	insig
pmb0876	C21H44NO7P	LysoPE 16:0	Lipids	LPE	53862-35-4	1	1890100	1923600	2000600	2567200	2481200	2479200	1.27861	1.29467	0.372584	insig
mws0752	C11H22O2	Undecylic Acid	Lipids	Free fatty acids	112-37-8	1	8625900	8869500	9029300	5240600	5458800	5304500	1.29031	0.603358	-0.728913	insig
mws0751	C13H26O2	Tridecanoic Acid	Lipids	Free fatty acids	638-53-9	1	30295	30551	31785	35310	36141	36547	1.2611	1.16589	0.221438	insig
mws0474	C12H22O4	Dodecanedioic aicd	Lipids	Free fatty acids	693-23-2	1	19341	6982	6121.9	9522	7918.8	7965.5	0.185483	0.78306	-0.352805	insig
mws0397	C20H30O2	Cis-5,8,11,14,17-Eicosapentaenoic Acid	Lipids	Free fatty acids	10417-94-4	3	17372	17945	18143	12263	11649	11080	1.27923	0.654545	-0.611435	insig
mws0396	C18H34O2	Elaidic Acid*	Lipids	Free fatty acids	112-79-8	1	21863000	23269000	22673000	41112000	40817000	46162000	1.2817	1.88911	0.917706	insig
mws0371	C22H32O2	Cis-4,7,10,13,16,19-Docosahexaenoic Acid	Lipids	Free fatty acids	6217-54-5	2	18886	23130	18290	23669	27749	25254	1.04818	1.27138	0.346398	insig
mws0361	C16H30O2	Palmitoleic Acid	Lipids	Free fatty acids	373-49-9	1	91919	82892	73999	60771	43729	36904	1.13661	0.568321	-0.815222	insig
Lmhp010099	C30H52NO7P	LysoPC 22:5	Lipids	LPC	-	3	40848	38710	45847	35927	36493	28975	0.993235	0.80854	-0.306608	insig
Lmhp010041	C27H46NO7P	LysoPE 22:5	Lipids	LPE	-	3	16410	16880	19525	29730	31875	26893	1.2454	1.67562	0.744697	insig
Lmhp009769	C22H44NO7P	LysoPE 17:1	Lipids	LPE	-	1	604910	618330	572740	778580	808150	796250	1.272	1.32684	0.407996	insig
Lmhp009590	C25H50NO7P	LysoPC 17:1	Lipids	LPC	-	1	145380	138060	160480	77192	71890	80117	1.27477	0.516307	-0.953699	insig
Lmhp008833	C24H48NO7P	LysoPC 16:1(2n isomer)	Lipids	LPC	-	1	232850	247990	252180	470590	469370	434390	1.2851	1.87491	0.906825	insig
Lmbn006152	C18H32O2	(9Z,11E)-Octadecadienoic acid	Lipids	Free fatty acids	2540-56-9	3	46340	41248	43106	31483	27371	35532	1.15399	0.722191	-0.469548	insig
Lmbn005923	C18H30O2	Crepenynic acid	Lipids	Free fatty acids	2277-31-8	1	87347	81696	77318	121590	127540	124220	1.27193	1.51546	0.599755	insig
Zmgn003633	C12H20O3	12-Oxo-10E-Dodecenoic Acid	Lipids	Free fatty acids	65410-38-0	B	6463.8	9	9	9	5274.8	5838.7	0.417677	1.71596	0.779015	insig
Hmsn000210	C17H30O2	Methyl 7,10-hexadecadienoate	Lipids	Free fatty acids	-	A	326540	9	9	9	286100	328830	0.427821	1.88309	0.913104	insig
pmf0293	C18H38O	1-Octadecanol	Lipids	Free fatty acids	112-92-5	B	59997	9	9	9	62052	67783	0.436308	2.16353	1.11338	insig
YC512117	C18H28O2	Stearidonic acid	Lipids	Free fatty acids	20290-75-9	B	4748.4	9	9	9	5451.6	4847.8	0.438379	2.16272	1.11285	insig
pmf0395	C18H34O2	Oleic acid	Lipids	Glycerol ester	112-80-1	B	13194	9	9	9	14706	13096	0.435147	2.10498	1.07381	insig
mws1489	C18H36O2	Stearic Acid	Lipids	Free fatty acids	21128	B	61413000	9	9	9	22599000	52351000	0.409343	1.22043	0.287384	insig
Zmyn005026	C18H36O2	16-Methylheptadecanoic acid	Lipids	Free fatty acids	2724-58-5	B	206640	9	9	9	76922	278730	0.410111	1.72101	0.783258	insig
pmb2787	C18H30O3	9-Oxo-10E,12Z-octadecadienoic acid	Lipids	Free fatty acids	54232-59-6	B	16681	9	9	9	14553	14374	0.420167	1.7328	0.793104	insig
Zmgn005057	C18H34O3	9,10-Epoxyoctadecanoic Acid	Lipids	Free fatty acids	2443-39-2	B	2874.5	9	9	9	3231.9	1870.4	0.414416	1.76709	0.821373	insig
pmn001606	C20H38O2	Eicosenoic acid	Lipids	Free fatty acids	26764-41-0	B	482080	9	9	9	631110	591260	0.443502	2.53554	1.34229	insig
Lmbn004685	C18H32O4	5S,8R-DiHODE; (5S,8R,9Z,12Z)-5,8-Dihydroxyoctadeca-9,12-dienoate	Lipids	Free fatty acids	-	B	15996	9	9	9	14778	13903	0.422686	1.79156	0.841214	insig
pmn001689	C18H32O4	9-Hydroxy-12-oxo-15(Z)-octadecenoic acid	Lipids	Free fatty acids	-	B	17631	9	9	9	16805	13413	0.418698	1.71267	0.776251	insig
mws0945	C20H30O3	15-Oxo-5Z,8Z,11Z,13E-eicosatetraenoic acid	Lipids	Free fatty acids	81416-72-0	B	9575.3	9	9	9	10479	7800.3	0.426238	1.90636	0.930822	insig
mws0954	C20H32O3	5-Hydroxy-6,8,11,14-eicosatetraenoic acid	Lipids	Free fatty acids	70608-72-9	B	5073	9	9	9	5775.6	4232.3	0.428602	1.96757	0.976415	insig
Lmbn004240	C18H34O5	9,10-Dihydroxy-12,13-epoxyoctadecanoic acid	Lipids	Free fatty acids	-	A	81446	9	9	9	78995	78926	0.429284	1.93865	0.955051	insig
pmb2165	C18H38NO7P	LysoPC 10:0	Lipids	LPC	22248-63-1	B	6937.1	9	9	9	7996.1	8966.6	0.448083	2.44018	1.28699	insig
Cmbn007148	C22H22O9	1-O-Feruloyl-3-O-caffeoylglycerol	Lipids	Glycerol ester	-	B	12863	9	9	9	12395	6709.4	0.402193	1.48384	0.56934	insig
pmb0862	C20H42NO7P	LysoPC 12:0	Lipids	LPC	20559-18-6	B	3740.5	9	9	9	4537.8	3995.4	0.443296	2.27277	1.18445	insig
Lmhp008233	C23H40NO7P	LysoPE 18:4	Lipids	LPE	-	B	7676.1	9	9	9	4835.8	6165.8	0.40098	1.43104	0.517069	insig
Lmhp008801	C23H42NO7P	LysoPE 18:3	Lipids	LPE	-	A	330710	9	9	9	336730	335030	0.432091	2.03118	1.02232	insig
Lmhp008589	C23H42NO7P	LysoPE 18:3(2n isomer)	Lipids	LPE	-	A	329450	9	9	9	341770	331460	0.432405	2.04341	1.03098	insig
pma1303	C24H46NO7P	LysoPC 16:2	Lipids	LPC	-	B	128560	9	9	9	132760	133900	0.433429	2.07399	1.05241	insig
Lmhp008718	C25H48NO7P	LysoPC 17:2	Lipids	LPC	-	B	26518	9	9	9	24780	27197	0.429732	1.95907	0.970172	insig
Lmhp009526	C27H46O9	2-α-Linolenoyl-glycerol-1-O-glucoside*	Lipids	Glycerol ester	-	B	6911.1	9	9	9	6871.9	7668.3	0.435493	2.09972	1.0702	insig
Lmhp009773	C27H46O9	1-α-Linolenoyl-glycerol-3-O-glucoside*	Lipids	Glycerol ester	-	B	2651	9	9	9	2937	3309.5	0.44728	2.34376	1.22883	insig
Hmqp006235	C21H46N3O9P	LysoPC 18:4	Lipids	LPC	-	B	22509	9	9	9	22385	24133	0.433611	2.06539	1.04641	insig
Lmhp010334	C27H48O9	2-Linoleoylglycerol-1-O-glucoside*	Lipids	Glycerol ester	-	B	2284.3	9	9	9	3144	2464.3	0.450922	2.43986	1.2868	insig
Lmhp010573	C27H48O9	1-Linoleoylglycerol-3-O-glucoside*	Lipids	Glycerol ester	-	B	1406.9	9	9	9	2837.9	2863.6	0.502942	4.00765	2.00276	insig
Lmhp010908	C27H54NO7P	LysoPC 19:1	Lipids	LPC	-	B	200670	9	9	9	202340	199660	0.431334	2.00315	1.00227	insig
pmb2228	C27H56NO7P	LysoPC 19:0	Lipids	LPC	108273-88-7	B	11028	9	9	9	10520	12866	0.435557	2.11796	1.08268	insig
Lmhp008742	C28H48NO7P	LysoPC 20:5	Lipids	LPC	162440-04-2	B	167110	9	9	9	175660	176050	0.434216	2.10449	1.07347	insig
pmc0960	C28H50NO7P	LysoPC 20:4	Lipids	LPC	-	A	650820	9	9	9	680310	658840	0.432687	2.05759	1.04096	insig
Lmhp009890	C28H52NO7P	LysoPC 20:3	Lipids	LPC	1199257-41-4	A	267060	9	9	9	281870	273640	0.433416	2.07999	1.05658	insig
pmd0147	C28H54NO7P	LysoPC 20:2	Lipids	LPC	-	B	312070	9	9	9	325480	317530	0.432868	2.06038	1.04291	insig
Lmhp011549	C28H56NO7P	LysoPC 20:1	Lipids	LPC	-	B	18884	9	9	9	21837	22176	0.442559	2.32896	1.21969	insig
Hmyn007087	C25H49O11P	LysoPI 16:0	Lipids	Glycerol ester	-	B	943.64	9	9	9	850.83	1301	0.444065	2.24703	1.16802	insig
Lmhp010394	C30H54NO7P	LysoPC 22:4	Lipids	LPC	-	B	178540	9	9	9	184060	191270	0.434127	2.10206	1.0718	insig
Hmyn006303	C27H47O12P	LysoPI 18:3	Lipids	Glycerol ester	-	B	1374.3	9	9	9	1428	1248.6	0.427817	1.92889	0.947774	insig
Zmyn005015	C18H37NO2	Palmitoylethanolamide	Lipids	Free fatty acids	544-31-0	3	20161	20203	20742	3857.1	4560.2	5599.4	1.27965	0.229383	-2.12417	down
Rfmb087	C18H32O4	9-Hydroxy-13-oxo-10-octadecenoic Acid	Lipids	Free fatty acids	-	1	1543800	1467700	1546500	259020	287680	247420	1.29172	0.174226	-2.52097	down
pmp001281	C26H52NO7P	LysoPC 18:1	Lipids	LPC	-	1	1412300	1448700	1436100	481550	621290	565130	1.27828	0.388162	-1.36527	down
pmp001270	C24H48NO7P	LysoPC 16:1	Lipids	LPC	76790-27-7	1	630290	599000	630180	81568	75205	53090	1.2845	0.112862	-3.14737	down
pmn001610	C20H36O2	Eicosadienoic acid	Lipids	Free fatty acids	5598-38-9	1	631730	658870	639300	205850	238500	100050	1.20109	0.282087	-1.82579	down
pmb2799	C18H32O3	12,13-Epoxy-9-Octadecenoic Acid*	Lipids	Free fatty acids	6799-85-5	1	23679	23922	23688	12079	8092.1	9786.3	1.25052	0.420225	-1.25077	down
pmb2640	C12H24O2	Dodecanoic acid (Lauric acid)	Lipids	Free fatty acids	143-07-7	1	9126300	9525100	9497300	197920	194530	182610	1.2935	0.0204294	-5.61321	down
pmb2406	C25H52NO7P	LysoPC 17:0	Lipids	LPC	50930-23-9	1	990110	1061800	1095000	75957	75398	83216	1.29271	0.0745401	-3.74584	down
pmb2319	C23H48NO7P	LysoPC 15:0	Lipids	LPC	108273-89-8	3	234830	244030	239430	73693	83304	78772	1.29097	0.328237	-1.60719	down
pmb0864	C19H40NO7P	LysoPE 14:0	Lipids	LPE	-	1	183440	174020	206060	24589	28898	26651	1.29009	0.14221	-2.81391	down
pmb0296	C21H40O4	1-Oleoyl-Sn-Glycerol	Lipids	Glycerol ester	129784-87-8	3	105240	126320	118350	47486	49997	50365	1.28296	0.422532	-1.24287	down
mws2623	C18H34O2	11-Octadecanoic acid(Vaccenic acid)	Lipids	Free fatty acids	506-17-2	1	35992000	37757000	36934000	11247000	10726000	12220000	1.29035	0.308927	-1.69466	down
mws0359	C15H30O2	Pentadecanoic Acid	Lipids	Free fatty acids	1002-84-2	1	7458200	6800000	6028500	2455100	2163400	2645000	1.27626	0.358042	-1.4818	down
mws0289	C23H46NO7P	LysoPE 18:1	Lipids	LPE	89576-29-4	1	1119600	1087000	1100900	499730	494710	552820	1.28723	0.467803	-1.09603	down
mws0119	C14H28O2	Myristic Acid	Lipids	Free fatty acids	544-63-8	1	34555000	36233000	39627000	9920100	9763900	10581000	1.28967	0.274102	-1.86721	down
Lmqn008288	C18H36O3	3-Hydroxyoctadecanoic Acid	Lipids	Free fatty acids	45261-96-9	2	6229300	6295300	6314300	1166500	1154000	1164200	1.29354	0.184974	-2.43461	down
Lmhp010162	C22H46NO7P	LysoPE 17:0	Lipids	LPE	-	2	291100	289130	327190	41183	36335	34712	1.29083	0.12368	-3.01531	down
Lmhp009368	C30H50NO7P	LysoPC 22:6	Lipids	LPC	-	1	194470	231890	202980	35496	38459	37216	1.29119	0.176647	-2.50106	down
Lmhp009187	C20H42NO7P	LysoPE 15:0	Lipids	LPE	-	1	67901	88953	72541	24871	28854	22152	1.26959	0.33077	-1.5961	down
Lmhp009034	C21H42NO7P	LysoPE 16:1	Lipids	LPE	-	1	4408600	4561600	4890500	68828	70735	60281	1.29311	0.014418	-6.11598	down
Lmhp008440	C20H40NO7P	LysoPE 15:1	Lipids	LPE	-	2	120210	123800	106200	26937	24002	22813	1.28927	0.210594	-2.24747	down
Lmhp008337	C19H40NO7P	LysoPE 14:0(2n isomer)	Lipids	LPE	-	1	83753	82032	85662	21613	21981	19661	1.29178	0.251564	-1.991	down
Lmbn005487	C18H34O4	12,13-DHOME; (9Z)-12,13-Dihydroxyoctadec-9-enoic acid	Lipids	Free fatty acids	263399-35-5	1	124030	125010	128820	60838	59529	60514	1.29248	0.478698	-1.06281	down
Hmyn007168	C22H45O9P	LysoPG 16:0	Lipids	Glycerol ester	-	3	15980	41207	42588	3760	6907.2	7406.5	1.1726	0.181145	-2.46479	down
Hmyn007081	C22H43O9P	LysoPG 16:1	Lipids	Glycerol ester	-	3	10713	11529	12377	1100.6	1086.9	1045.7	1.29257	0.0933938	-3.42053	down
pmb0302	C2H8NO3P	2-Aminoethylphosphonate	Lipids	Glycerol ester	2041-14-7	3	54330	34068	63357	9	9	9	1.29199	0.000177918	-12.4565	down
Lmyn008503	C8H16O2	Octanoic acid	Lipids	Free fatty acids	124-07-2	2	28635	30866	32135	9	9	9	1.29352	0.000294644	-11.7287	down
MWS3139	C10H18O3	10-Hydroxy-2-Decenoic Acid	Lipids	Free fatty acids	14113-05-4	1	112190	74892	134490	9	9	9	1.29237	8.39625e-05	-13.5399	down
MWS1900	C11H20O4	Undecanedioic acid	Lipids	Free fatty acids	1852-04-6	1	208470	156280	160150	9	9	9	1.29334	5.14384e-05	-14.2468	down
MWS0552	C15H28O2	Cis-10-Pentadecenoic Acid(C15: 1)	Lipids	Free fatty acids	84743-29-3	1	4840400	4920900	5097000	9	9	9	1.29357	1.81717e-06	-19.0699	down
MWS2430	C15H30O2	13-methylmyristic acid	Lipids	Free fatty acids	2485-71-4	1	8303900	7774900	7818100	9	9	9	1.29358	1.12985e-06	-19.7554	down
MWS5231	C13H24O4	Tridecanedioic acid	Lipids	Free fatty acids	505-52-2	1	728760	407170	427810	9	9	9	1.2928	1.72663e-05	-15.8217	down
Lmcn009122	C16H30O2	(7Z)-Hexadecenoic acid	Lipids	Free fatty acids	2416-19-5	1	136500	121270	113950	9	9	9	1.29354	7.26353e-05	-13.749	down
mws1488	C16H32O2	Palmitic acid	Lipids	Free fatty acids	21096	1	119780	127910	117990	9	9	9	1.29362	7.3835e-05	-13.7253	down
MWSslk133	C14H26O4	1,14-Tetradecanedioic Acid	Lipids	Free fatty acids	821-38-5	1	102420	71846	74302	9	9	9	1.29316	0.000108622	-13.1684	down
Lmxn015337	C17H34O2	Methyl palmitate	Lipids	Free fatty acids	112-39-0	2	47991	51135	49554	9	9	9	1.2936	0.000181598	-12.427	down
pmp001264	C16H35NO2	Hexadecylsphingosine	Lipids	Sphingolipids	-	1	40245000	36593000	31652000	9	9	9	1.29358	2.48871e-07	-21.9381	down
pmb1650	C18H30O2	Octadeca-11E,13E,15Z-trienoic acid	Lipids	Free fatty acids	25575-00-2	1	24570000	25566000	24773000	9	9	9	1.2936	3.60437e-07	-21.4037	down
Lmyn012331	C18H34O2	Petroselinic acid*	Lipids	Free fatty acids	593-39-5	1	33789000	33567000	33104000	9	9	9	1.29359	2.68764e-07	-21.8272	down
MWSslk132	C16H30O4	Hexadecanedioic acid	Lipids	Free fatty acids	505-54-4	2	126800	126000	133990	9	9	9	1.29354	6.98053e-05	-13.8063	down
Zmyn005252	C17H34O3	3-Hydroxy-palmitic acid methyl ester	Lipids	Free fatty acids	51883-36-4	3	12004	6307.9	9257.9	9	9	9	1.29138	0.000979332	-9.99591	down
Lmyn007883	C16H32O4	9,16-Dihydroxypalmitic acid	Lipids	Free fatty acids	38076-49-2	2	234970	222150	236530	9	9	9	1.29355	3.89245e-05	-14.649	down
MWSmce689	C19H32O2	Methyl linolenate	Lipids	Free fatty acids	301-00-8	3	15130	19877	21464	9	9	9	1.29305	0.000478122	-11.0303	down
Lmbn005443	C18H30O3	13-KODE; (9Z,11E)-13-Oxooctadeca-9,11-dienoic acid	Lipids	Free fatty acids	54739-30-9	3	10230	12129	11652	9	9	9	1.29349	0.000793861	-10.2988	down
pmb2786	C18H30O3	9-Hydroxy-10,12,15-octadecatrienoic acid	Lipids	Free fatty acids	89886-42-0	3	9859.6	9398.1	11282	9	9	9	1.2933	0.000884095	-10.1435	down
Zmyn004732	C18H30O3	2R-hydroxy-9Z,12Z,15Z-octadecatrienoic acid	Lipids	Free fatty acids	-	2	50874	50523	58310	9	9	9	1.29343	0.00016906	-12.5302	down
Zmyn004676	C18H30O3	17-Hydroxylinolenic acid	Lipids	Free fatty acids	-	2	10476	14100	15677	9	9	9	1.29282	0.000670757	-10.5419	down
Lmcn009539	C19H34O2	E,E,Z-1,3,12-Nonadecatriene-5,14-diol	Lipids	Free fatty acids	-	3	20267	26055	25319	9	9	9	1.29335	0.000376879	-11.3736	down
Hmqp005411	C18H32O3	9-Oxo-12Z-Octadecenoic acid*	Lipids	Free fatty acids	112543-32-5	2	102500	89238	104750	9	9	9	1.29342	9.10661e-05	-13.4227	down
Hmqp005455	C18H32O3	15(R)-Hydroxylinoleic Acid*	Lipids	Free fatty acids	177931-23-6	2	94374	94428	107800	9	9	9	1.29346	9.10311e-05	-13.4233	down
Rfmb091	C18H32O3	9S-Hydroxy-10E,12Z-octadecadienoic acid*	Lipids	Free fatty acids	15514-85-9	1	236920	240850	248520	9	9	9	1.29357	3.71752e-05	-14.7153	down
MA10012327	C18H37NO2	D-Sphingosine	Lipids	Sphingolipids	123-78-4	3	3172.7	4264.2	3387.7	9	9	9	1.29322	0.00249432	-8.64714	down
MWS4295	C18H36O3	DL-2-hydroxystearic acid	Lipids	Free fatty acids	629-22-1	2	44265	37935	41527	9	9	9	1.29346	0.000218222	-12.1619	down
MWS5235	C18H36O3	12-Hydroxyoctadecanoic acid	Lipids	Free fatty acids	106-14-9	2	89622	80805	84495	9	9	9	1.29353	0.000105915	-13.2048	down
MWSmce549	C17H34O4	1-Monomyristin	Lipids	Free fatty acids	589-68-4	3	297400	259200	266830	9	9	9	1.29353	3.27897e-05	-14.8964	down
Zmyn004449	C18H30O4	9-Hydroxy-12-oxo-10(E),15(Z)-octadecadienoic acid	Lipids	Free fatty acids	-	2	8346.1	9493.3	7712.1	9	9	9	1.29355	0.00105669	-9.88623	down
pmb2789	C18H30O4	13S-Hydroperoxy-6Z,9Z,11E-octadecatrienoic acid	Lipids	Free fatty acids	121107-97-9	3	116990	97889	125310	9	9	9	1.29329	7.93676e-05	-13.6211	down
Zmzn003953	C18H30O4	13(s)-hydroperoxy-(9z,11e,15z)-octadecatrienoic acid	Lipids	Free fatty acids	67597-26-6	1	3534900	3614500	3395000	9	9	9	1.29361	2.5606e-06	-18.5751	down
Hmqp006221	C19H34O3	13-Hydroxy-9Z,11E-octadecadienoic acid	Lipids	Free fatty acids	18104-45-5	3	6878.9	5950.2	5866.1	9	9	9	1.29344	0.00144422	-9.43549	down
Lmbn005287	C18H32O4	7S,8S-DiHODE; (9Z,12Z)-(7S,8S)-Dihydroxyoctadeca-9,12-dienoic acid	Lipids	Free fatty acids	143288-65-7	3	6151.8	5208	5929.8	9	9	9	1.29332	0.00156163	-9.32273	down
Zmjn004133	C18H32O4	9S-Hydroperoxy-10E,12Z-octadecadienoic acid	Lipids	Free fatty acids	5502-91-0	3	839220	634660	737470	9	9	9	1.29338	1.22097e-05	-16.3216	down
pmb2804	C18H32O4	13S-Hydroperoxy-9Z,11E-octadecadienoic acid	Lipids	Free fatty acids	33964-75-9	3	3618800	3470600	3472700	9	9	9	1.29358	2.55631e-06	-18.5775	down
MWSmce539	C18H34O4	Dibutyl sebacate	Lipids	Free fatty acids	109-43-3	3	4179	5995.2	4948.4	9	9	9	1.29306	0.00178541	-9.12953	down
Lmbn007891	C18H34O4	Hydroxy ricinoleic acid	Lipids	Free fatty acids	-	2	11924	3327.2	13728	9	9	9	1.28128	0.000931703	-10.0678	down
pmb2221	C18H39NO3	4-Hydroxysphinganine	Lipids	Sphingolipids	554-62-1	1	62033	60056	47733	9	9	9	1.29349	0.00015899	-12.6188	down
Hmqp006023	C20H36O3	Ethyl 9-Hydroxy-10,12-octadecadienoic acid	Lipids	Free fatty acids	-	3	6434.4	6341	7691.5	9	9	9	1.29321	0.0013192	-9.56612	down
Hmqn003054	C18H34O5	9,10,11-Trihydroxy-12-octadecenoic acid*	Lipids	Free fatty acids	61911-67-9	1	50219	42786	50780	9	9	9	1.29337	0.00018778	-12.3787	down
mws0930	C22H34O2	Docosapentaenoic acid	Lipids	Free fatty acids	24880-45-3	3	1606.9	2043.1	2255.7	9	9	9	1.2926	0.00457185	-7.773	down
MWS20033	C20H30O4	20-Carboxyarachidonic Acid	Lipids	Free fatty acids	79551-84-1	3	32270	31815	37014	9	9	9	1.2934	0.000267065	-11.8705	down
mws0949	C20H34O4	8,9-Dihydroxy-5Z,11Z,14Z-eicosatrienoic acid	Lipids	Free fatty acids	192461-96-4	3	3246.9	3970.5	3380.8	9	9	9	1.29346	0.0025476	-8.61664	down
Lmhp008885	C20H42NO7P	LysoPE 15:0(2n isomer)	Lipids	LPE	-	1	463000	505350	500840	9	9	9	1.29358	1.83775e-05	-15.7317	down
Lmhp008763	C21H42NO7P	LysoPE 16:1(2n isomer)	Lipids	LPE	-	1	1648500	1660800	1770000	9	9	9	1.29355	5.31569e-06	-17.5213	down
pmd0160	C21H44NO7P	LysoPE 16:0(2n isomer)	Lipids	LPE	-	1	574450	581970	571980	9	9	9	1.2936	1.56214e-05	-15.9661	down
pmb0874	C23H44NO7P	LysoPE 18:2(2n isomer)	Lipids	LPE	-	1	345350	330010	359170	9	9	9	1.29353	2.60988e-05	-15.2257	down
pmb0856	C23H46NO7P	LysoPE 18:1(2n isomer)	Lipids	LPE	-	1	628330	622300	630410	9	9	9	1.29358	1.43538e-05	-16.0882	down
Lmhp009129	C23H48NO7P	LysoPC 15:0(2n isomer)	Lipids	LPC	-	3	28996	33217	37829	9	9	9	1.29328	0.000269887	-11.8554	down
pmb0880	C23H48NO7P	LysoPE 18:0(2n isomer)	Lipids	LPE	-	3	14852	14708	14839	9	9	9	1.29358	0.000608122	-10.6834	down
Lmhp009349	C25H44NO7P	LysoPE 20:4(2n isomer)	Lipids	LPE	-	2	48856	51051	54070	9	9	9	1.29353	0.000175351	-12.4775	down
Lmhp010515	C25H52NO7P	LysoPC 17:0(2n isomer)	Lipids	LPC	-	1	190760	187510	210970	9	9	9	1.29349	4.58217e-05	-14.4136	down
Lmhp009682	C30H52NO7P	LysoPC 22:5(2n isomer)	Lipids	LPC	-	3	46098	44063	49054	9	9	9	1.29349	0.000193945	-12.3321	down
pmp001276	C33H56O14	1-Linolenoyl-rac-glycerol-diglucoside	Lipids	Free fatty acids	-	1	114270	101230	102160	9	9	9	1.29354	8.49965e-05	-13.5222	down
Lmhp009190	C33H58O14	2-Linoleoylglycerol-1,3-di-O-glucoside	Lipids	Glycerol ester	-	3	6484.2	7780.3	6958.9	9	9	9	1.29352	0.00127218	-9.61848	down
pmp001271	C33H58O14	1-Linoleoyl-sn-glycerol-diglucoside	Lipids	Free fatty acids	-	3	6580.1	8590.7	7844.5	9	9	9	1.29332	0.00117313	-9.73542	down
pme3967	C12H17N5O5	2-(Dimethylamino)guanosine	Nucleotides and derivatives	Nucleotides and derivatives	2140-67-2	1	20352	20136	30456	693040	732440	728160	1.29008	30.3569	4.92395	up
pme3961	C10H13N5O3	2'-Deoxyadenosine	Nucleotides and derivatives	Nucleotides and derivatives	958-09-8	3	139320	140020	137820	1158300	1317700	1244400	1.29271	8.9184	3.15679	up
pme3732	C9H13N3O5	Cytidine	Nucleotides and derivatives	Nucleotides and derivatives	65-46-3	1	26945	21500	18701	1494000	1551900	1694600	1.29168	70.5999	6.14159	up
pme3337	C14H17N5O8	Succinyladenosine	Nucleotides and derivatives	Nucleotides and derivatives	4542-23-8	1	16609	19858	13296	388780	413090	418350	1.28945	24.5206	4.61592	up
pme1474	C11H15N5O3S	5'-Deoxy-5'-(methylthio)adenosine	Nucleotides and derivatives	Nucleotides and derivatives	2457-80-9	1	176670	177880	174260	8229300	8227200	8697600	1.29353	47.5674	5.5719	up
pme1194	C9H13N3O4	2'-Deoxycytidine	Nucleotides and derivatives	Nucleotides and derivatives	951-77-9	1	32591	42191	40462	110890	134750	102280	1.26579	3.01899	1.59406	up
pme1184	C10H13N5O4	2'-Deoxyguanosine	Nucleotides and derivatives	Nucleotides and derivatives	961-07-9	1	71622	68510	70742	739440	779710	723430	1.29327	10.6347	3.41071	up
pme1178	C10H13N5O5	Guanosine	Nucleotides and derivatives	Nucleotides and derivatives	118-00-3	3	33542	40287	41688	7349700	7447400	7863700	1.29318	196.169	7.61595	up
pme1109	C5H5N5O	Guanine	Nucleotides and derivatives	Nucleotides and derivatives	73-40-5	1	185520	175260	223240	2791800	2917400	2890800	1.29209	14.7255	3.88025	up
pme0256	C5H4N4O2	Xanthine	Nucleotides and derivatives	Nucleotides and derivatives	69-89-6	3	55396	91397	71903	325310	274530	188000	1.22301	3.60244	1.84898	up
pme0230	C10H13N5O4	Adenosine	Nucleotides and derivatives	Nucleotides and derivatives	58-61-7	1	524920	544850	623030	1998300	1884400	1972000	1.28921	3.45859	1.79018	up
pme0040	C5H5N5	Adenine	Nucleotides and derivatives	Nucleotides and derivatives	73-24-5	1	149810	145150	174320	2128800	2431900	2350000	1.2922	14.7262	3.88031	up
pme0033	C5H4N4O	Hypoxanthine	Nucleotides and derivatives	Nucleotides and derivatives	68-94-0	3	17210	18474	31119	276560	281130	285870	1.28118	12.6276	3.65851	up
pmc0274	C6H6N4S	6-Methylmercaptopurine	Nucleotides and derivatives	Nucleotides and derivatives	50-66-8	1	89369	78146	100410	7683800	7848800	8183000	1.29319	88.5158	6.46786	up
pmc0066	C10H13N4O7P	2'-Deoxyinosine-5'-monophosphate	Nucleotides and derivatives	Nucleotides and derivatives	3393-18-8	1	85396	59215	62496	6355700	6158800	6410500	1.29203	91.3779	6.51377	up
mws0255	C4H5N3O	Cytosine	Nucleotides and derivatives	Nucleotides and derivatives	71-30-7	1	18578	15480	17975	316790	315680	357840	1.29253	19.0323	4.25038	up
ML10180524	C9H13N3O5	Cytarabine	Nucleotides and derivatives	Nucleotides and derivatives	147-94-4	1	45775	42751	48478	383940	335770	286980	1.28829	7.34789	2.87733	up
pme0257	C4H4N2O2	Uracil	Nucleotides and derivatives	Nucleotides and derivatives	66-22-8	1	392220	391800	478360	411560	445190	387440	0.0924012	0.985591	-0.0209394	insig
mws0981	C6H5N5O2	Isoxanthopterin	Nucleotides and derivatives	Nucleotides and derivatives	529-69-1	A	27706	9	9	9	25367	22743	0.420824	1.73564	0.795471	insig
mws0863	C5H11O7P	2-Deoxyribose-5'-phosphate	Nucleotides and derivatives	Nucleotides and derivatives	102916-66-5	B	186580	9	9	9	426880	356050	0.471266	4.19586	2.06897	insig
pmb2507	C5H11O7P	2-Deoxyribose-1-phosphate	Nucleotides and derivatives	Nucleotides and derivatives	17210-42-3	B	148280	9	9	9	148910	161560	0.433916	2.09362	1.066	insig
pme0264	C10H14N2O5	Thymidine	Nucleotides and derivatives	Nucleotides and derivatives	50-89-5	B	280340	9	9	9	292910	301250	0.434453	2.11932	1.0836	insig
mws0248	C9H12N2O6	Uridine	Nucleotides and derivatives	Nucleotides and derivatives	58-96-8	A	428690	9	9	9	947760	858660	0.468719	4.21366	2.07507	insig
mws0976	C9H12N2O6	β-Pseudouridine	Nucleotides and derivatives	Nucleotides and derivatives	1445-07-4	B	41923	9	9	9	102200	90911	0.48345	4.60456	2.20306	insig
pme1187	C10H14N2O6	5-Methyluridine	Nucleotides and derivatives	Nucleotides and derivatives	1463-10-1	B	4212.5	9	9	9	6427.3	7296.6	0.473833	3.24616	1.69874	insig
mws1060	C10H12N4O5	9-(Arabinosyl)hypoxanthine	Nucleotides and derivatives	Nucleotides and derivatives	7013-16-3	A	1798900	9	9	9	1829200	1808500	0.431761	2.02216	1.0159	insig
pme3350	C10H13N5O5	8-Hydroxy-2-deoxyguanosine	Nucleotides and derivatives	Nucleotides and derivatives	88847-89-6	B	5479	9	9	9	4557.3	4887.3	0.417619	1.71977	0.782219	insig
mws0668	C10H12N4O6	Xanthosine	Nucleotides and derivatives	Nucleotides and derivatives	146-80-5	A	464230	9	9	9	451080	454100	0.429898	1.9498	0.963323	insig
mws0724	C10H13N5O6	8-Hydroxyguanosine	Nucleotides and derivatives	Nucleotides and derivatives	3868-31-3	B	28364	9	9	9	31281	33932	0.441011	2.29801	1.20038	insig
pme3174	C9H14N3O8P	Cytidine 5'-monophosphate(Cytidylic acid)	Nucleotides and derivatives	Nucleotides and derivatives	63-37-6	B	198870	9	9	9	187690	229830	0.433753	2.09932	1.06992	insig
pme3188	C9H13N2O9P	Uridine 5'-monophosphate	Nucleotides and derivatives	Nucleotides and derivatives	58-97-9	A	442590	9	9	9	573080	533610	0.442874	2.5004	1.32216	insig
mws0884	C10H12N5O6P	Cyclic 3',5'-Adenylic acid	Nucleotides and derivatives	Nucleotides and derivatives	60-92-4	A	70552	9	9	9	58947	55872	0.417731	1.62715	0.702348	insig
pme3184	C10H14N5O6P	2'-Deoxyadenosine-5'-monophosphate	Nucleotides and derivatives	Nucleotides and derivatives	653-63-4	B	33630	9	9	9	32585	33614	0.430132	1.96767	0.976485	insig
mws0675	C11H15N2O8P	β-Nicotinamide mononucleotide	Nucleotides and derivatives	Nucleotides and derivatives	1094-61-7	B	207670	9	9	9	184920	198150	0.426566	1.84449	0.883224	insig
mws0609	C10H12N5O7P	Guanosine 3',5'-cyclic monophosphate	Nucleotides and derivatives	Nucleotides and derivatives	7665-99-8	A	430030	9	9	9	426320	427340	0.430847	1.98506	0.989179	insig
mws0874	C10H14N5O7P	3'-Adenylic Acid	Nucleotides and derivatives	Nucleotides and derivatives	84-21-9	B	16405	9	9	9	14019	12722	0.415083	1.62881	0.703821	insig
pmb0981	C10H14N5O7P	Adenosine 5'-monophosphate	Nucleotides and derivatives	Nucleotides and derivatives	61-19-8	A	1289400	9	9	9	1342600	1328900	0.432948	2.07187	1.05093	insig
pmb0998	C10H14N5O8P	Guanosine 5'-monophosphate	Nucleotides and derivatives	Nucleotides and derivatives	85-32-5	B	184770	9	9	9	129370	117790	0.407057	1.33758	0.419627	insig
pmb0964	C16H23N5O5	Isopentenyladenine-7-N-glucoside	Nucleotides and derivatives	Nucleotides and derivatives	-	B	116150	9	9	9	111720	103750	0.426581	1.85489	0.891335	insig
pme3007	C9H14N2O12P2	Uridine 5'-diphosphate	Nucleotides and derivatives	Nucleotides and derivatives	27821-45-0	A	9253.7	9	9	9	11354	11041	0.446674	2.41639	1.27285	insig
pme2117	C10H15N5O10P2	Adenosine 5'-diphosphate	Nucleotides and derivatives	Nucleotides and derivatives	58-64-0	A	64761	9	9	9	83910	90832	0.450062	2.69765	1.4317	insig
Zmfn000481	C14H22N2O16P2	Uridine-5'-Diphosphate-D-Xylose	Nucleotides and derivatives	Nucleotides and derivatives	626915	A	1104200	9	9	9	963170	1065300	0.427004	1.83703	0.877373	insig
pmb2922	C15H24N2O17P2	Uridine 5'-diphospho-D-glucose	Nucleotides and derivatives	Nucleotides and derivatives	133-89-1	A	5963500	9	9	9	6105600	5986200	0.431827	2.02763	1.01979	insig
pmb0530	C21H27N7O14P2	Nicotinic acid adenine dinucleotide	Nucleotides and derivatives	Nucleotides and derivatives	53-84-9	B	36698	9	9	9	36862	41997	0.436051	2.14806	1.10303	insig
pme3968	C6H7N5O	7-Methylguanine	Nucleotides and derivatives	Nucleotides and derivatives	578-76-7	3	65089	58615	81721	30602	25545	32167	1.24063	0.429909	-1.2179	down
pme0166	C6H6N4O2	1-Methylxanthine	Nucleotides and derivatives	Nucleotides and derivatives	6136-37-4	3	30304	22852	27263	9104.7	9524.7	9404.7	1.27659	0.3486	-1.52035	down
mws0251	C5H6N2O2	Thymine	Nucleotides and derivatives	Nucleotides and derivatives	65-71-4	3	95485	121310	118760	35133	30832	39128	1.27331	0.313192	-1.67488	down
pme3200	C2H7N3	1-methylguanidine	Nucleotides and derivatives	Nucleotides and derivatives	471-29-4	3	47150	41400	38325	9	9	9	1.2935	0.000212808	-12.1982	down
pme0151	C4H6N2O2	5,6-Dihydrouracil	Nucleotides and derivatives	Nucleotides and derivatives	504-07-4	3	18290	16309	22843	9	9	9	1.29292	0.000470039	-11.0549	down
mws0572	C5H7N3O	5-Methylcytosine	Nucleotides and derivatives	Nucleotides and derivatives	554-01-8	3	9518.6	7887	7155.4	9	9	9	1.29326	0.0010993	-9.82919	down
pme0152	C5H8N2O2	5,6-Dihydro-5-methyluracil	Nucleotides and derivatives	Nucleotides and derivatives	696-04-8	3	76005	80252	86643	9	9	9	1.2935	0.000111157	-13.1351	down
mws0847	C6H7N5	1-Methyladenine	Nucleotides and derivatives	Nucleotides and derivatives	5142-22-3	1	48504	47853	64031	9	9	9	1.29311	0.000168342	-12.5363	down
pme0183	C5H5N5O	Isoguanine	Nucleotides and derivatives	Nucleotides and derivatives	3373-53-3	3	55856	27595	51132	9	9	9	1.29142	0.00020062	-12.2832	down
MWS4525	C6H7N5O	6-O-methylguanine	Nucleotides and derivatives	Nucleotides and derivatives	20535-83-5	2	97685	70553	82229	9	9	9	1.29322	0.000107799	-13.1794	down
pme1119	C10H12N4O5	Inosine	Nucleotides and derivatives	Nucleotides and derivatives	58-63-9	3	21794	16373	22144	9	9	9	1.29296	0.00044768	-11.1252	down
Hmhp001812	C11H15N5O4	2'-O-Methyladenosine	Nucleotides and derivatives	Nucleotides and derivatives	2140-79-6	1	16658	11510	8308.6	9	9	9	1.29178	0.000740201	-10.3998	down
MWS4354	C11H15N5O4	N6-methyladenosine	Nucleotides and derivatives	Nucleotides and derivatives	1867-73-8	3	90452	74302	86089	9	9	9	1.29339	0.000107637	-13.1815	down
MWSmce333	C10H13N5O5	Crotonoside; 2-Hydroxyadenosine	Nucleotides and derivatives	Nucleotides and derivatives	1818-71-9	3	19059	11424	19876	9	9	9	1.29173	0.00053615	-10.8651	down
Lmcp002302	C12H17N5O5	N6-(2-Hydroxyethyl)adenosine	Nucleotides and derivatives	Nucleotides and derivatives	4338-48-1	3	22383	18023	11922	9	9	9	1.29231	0.000515976	-10.9204	down
pmc0281	C15H21N5O8	Ribosyladenosine	Nucleotides and derivatives	Nucleotides and derivatives	-	3	25116	28910	27045	9	9	9	1.29357	0.000333041	-11.552	down
Rfmb319	C6H11NO2	Pipecolic acid	Organic acids	Organic acids	4043-87-2	1	420720	439090	435230	2199300	2081400	2138000	1.29317	4.95637	2.30928	up
pme3207	C6H6O4	Muconic acid	Organic acids	Organic acids	1119-72-8	1	8442600	7876700	8302300	20428000	20809000	20067000	1.29211	2.48985	1.31606	up
pme2380	C5H6O5	α-Ketoglutaric acid	Organic acids	Organic acids	328-50-7	3	80091	81756	86461	461160	478690	484800	1.29313	5.73743	2.5204	up
pme0274	C6H13NO2	6-Aminocaproic acid	Organic acids	Organic acids	60-32-2	3	169730	163080	168040	505140	1883800	1989300	1.18072	8.74162	3.1279	up
pme0243	C5H8O4	Glutaric acid*	Organic acids	Organic acids	110-94-1	1	207470	217100	231910	858200	861860	902540	1.29215	3.99494	1.99817	up
mws0924	C6H10O4	2-Methylglutaric acid*	Organic acids	Organic acids	617-62-9	1	491140	540670	443200	1652000	1654300	1832800	1.2856	3.48411	1.80079	up
mws0576	C4H8O3	3-Hydroxybutyric acid*	Organic acids	Organic acids	300-85-6	3	264930	259460	376910	8543200	8267200	8057000	1.29068	27.5906	4.7861	up
mws0275	C4H6O5	L-Malic acid	Organic acids	Organic acids	97-67-6	2	236740	181110	212420	7879500	9028100	10036000	1.29188	42.7493	5.41783	up
mws0242	C8H14O4	Suberic Acid	Organic acids	Organic acids	505-48-6	1	238100	255560	188880	659300	695100	655060	1.27342	2.94409	1.55782	up
mws0236	C2H7NO3S	2-Aminoethanesulfonic acid	Organic acids	Organic acids	107-35-7	3	110360	114070	150460	383320	306730	370010	1.26246	2.82766	1.49961	up
Lmmn003323	C16H32O3	2-Hydroxyhexadecanoic acid	Organic acids	Organic acids	764-67-0	1	870480	834830	851160	1764900	1693200	1735900	1.29234	2.03171	1.02269	up
Rfmb320	C7H13NO2	1-Methylpiperidine-2-carboxylic acid	Organic acids	Organic acids	7730-87-2	3	2073400	2125500	1803700	2135800	2157400	2039900	0.586869	1.05506	0.0773243	insig
pme3017	C4H9NO2	2-Aminoisobutyric acid*	Organic acids	Organic acids	62-57-7	3	2242000	1792500	2212400	2605300	2728400	2631500	1.11508	1.27506	0.35057	insig
pme1975	C3H4O4	Malonic acid*	Organic acids	Organic acids	141-82-2	3	580240	250930	358710	677130	691700	648980	0.99798	1.69581	0.761974	insig
pme0275	C5H8O3	4-Oxopentanoic Acid	Organic acids	Organic acids	123-76-2	3	85555	74515	78037	48833	46480	49492	1.27206	0.608151	-0.717499	insig
mws0972	C6H12O3	6-Hydroxyhexanoic acid	Organic acids	Organic acids	1191-25-9	1	164720	174720	182720	127420	118100	117260	1.2627	0.694768	-0.525397	insig
mws0823	C5H8O3	3-Methyl-2-Oxobutanoic acid	Organic acids	Organic acids	759-05-7	3	570890	562490	554910	299720	287910	316390	1.28796	0.535465	-0.901136	insig
mws0237	C9H16O4	Azelaic acid	Organic acids	Organic acids	123-99-9	1	6765700	6819500	6911500	11758000	11868000	11755000	1.29324	1.72618	0.787583	insig
mws0159	C9H8O3	Phenylpyruvic acid	Organic acids	Organic acids	156-06-9	2	76454	85173	128470	89451	72965	70924	0.632224	0.804352	-0.314102	insig
Lmgn002184	C7H10O5	2-Oxoheptanedionic acid	Organic acids	Organic acids	17126-90-8	3	77596	83580	89452	97988	107320	108260	1.1754	1.25113	0.323231	insig
Lmgn002091	C7H10O5	2-Methyl-3-oxoadipic acid	Organic acids	Organic acids	-	3	84010	72797	81655	97802	109140	97176	1.17004	1.27533	0.350872	insig
pme1974	C3H4O3	Pyruvic acid	Organic acids	Organic acids	127-17-3	B	98286	9	9	9	104150	92345	0.431064	1.99894	0.999237	insig
Lmqp000873	C4H4O3	Succinic anhydride	Organic acids	Organic acids	108-30-5	B	235180	9	9	9	243790	236090	0.43236	2.04036	1.02882	insig
Lmgn000219	C4H6O3	Succinic semialdehyde	Organic acids	Organic acids	692-29-5	B	8376.8	9	9	9	10465	11384	0.452819	2.60375	1.38059	insig
mws0206	C4H8O3	2-Hydroxybutyric Acid	Organic acids	Organic acids	3347-90-8	B	61829	9	9	9	71772	58626	0.434256	2.10854	1.07625	insig
mws0177	C5H4O3	2-Furanoic acid	Organic acids	Organic acids	88-14-2	B	125680	9	9	9	109420	121650	0.426072	1.83837	0.878424	insig
pme2935	C5H8O3	2-Oxovaleric acid	Organic acids	Organic acids	1821-02-9	B	8302.5	9	9	9	7208.7	9441.3	0.430697	2.00216	1.00156	insig
mws0192	C4H6O4	Succinic acid*	Organic acids	Organic acids	110-15-6	A	11327000	9	9	9	10968000	10897000	0.42979	1.93034	0.948856	insig
mws0470	C4H6O4	Methylmalonic acid*	Organic acids	Organic acids	516-05-2	A	14594000	9	9	9	13121000	13273000	0.427178	1.80855	0.854833	insig
pme3096	C3H5NO4	Aminomalonic acid	Organic acids	Organic acids	1068-84-4	A	483890	9	9	9	461140	478080	0.42966	1.94092	0.956744	insig
mws0425	C5H6O4	Citraconic acid	Organic acids	Organic acids	498-23-7	B	208300	9	9	9	208330	181400	0.427223	1.87088	0.903721	insig
Zmpn000638	C4H9N3O2	3-Guanidinopropionic acid	Organic acids	Organic acids	353-09-3	B	22964	9	9	9	21411	26932	0.434517	2.10391	1.07307	insig
Lmbn001364	C5H8O4	4-Hydroxy-2-Oxopentanoic Acid	Organic acids	Organic acids	3318-73-8	B	55617	9	9	9	57232	58335	0.433755	2.0774	1.05478	insig
Lmgn000160	C4H8N2O3	3-Ureidopropionic Acid	Organic acids	Organic acids	462-88-4	B	15914	9	9	9	16549	11609	0.420175	1.76795	0.822079	insig
Lmrn002746	C6H12O3	2-Hydroxy-4-methylpentanoic acid	Organic acids	Organic acids	498-36-2	B	27609	9	9	9	19410	18700	0.403619	1.37977	0.464431	insig
Zmgn000503	C5H10O4	2,3-Dihydroxy-3-Methylbutanoic Acid	Organic acids	Organic acids	1756-18-9	A	196410	9	9	9	216370	201450	0.434719	2.12714	1.08891	insig
Lmbn002862	C7H6O3	3-Hydroxybenzoic Acid	Organic acids	Organic acids	36320	A	4210300	9	9	9	4246700	4247400	0.431627	2.01745	1.01253	insig
Lmgn000224	C5H6O5	(S)-2-methyl-3-oxosuccinic acid	Organic acids	Organic acids	-	B	12817	9	9	9	31469	22159	0.483695	4.17896	2.06315	insig
Lmbn001609	C6H10O4	(S)-2-Acetyl-2-Hydroxybutanoic Acid	Organic acids	Organic acids	-	A	438260	9	9	9	387850	395350	0.425199	1.78701	0.837551	insig
Wmzn000227	C6H10O4	2,2-Dimethylsuccinic acid	Organic acids	Organic acids	597-43-3	B	56477	9	9	9	54588	65507	0.435003	2.12592	1.08809	insig
pmb2826	C5H8O5	L-Citramalic acid	Organic acids	Organic acids	1583941	A	52704	9	9	9	62228	73958	0.447596	2.58327	1.3692	insig
Zmyn000247	C5H8O5	(S)-2-Hydroxyglutaric Acid	Organic acids	Organic acids	13095-48-2	B	71142	9	9	9	71228	58404	0.424816	1.82182	0.865384	insig
pme3154	C6H12O4	Mevalonic acid	Organic acids	Organic acids	150-97-0	B	88357	9	9	9	95651	86620	0.433064	2.06257	1.04445	insig
mws0262	C4H6O6	L-Tartaric acid	Organic acids	Organic acids	87-69-4	B	44675	9	9	9	35083	49762	0.426678	1.8986	0.924934	insig
mws0489	C8H6O3	Benzoylformic acid	Organic acids	Organic acids	611-73-4	B	28234	9	9	9	28593	25979	0.428674	1.93193	0.950046	insig
mws0639	C7H6O4	2,3-Dihydroxybenzoic Acid*	Organic acids	Organic acids	303-38-8	A	2766400	9	9	9	2693300	2545200	0.428718	1.89361	0.921137	insig
Lmbn001467	C7H13NO3	5-Acetamidopentanoic Acid	Organic acids	Organic acids	1072-10-2	B	3623.9	9	9	9	4610	3025.2	0.433581	2.09896	1.06967	insig
Lmbn002072	C7H12O4	2-Propylsuccinic acid*	Organic acids	Organic acids	618-57-5	A	132150	9	9	9	124340	122530	0.427127	1.86792	0.901431	insig
Zmjn001813	C7H12O4	Pimelic acid*	Organic acids	Organic acids	111-16-0	B	70589	9	9	9	96039	70678	0.440842	2.36132	1.2396	insig
pme2761	C5H6O6	4-Hydroxy-2-oxoglutaric acid	Organic acids	Organic acids	1187-99-1	B	204680	9	9	9	206120	215430	0.432918	2.05942	1.04224	insig
pme0282	C8H6O4	Phthalic acid	Organic acids	Organic acids	88-99-3	A	175560	9	9	9	171610	164830	0.428727	1.91624	0.938276	insig
mws2125	C3H5O6P	Phosphoenolpyruvate	Organic acids	Organic acids	138-08-9	B	228110	9	9	9	228560	187750	0.425661	1.82494	0.867846	insig
pme3186	C3H7O6P	DL-Glyceraldehyde-3-phosphate	Organic acids	Organic acids	591-59-3	B	126950	9	9	9	60080	44886	0.372911	0.826783	-0.274419	insig
Xmbp001692	C7H6O5	2,4,6-Trihydroxybenzoic acid	Organic acids	Organic acids	83-30-7	A	1817900	9	9	9	1832900	1878100	0.432208	2.04135	1.02952	insig
ML10176345	C7H8O5	3-Dehydroshikimic acid	Organic acids	Organic acids	2922-42-1	B	104820	9	9	9	92801	89705	0.42261	1.74092	0.799853	insig
pme3009	C6H6O6	Trans-Citridic acid	Organic acids	Organic acids	4023-65-8	A	5547500	9	9	9	6828600	6475700	0.43896	2.39825	1.26198	insig
mws0154	C7H10O5	Shikimic acid	Organic acids	Organic acids	138-59-0	A	213330	9	9	9	232820	162790	0.425803	1.85434	0.890903	insig
Zmgn001448	C7H12O5	2-Propylmalic Acid	Organic acids	Organic acids	-	A	264230	9	9	9	207630	197520	0.416041	1.53325	0.616596	insig
pmb3101	C7H12O5	2-Isopropylmalic Acid	Organic acids	Organic acids	49601-06-1	A	437420	9	9	9	379720	371170	0.423001	1.71658	0.77954	insig
pme2732	C12H10O2	1-Naphthylacetic acid	Organic acids	Organic acids	86-87-3	B	16453	9	9	9	18129	15189	0.431798	2.02337	1.01676	insig
mws0281	C6H8O7	Citric Acid	Organic acids	Organic acids	77-92-9	A	9059500	9	9	9	9612500	10038000	0.4346	2.16905	1.11706	insig
Zmyn000453	C6H8O7	Isocitric Acid	Organic acids	Organic acids	320-77-4	A	11525000	9	9	9	10774000	11491000	0.429815	1.93188	0.950009	insig
mws0277	C7H12O6	Quinic Acid	Organic acids	Organic acids	77-95-2	A	21750000	9	9	9	23691000	21180000	0.432372	2.06303	1.04477	insig
pme2710	C12H20O3	Dihydrojasmonic acid	Organic acids	Organic acids	3572-64-3	B	65894	9	9	9	64618	66464	0.430899	1.98888	0.991956	insig
pme0220	C13H20O3	Methyl jasmonate	Organic acids	Organic acids	1211-29-6	B	44064	9	9	9	43351	42484	0.429447	1.94737	0.961528	insig
Lmtn004049	C15H20O4	Abscisic acid	Organic acids	Organic acids	21293-29-8	B	13703	9	9	9	13916	11703	0.425515	1.86779	0.901335	insig
pmb2657	C10H18N4O6	Argininosuccinic acid	Organic acids	Organic acids	2387-71-5	B	50862	9	9	9	51919	54310	0.434111	2.08801	1.06213	insig
pme2074	C18H29NO4	(-)-Jasmonoyl-L-Isoleucine	Organic acids	Organic acids	120330-93-0	B	15848	9	9	9	11936	14146	0.415651	1.64446	0.717614	insig
Zmyn002323	C8H8O3	2-Hydroxyphenylacetic acid	Organic acids	Organic acids	614-75-5	2	447250	429410	444620	57575	44023	42430	1.28863	0.109006	-3.19752	down
Zmgn004439	C10H20O2	Decanoic acid	Organic acids	Organic acids	334-48-5	2	49181	52479	52285	18262	19623	18245	1.29122	0.364611	-1.45557	down
pme3011	C4H9NO2	γ-Aminobutyric acid*	Organic acids	Organic acids	20791	3	5041600	4784100	4366600	1571100	1609500	1608400	1.29002	0.337436	-1.56731	down
pme2601	C3H6O3	3-Hydroxypropanoic acid	Organic acids	Organic acids	503-66-2	3	65013	82926	81486	23550	18178	10619	1.23127	0.228166	-2.13184	down
pme1216	C6H5NO2	2-Picolinic acid	Organic acids	Organic acids	98-98-6	3	1577900	1753400	1468100	171860	156400	149620	1.29194	0.0995708	-3.32813	down
pme0295	C6H11NO3	4-Acetamidobutyric acid	Organic acids	Organic acids	3025-96-5	3	1150000	1156100	1033600	486460	469810	475430	1.28907	0.428691	-1.22199	down
pme0266	C10H18O4	Sebacate	Organic acids	Organic acids	111-20-6	1	52569	57813	51244	10199	7665.4	9020.7	1.2872	0.166341	-2.58778	down
pme0120	C5H11NO2	5-Aminovaleric acid	Organic acids	Organic acids	660-88-8	1	10816000	11943000	10927000	28720	30322	31093	1.29355	0.00267574	-8.54585	down
mws1167	C4H4O5	Oxaloacetic acid	Organic acids	Organic acids	328-42-7	3	43621	36753	48448	17946	22763	20132	1.24335	0.472287	-1.08226	down
mws0601	C5H5NO2	Pyrrole-2-carboxylic acid	Organic acids	Organic acids	634-97-9	3	459610	454730	465500	107690	118730	112580	1.2925	0.245681	-2.02514	down
mws0567	C5H11N3O2	4-Guanidinobutyric acid	Organic acids	Organic acids	463-00-3	3	783370	1150900	1037200	458260	472580	491460	1.23201	0.478652	-1.06295	down
mws0147	C5H10O3	β-Hydroxyisovaleric acid	Organic acids	Organic acids	625-08-1	1	1671700	1661600	1802200	490830	489850	514190	1.29157	0.291086	-1.78048	down
Lmbn003524	C9H16O3	9-Oxononanoic acid	Organic acids	Organic acids	2553-17-5	3	275400	270430	266800	49696	58465	61048	1.28941	0.208224	-2.26379	down
pmf0096	C2H2O4	Oxalic acid	Organic acids	Organic acids	144-62-7	3	39228	38928	33212	9	9	9	1.29358	0.000242439	-12.0101	down
MWS2040	CH4O3S	Methanesulfonic acid	Organic acids	Organic acids	75-75-2	3	957040	941040	796860	9	9	9	1.2936	1.00188e-05	-16.6069	down
mws4052	C4H7NO2	1-Aminocyclopropane-1-carboxylic acid	Organic acids	Organic acids	22059-21-8	3	50028	33639	28714	9	9	9	1.29265	0.000240254	-12.0232	down
pme1730	C4H6O4	D-Erythronolactone	Organic acids	Organic acids	15667-21-7	3	329070	329550	326150	9	9	9	1.29359	2.74176e-05	-15.1545	down
MWSmce448	C5H6N2O2	Imidazol-1-yl-acetic acid*	Organic acids	Organic acids	22884-10-2	3	191670	118040	176670	9	9	9	1.29276	5.55122e-05	-14.1368	down
MWSmce118	C5H6N2O2	Imidazole-4-Acetic Acid*	Organic acids	Organic acids	645-65-8	3	212510	194710	217880	9	9	9	1.2935	4.31931e-05	-14.4988	down
mws0473	C5H8O4	2-Methylsuccinic acid*	Organic acids	Organic acids	498-21-5	1	585400	599810	675780	9	9	9	1.29349	1.45084e-05	-16.0728	down
mws0341	C6H12O3	2-Hydroxyisocaproic acid	Organic acids	Organic acids	20312-37-2	1	4659800	6662400	5531800	9	9	9	1.29351	1.60199e-06	-19.2517	down
MWS2376	C7H12O3	4-Hydroxycyclohexylcarboxylic acid	Organic acids	Organic acids	3685-26-5	2	77564	54830	71387	9	9	9	1.29307	0.000132495	-12.8818	down
mws0208	C6H10O4	Adipic Acid*	Organic acids	Organic acids	124-04-9	1	570050	523640	533730	9	9	9	1.29356	1.65907e-05	-15.8793	down
pme3146	C5H10N2O3	β-Ureidoisobutyric acid	Organic acids	Organic acids	2905-86-4	2	1684200	1420600	1661900	9	9	9	1.29346	5.6643e-06	-17.4297	down
MWS4533	C9H10O2	(R)-(-)-2-Phenylpropionic Acid	Organic acids	Organic acids	7782-26-5	1	88879	77389	85154	9	9	9	1.29348	0.000107389	-13.1849	down
pmf0420	C9H10O2	Benzyl acetate	Organic acids	Organic acids	140-11-4	3	446560	472530	495470	9	9	9	1.29355	1.90872e-05	-15.677	down
MWS1962	C10H16O	cis-Citral	Organic acids	Organic acids	5392-40-5	3	170480	140760	124470	9	9	9	1.29342	6.19678e-05	-13.9781	down
MWS0980	C5H6N2O4	L-Dihydroorotic Acid	Organic acids	Organic acids	5988-19-2	3	2680.6	2482	3256.2	9	9	9	1.29283	0.00320711	-8.28451	down
Zmdp000917	C6H13N3O2	δ-Guanidinovaleric acid	Organic acids	Organic acids	462-93-1	3	15078	10780	13824	9	9	9	1.29291	0.000680409	-10.5213	down
MWS5238	C10H12O2	4-Phenylbutyric acid	Organic acids	Organic acids	1821-12-1	2	72659	71042	71593	9	9	9	1.29358	0.00012541	-12.9611	down
MWS0274	C9H10O3	DL-3-Phenyllactic acid	Organic acids	Organic acids	828-01-3	1	291810	305330	280340	9	9	9	1.29362	3.07699e-05	-14.9881	down
Hmln008318	C10H18O2	8-Methyl-6-nonenoic acid	Organic acids	Organic acids	59320-77-3	3	3407.5	3379.8	2677.8	9	9	9	1.29332	0.00285258	-8.45351	down
MWSslk038	C8H15NO3	6-Acetamidohexanoic acid	Organic acids	Organic acids	21041	3	46193	41157	43414	9	9	9	1.29351	0.000206479	-12.2417	down
pme2550	C6H6O6	Cis-Aconitic acid	Organic acids	Organic acids	585-84-2	3	21935	30545	37120	9	9	9	1.29254	0.000301339	-11.6963	down
MWSslk124	C11H12O4	2-Benzylsuccinic Acid	Organic acids	Organic acids	884-33-3	2	19663	25286	15687	9	9	9	1.29309	0.00044528	-11.133	down
pmn001684	C12H18O4	Tuberonic Acid	Organic acids	Organic acids	124649-26-9	1	77198	75391	72542	9	9	9	1.2936	0.00011993	-13.0255	down
MWSslk154	C12H20O7	Triethyl citrate	Organic acids	Organic acids	77-93-0	1	89520	103620	97124	9	9	9	1.29357	9.30188e-05	-13.3921	down
Zmyn000268	C3H6O3	2,3-Dihydroxypropanal	Others	Saccharides and Alcohols	56-82-6	3	15070	10791	22642	148960	157830	143310	1.2724	9.27984	3.2141	up
Zmpn000199	C6H10O8	D-Galactaric acid	Others	Saccharides and Alcohols	526-99-8	3	26540	13502	16154	98944	100460	125670	1.2583	5.78465	2.53223	up
Zmgn000447	C3H7O7P	3-Phospho-D-glyceric acid	Others	Saccharides and Alcohols	820-11-1	3	11941	8906	9036.8	194870	207930	264090	1.28911	22.3161	4.48001	up
pmf0367	C9H6O4	5,7-Dihydroxychromone	Others	Others	31721-94-5	3	23260	32119	34945	73680	84733	81742	1.2509	2.65882	1.41078	up
pme3705	C6H10O7	D-Glucoronic acid*	Others	Saccharides and Alcohols	1700908	3	105190	81154	108730	520130	538560	485640	1.2856	5.2337	2.38783	up
pme3313	C6H13O9P	D-Fructose 6-phosphate*	Others	Saccharides and Alcohols	643-13-0	3	28958	32459	19911	6149300	6369700	6362100	1.29123	232.16	7.85897	up
pme2237	C6H14O6	Dulcitol*	Others	Saccharides and Alcohols	608-66-2	3	52980	38413	56986	383870	359440	353180	1.28495	7.38979	2.88553	up
pme1261	C9H19NO4	D-Panthenol	Others	Saccharides and Alcohols	81-13-0	1	397470	400070	471720	1242800	1271800	1384100	1.28599	3.07163	1.61901	up
pme1014	C31H40O2	Menatetrenone (Vitamin K2)	Others	Vitamin	11032-49-8	3	903520	789720	1026400	6460000	6882500	7032900	1.29027	7.49195	2.90534	up
pme0519	C12H22O11	D-Sucrose*	Others	Saccharides and Alcohols	57-50-1	3	6711.5	13212	9499.8	588200	543530	563300	1.28721	57.6084	5.84821	up
pme0513	C5H12O5	Xylitol	Others	Saccharides and Alcohols	87-99-0	3	34135	25503	47608	92844	88697	78671	1.20077	2.42631	1.27876	up
pmb3081	C6H11PO11	Glucarate O-Phosphoric acid	Others	Saccharides and Alcohols	-	3	32685	111320	32074	12570000	9640400	10607000	1.27714	186.379	7.54209	up
pma3101	C11H14NO6+	Nicotinate D-ribonucleoside	Others	Vitamin	17720-18-2	3	64245	25477	40370	1644300	1742000	1687000	1.28117	38.9978	5.28532	up
pma0134	C4H8O4	D-(-)-Threose	Others	Saccharides and Alcohols	95-43-2	3	77743	86900	86493	2610900	2682300	2453900	1.29306	30.8482	4.94712	up
mws4170	C6H12O6	D-Glucose*	Others	Saccharides and Alcohols	14431-43-7	3	350450	354400	438450	4815700	4454200	4749200	1.29168	12.262	3.61612	up
mws1333	C12H22O11	Melibiose*	Others	Saccharides and Alcohols	585-99-9	3	12537	19419	26639	100500	78532	77253	1.23667	4.37384	2.1289	up
mws1189	C6H10O7	D-Galacturonic acid*	Others	Saccharides and Alcohols	685-73-4	3	90122	122390	102300	411100	367800	370880	1.2791	3.65228	1.8688	up
mws1155	C6H14O6	D-Mannitol*	Others	Saccharides and Alcohols	69-65-8	3	9456.2	7768.8	17970	113890	112320	112650	1.26595	9.62807	3.26725	up
mws0866	C6H13O9P	D-Glucose 6-phosphate*	Others	Saccharides and Alcohols	56-73-5	3	11203	10211	13968	12976000	12925000	12000000	1.29331	1071.19	10.065	up
mws0344	C5H10O6	D-Xylonic acid	Others	Saccharides and Alcohols	526-91-0	2	16632	12477	29604	3247500	3089300	3170700	1.28822	161.932	7.33924	up
mws0264	C12H22O11	D-Trehalose*	Others	Saccharides and Alcohols	99-20-7	3	18654	16586	18808	112830	106650	119330	1.29205	6.26869	2.64816	up
mws0232	C17H20N4O6	Riboflavin (Vitamin B2)	Others	Vitamin	83-88-5	2	41130	34840	31672	475470	478270	477200	1.29117	13.2935	3.73265	up
mws0214	C6H14O6	D-Sorbitol*	Others	Saccharides and Alcohols	50-70-4	3	26018	19864	30781	382990	393020	395500	1.28884	15.2813	3.9337	up
mws0133	C6H6N2O	Nicotinamide	Others	Vitamin	98-92-0	1	450660	508120	430990	6597200	6716700	7173900	1.29223	14.7419	3.88185	up
Lmbn000198	C4H6O5	3-Dehydro-L-Threonic Acid	Others	Saccharides and Alcohols	-	2	47124	44111	54273	2136100	2355600	2756800	1.29239	49.8151	5.63851	up
Zmjp000624	C8H9NO3	Pyridoxal	Others	Vitamin	66-72-8	3	75800	71338	73946	88771	99073	101310	1.22816	1.30789	0.387243	insig
Zmgn000173	C5H10O5	D-Ribose*	Others	Saccharides and Alcohols	50-69-1	3	36429	60336	48578	80810	79279	69826	1.0861	1.58188	0.661639	insig
pme3311	C6H14O12P2	D-Fructose-1,6-biphosphate	Others	Saccharides and Alcohols	488-69-7	3	96827	60803	86884	128230	117300	109240	1.0331	1.45092	0.536967	insig
pme0500	C18H32O16	D-Melezitose	Others	Saccharides and Alcohols	597-12-6	3	13359	8881.7	22642	15816	12715	22086	0.342384	1.12776	0.173463	insig
pmb2653	C24H42O20	D(+)-Melezitose O-rhamnoside	Others	Saccharides and Alcohols	-	3	8704.5	9583.2	12960	14864	9776.4	24358	0.734449	1.56806	0.648985	insig
mws2104	C7H14O6	D-Pinitol	Others	Saccharides and Alcohols	10284-63-6	3	10702	11383	8880.6	16497	19509	22030	1.21625	1.87421	0.906282	insig
Hmcn000192	C7H14O7	Sedoheptulose	Others	Saccharides and Alcohols	3019-74-7	3	291700	502340	358250	302590	303030	283310	0.76977	0.771446	-0.374362	insig
pme3005	C3H7NO	N,N-Dimethylformamide	Others	Others	25174	B	262480	9	9	9	254620	312170	0.435241	2.15925	1.11053	insig
Lmlp001319	C4H10O2	2,3-Butanediol	Others	Saccharides and Alcohols	513-85-9	B	27405	9	9	9	19268	20581	0.407601	1.45345	0.539483	insig
Lmbn002737	C8H8O	3-Methylbenzaldehyde	Others	Others	620-23-5	B	12604	9	9	9	17173	16394	0.453199	2.66012	1.41149	insig
mws0491	C8H11N	Phenethylamine	Others	Others	64-04-0	B	702600	9	9	9	773000	693980	0.433329	2.08789	1.06205	insig
mws0982	C6H11N3	1-Methylhistamine	Others	Others	501-75-7	B	18565	9	9	9	13318	10972	0.397253	1.30759	0.386914	insig
mws0889	C4H8O5	D-Threonic Acid	Others	Saccharides and Alcohols	734111	A	476380	9	9	9	529530	530520	0.436839	2.22515	1.15391	insig
ML10171848	C5H8O5	D-Arabinono-1,4-lactone	Others	Others	322392	A	221930	9	9	9	190590	184800	0.421573	1.69138	0.758203	insig
mws0213	C5H12O5	Ribitol	Others	Saccharides and Alcohols	488-81-3	B	22819	9	9	9	23619	21332	0.42999	1.96873	0.977269	insig
Zmzn000078	C3H7O6P	Dihydroxyacetone phosphate	Others	Saccharides and Alcohols	20915	B	17979	9	9	9	15991	23828	0.437345	2.21304	1.14603	insig
MA10039492	C6H6O6	Dehydroascorbic acid	Others	Vitamin	490-83-5	A	56000	9	9	9	57008	60791	0.434532	2.10304	1.07248	insig
pme1021	C6H10O6	D-Glucono-1,5-lactone	Others	Saccharides and Alcohols	90-80-2	B	44739	9	9	9	38695	39366	0.421904	1.74431	0.802655	insig
pme0516	C6H12O6	Inositol	Others	Saccharides and Alcohols	87-89-8	B	415170	9	9	9	462980	475850	0.437757	2.26124	1.17711	insig
pme0534	C6H12O7	Gluconic acid	Others	Saccharides and Alcohols	526-95-4	B	2614400	9	9	9	2692900	2653000	0.432251	2.04478	1.03195	insig
Zmzn000079	C4H9O7P	D-Erythrose-4-phosphate	Others	Saccharides and Alcohols	585-18-2	B	71797	9	9	9	80978	64449	0.431529	2.02515	1.01803	insig
mws4174	C8H15NO6	N-Acetyl-D-mannosamine	Others	Saccharides and Alcohols	7772-94-3	B	197650	9	9	9	180750	206970	0.430019	1.96152	0.971969	insig
mws0021	C14H12O3	Resveratrol	Others	Stilbene	501-36-0	B	3186.7	9	9	9	3308.8	2273.9	0.415781	1.74484	0.803098	insig
pma6455	C5H11O8P	Ribulose-5-phosphate	Others	Saccharides and Alcohols	4300-28-1	B	1072500	9	9	9	1092500	985810	0.429595	1.93779	0.954415	insig
Zmyn000110	C6H14NO8P	D-Glucosamine 1-phosphate	Others	Saccharides and Alcohols	2152-75-2	B	73545	9	9	9	65952	79578	0.430304	1.97843	0.984354	insig
mws1090	C6H13O9P	Glucose-1-phosphate	Others	Saccharides and Alcohols	59-56-3	B	13266000	9	9	9	12718000	13495000	0.430747	1.97595	0.982548	insig
Zmpn000095	C6H15O9P	Sorbitol-6-phosphate	Others	Saccharides and Alcohols	20479-58-7	B	74604	9	9	9	82431	92559	0.441168	2.34514	1.22967	insig
pmb1452	C16H35NO2	N-Lauryldiethanolamine	Others	Others	1541-67-9	B	26048	9	9	9	28207	23587	0.430443	1.98738	0.990866	insig
mws1038	C11H22N2O4S	Pantetheine	Others	Others	496-65-1	B	13128	9	9	9	12470	13565	0.430527	1.98113	0.986327	insig
pme2816	C20H28O2	4-Oxoretinol	Others	Vitamin	62702-55-0	B	45577	9	9	9	49361	48677	0.436111	2.15039	1.1046	insig
Hmyp002315	C15H10O7	3,5,7,4'-Tetrahydroxy-Coumaronochromone	Others	Others	-	A	34078	9	9	9	43432	42229	0.446815	2.51261	1.32919	insig
Hmdn001963	C14H10O8	Methyl Brevifolincarboxylate	Others	Others	154702-76-8	B	19329	9	9	9	24849	21213	0.443821	2.3813	1.25175	insig
MA10039641	C12H22O11	Lactobiose*	Others	Saccharides and Alcohols	63-42-3	A	147950	9	9	9	220750	165200	0.445893	2.6084	1.38316	insig
mws1080	C12H22O11	Galactinol	Others	Saccharides and Alcohols	3687-64-7	B	541370	9	9	9	534570	603400	0.433758	2.10197	1.07174	insig
mws5038	C12H22O11	Isomaltulose*	Others	Saccharides and Alcohols	13718-94-0	B	159250	9	9	9	144160	150570	0.426652	1.85059	0.887982	insig
mws5040	C12H21O11Na	Turanose	Others	Saccharides and Alcohols	547-25-1	B	1340400	9	9	9	1200500	1323200	0.428277	1.88278	0.912863	insig
pmn001400	C19H20O8	2,3,5,4'-Tetrahydroxystilbene-2-O-D-xyloside	Others	Stilbene	-	B	15015	9	9	9	9226.4	12530	0.404362	1.44784	0.533904	insig
HJN012	C20H26O7	4,7,9,9'-Tetrahydroxy-3,3'-dimethoxy-8-O-4'-neolignan	Others	Others	-	A	1796800	9	9	9	1751000	1657200	0.42871	1.8968	0.92357	insig
mws2523	C12H23O14P	Trehalose 6-phosphate	Others	Saccharides and Alcohols	4484-88-2	B	31703	9	9	9	28883	26987	0.422154	1.76158	0.816868	insig
HJN055	C21H24O10	Dihydrocharcone-4'-O-glucoside	Others	Others	-	A	11496000	9	9	9	11202000	11546000	0.430809	1.97877	0.984606	insig
Zmjn003358	C23H20O10	(-)-Epicatechin-3-(3''-O-methyl)gallate	Others	Others	-	B	179890	9	9	9	166900	168650	0.427176	1.86517	0.899307	insig
pme2125	C18H32O16	Raffinose*	Others	Saccharides and Alcohols	512-69-6	B	34250	9	9	9	29738	28381	0.419556	1.69628	0.762371	insig
pme2755	C8H15NO6	N-Acetyl-D-glucosamine*	Others	Saccharides and Alcohols	7512-17-6	3	2759800	2667100	2766000	261080	456270	297800	1.27788	0.123906	-3.01268	down
pme2596	C8H9NO4	4-Pyridoxic acid	Others	Vitamin	82-82-6	3	276250	275320	302580	76894	85071	72265	1.2886	0.274226	-1.86656	down
pme1383	C8H11NO3	Pyridoxine	Others	Vitamin	65-23-6	1	1826400	1701700	2116800	65982	92601	76242	1.2899	0.0415995	-4.58729	down
pmb0786	C6H13NO5	D-Glucosamine	Others	Saccharides and Alcohols	3416-24-8	3	2261500	3796700	2310600	21489	24609	27899	1.29011	0.00884201	-6.82141	down
mws2608	C8H15NO6	N-Acetyl-D-galactosamine*	Others	Saccharides and Alcohols	1811-31-0	3	1882000	1887500	1949400	112900	121670	121330	1.29329	0.0622322	-4.00619	down
mws1589	C18H32O16	D-Panose	Others	Saccharides and Alcohols	33401-87-5	3	16000	34936	23006	9931.5	9776.9	10366	1.14387	0.40673	-1.29786	down
mws1499	C5H10O5	D-Arabinose*	Others	Saccharides and Alcohols	10323-20-3	3	235130	220820	241860	87730	99317	80139	1.28104	0.382892	-1.38499	down
mws1337	C9H17NO5	D-Pantothenic Acid	Others	Vitamin	79-83-4	1	5301800	5094200	5193700	804500	807860	837730	1.29326	0.157161	-2.66969	down
pmf0256	C6H14O	3-Methyl-1-pentanol	Others	Saccharides and Alcohols	589-35-5	3	21218	16394	15623	9	9	9	1.29321	0.000507185	-10.9452	down
ML10175762	C8H8	Styrene	Others	Others	100-42-5	1	365240	288880	338240	9	9	9	1.29339	2.72079e-05	-15.1656	down
Lmbp000728	C8H8O	(S)-2-Phenyloxirane	Others	Others	20780-54-5	1	774360	679820	768780	9	9	9	1.29349	1.2146e-05	-16.3292	down
pme2134	C4H10O4	D-Threitol	Others	Saccharides and Alcohols	2418-52-2	3	160820	153360	220720	9	9	9	1.29305	5.04767e-05	-14.274	down
Lmbp000668	C6H5NO2	Isonicotinic acid*	Others	Vitamin	55-22-1	1	3645100	3741500	4024500	9	9	9	1.29355	2.36612e-06	-18.689	down
pme0490	C6H5NO2	Nicotinic acid (Vitamin B3)*	Others	Vitamin	59-67-6	1	3739600	3708300	3631300	9	9	9	1.2936	2.437e-06	-18.6465	down
MWSmce274	C7H8O2	Salicyl Alcohol	Others	Others	32880	3	58666	71093	67812	9	9	9	1.29351	0.00013666	-12.8371	down
MWS20172	C6H6O3	5-Hydroxymethylfurfural	Others	Others	67-47-0	3	218940	228290	222340	9	9	9	1.2936	4.03244e-05	-14.598	down
Zmdp000376	C5H11N3O	4-Guanidinobutanal	Others	Others	-	2	1736000	1489500	1483300	9	9	9	1.29354	5.73394e-06	-17.412	down
MWSmce701	C9H10O	4-Ethylbenzaldehyde	Others	Others	4748-78-1	2	86529	78831	87147	9	9	9	1.2935	0.000106928	-13.1911	down
pmb0764	C6H9NOS	4-Methyl-5-thiazoleethanol	Others	Others	137-00-8	2	2113600	1932800	2276600	9	9	9	1.29348	4.27012e-06	-17.8373	down
MWSslk226	C10H12O	Benzylacetone	Others	Others	2550-26-7	2	1285300	1272300	1357800	9	9	9	1.29355	6.89585e-06	-17.1458	down
MWSmce463	C10H12O	Mesitaldehyde	Others	Others	487-68-3	2	354360	387480	364430	9	9	9	1.2936	2.44063e-05	-15.3224	down
MWSmce199	C5H10O5	L-Xylose*	Others	Saccharides and Alcohols	609-06-3	3	262690	233860	249000	9	9	9	1.29353	3.62149e-05	-14.7531	down
pme2165	C5H4N2O4	Orotic acid	Others	Vitamin	65-86-1	3	38463	40016	55215	9	9	9	1.29292	0.000201954	-12.2737	down
pmf0175	C10H22O	2-Decanol	Others	Saccharides and Alcohols	1120-06-5	3	19524000	19712000	20233000	9	9	9	1.29358	4.54018e-07	-21.0707	down
pmf0174	C10H22O	1-Decanol	Others	Saccharides and Alcohols	112-30-1	3	21215000	20515000	22343000	9	9	9	1.29355	4.21394e-07	-21.1783	down
MWS0559	C6H10O5	1,6-anhydro-β-D-glucose	Others	Saccharides and Alcohols	498-07-7	3	23476	32942	40949	9	9	9	1.29244	0.000277301	-11.8163	down
MWSCX017	C9H8O3	4-hydroxyphenyl acrylaldehyde	Others	Others	-	2	208370	194910	160470	9	9	9	1.29353	4.78936e-05	-14.3498	down
mws0854	C6H12O5	Rhamnose	Others	Saccharides and Alcohols	3615-41-6	3	21430	27214	38139	9	9	9	1.29226	0.000311121	-11.6502	down
pmf0173	C10H22O2	1,2-Decanediol	Others	Saccharides and Alcohols	1119-86-4	3	62571	67927	69797	9	9	9	1.29354	0.000134801	-12.8569	down
mws4175	C6H8O6	D-Glucurono-6,3-lactone	Others	Saccharides and Alcohols	32449-92-6	3	7358.2	11917	12762	9	9	9	1.29199	0.00084277	-10.2126	down
pme2253	C6H10O6	L-Gulono-1,4-Lactone	Others	Saccharides and Alcohols	1128-23-0	2	214730	215170	217230	9	9	9	1.29358	4.17227e-05	-14.5488	down
pmf0138	C6H12O6	D-Mannose*	Others	Saccharides and Alcohols	3458-28-4	3	207460	156130	195260	9	9	9	1.29327	4.83135e-05	-14.3372	down
mws1164	C6H12O6	D-Fructose*	Others	Saccharides and Alcohols	7660-25-5	3	413030	518230	383160	9	9	9	1.29356	2.05414e-05	-15.5711	down
pmf0139	C6H12O6	D-Galactose*	Others	Saccharides and Alcohols	59-23-4	3	276010	235300	264410	9	9	9	1.29347	3.48064e-05	-14.8103	down
Hmln000297	C6H12O6	Inositol*	Others	Saccharides and Alcohols	87-89-8	3	305310	504280	355830	9	9	9	1.29327	2.31676e-05	-15.3975	down
Lmjp004702	C9H10O4	2',4'-Dihydroxy-6'-methoxyacetophenone	Others	Others	3602-54-8	3	16017	22235	24698	9	9	9	1.29279	0.000428912	-11.187	down
pmp001236	C11H10O4	Clove chromone	Others	Others	-	3	62705	70420	61494	9	9	9	1.29361	0.000138733	-12.8154	down
MWSslk174	C13H10O3	2,4'-Dihydroxybenzophenone	Others	Others	606-12-2	3	7069.8	5460.9	6553.3	9	9	9	1.29308	0.0014148	-9.46519	down
pme2266	C10H16N2O3S	Biotin	Others	Vitamin	58-85-5	1	119810	89593	90685	9	9	9	1.2933	8.99736e-05	-13.4401	down
mws1359	C16H16O3	Pterostilbene	Others	Stilbene	537-42-8	3	94008	84780	93354	9	9	9	1.2935	9.92129e-05	-13.2991	down
pme2289	C20H30O	Retinol (Vitamin A1)	Others	Vitamin	68-26-8	3	4175	2935.9	4456.7	9	9	9	1.29203	0.00233411	-8.74291	down
pme3163	C7H15O10P	D-Sedoheptuiose 7-phosphate	Others	Saccharides and Alcohols	2646-35-7	3	24242	30590	45021	9	9	9	1.29209	0.000270397	-11.8526	down
pmf0314	C20H34O	(+)-cis-Abienol	Others	Saccharides and Alcohols	17990-16-8	3	7577.3	4866.5	4963.3	9	9	9	1.29226	0.00155109	-9.3325	down
pmb3079	C8H16NO9P	N-Acetyl-D-glucosamine-1-phosphate	Others	Saccharides and Alcohols	6866-69-9	3	30185	40220	54331	9	9	9	1.29236	0.000216457	-12.1736	down
Lmsn000381	C12H22O11	D-Maltose*	Others	Saccharides and Alcohols	133-99-3	3	14606	11887	22547	9	9	9	1.29149	0.000550571	-10.8268	down
MWSslk074	C12H24O11	Lactitol	Others	Saccharides and Alcohols	585-86-4	2	7919100	7393100	6991000	9	9	9	1.29359	1.21059e-06	-19.6559	down
pmf0248	C27H46O2	Delta-Tocopherol	Others	Vitamin	119-13-1	3	5120.6	6038.5	5400.2	9	9	9	1.29354	0.0016305	-9.26047	down
MWSmce674	C31H46O2	Phylloquinone (Vitamin K1)	Others	Vitamin	84-80-0	2	52302	46529	48588	9	9	9	1.29352	0.000183151	-12.4147	down
MWS0442	C18H32O16	Maltotriose	Others	Saccharides and Alcohols	1109-28-0	2	62873	69298	90076	9	9	9	1.29307	0.000121486	-13.0069	down
Lmqn000213	C24H42O21	Stachyose	Others	Saccharides and Alcohols	470-55-3	3	7122.3	8450.3	6064.1	9	9	9	1.29332	0.00124788	-9.64631	down
mws1593	C24H42O21	D-Maltotetraose	Others	Saccharides and Alcohols	34612-38-9	3	25104	16684	2310	9	9	9	1.26727	0.000612273	-10.6735	down
MWSmce598	C30H52O26	Maltopentaose	Others	Saccharides and Alcohols	34620-76-3	3	14725	13964	10354	9	9	9	1.29321	0.000691545	-10.4979	down
pmp001285	C8H4O3	Phthalic anhydride	Phenolic acids	Phenolic acids	85-44-9	1	8088400	8986600	9085700	39350000	38709000	38780000	1.292	4.4662	2.15905	up
pmn001518	C13H16O10	1-O-Galloyl-D-glucose	Phenolic acids	Phenolic acids	58511-73-2	3	61690	27672	37120	315940	270340	264510	1.25703	6.72657	2.74987	up
pmn001419	C15H18O8	1-O-[(E)-p-Cumaroyl]-D-glucose	Phenolic acids	Phenolic acids	-	3	21076	30320	32647	286340	293860	303140	1.28527	10.5106	3.39377	up
pmf0440	C10H10O2	4-MethoxycinnaMaldehyde	Phenolic acids	Phenolic acids	1963-36-6	3	36308	34143	37276	324070	344850	351440	1.29316	9.47172	3.24363	up
pme0281	C8H6O4	Terephthalic acid	Phenolic acids	Phenolic acids	100-21-0	1	1013000	987050	1180000	4255800	4155000	4284600	1.29005	3.9922	1.99718	up
mws2212	C9H8O4	Caffeic acid	Phenolic acids	Phenolic acids	331-39-5	3	339820	431410	474310	1493700	1498600	1377200	1.27692	3.50812	1.8107	up
HJN037	C8H8O5	4-O-Methylgallic Acid	Phenolic acids	Phenolic acids	883555	3	22226	29684	41838	351240	353290	391670	1.28015	11.693	3.54758	up
pme3443	C11H12O4	Sinapinaldehyde	Phenolic acids	Phenolic acids	4206-58-0	2	82062	73063	63060	76444	77762	74838	0.424435	1.04977	0.0700728	insig
pme1439	C9H8O3	p-Coumaric acid	Phenolic acids	Phenolic acids	501-98-4	2	335560	341810	355710	163500	182590	190460	1.2792	0.519369	-0.945167	insig
pme0428	C12H14O5	3,4,5-Trimethoxycinnamic acid	Phenolic acids	Phenolic acids	90-50-6	3	4880.5	3841.4	5280.9	6394.5	5699.2	5840.6	1.01623	1.28077	0.357006	insig
mws4085	C11H12O5	Sinapic acid	Phenolic acids	Phenolic acids	530-59-6	1	71179	58719	55441	31835	36415	28026	1.23106	0.519459	-0.944918	insig
mws2368	C8H10O2	Tyrosol	Phenolic acids	Phenolic acids	501-94-0	1	26326	12007	18243	24941	20986	26922	0.690539	1.28763	0.364719	insig
mws1350	C9H10O4	Syringaldehyde; 4-Hydroxy-3,5-Dimethoxybenzaldehyde	Phenolic acids	Phenolic acids	134-96-3	2	134190	128280	121240	196070	169560	164430	1.20647	1.38141	0.466139	insig
mws0628	C7H6O2	4-Hydroxybenzaldehyde	Phenolic acids	Phenolic acids	123-08-0	1	1453500	627610	1135100	644580	636730	638740	0.870328	0.596991	-0.744218	insig
mws0093	C10H12O3	Coniferyl alcohol	Phenolic acids	Phenolic acids	458-35-5	3	27026	17297	38572	29177	27151	21038	0.0599569	0.933301	-0.0995854	insig
Lmmn001643	C9H8O3	2-Hydroxycinnamic acid	Phenolic acids	Phenolic acids	583-17-5	2	343150	254430	335360	648590	615400	585500	1.24418	1.98243	0.987271	insig
Lmlp012720	C16H22O4	Dibutyl phthalate*	Phenolic acids	Phenolic acids	84-74-2	1	2256400	2014600	2371900	1342800	1351400	1355900	1.26756	0.609689	-0.713856	insig
HJAP052	C10H12O4	2,4,5-Trimethoxybenzaldehyde	Phenolic acids	Phenolic acids	4460-86-0	3	53450	47317	52359	79971	75213	83958	1.26494	1.56173	0.643148	insig
mws1358	C6H6O2	Pyrocatechol	Phenolic acids	Phenolic acids	120-80-9	B	13729	9	9	9	10921	16336	0.429006	1.98341	0.987986	insig
Lmbn001930	C7H6O2	2-Hydroxybenzaldehyde (Salicylaldehyde)	Phenolic acids	Phenolic acids	32912	B	28923	9	9	9	22931	35697	0.430395	2.02609	1.0187	insig
ML10179289	C8H10O	2-Phenylethanol	Phenolic acids	Phenolic acids	22258	B	138350	9	9	9	116960	146590	0.427967	1.90477	0.929616	insig
mws0025	C6H6O3	Pyrogallol	Phenolic acids	Phenolic acids	87-66-1	B	26155	9	9	9	26124	21294	0.423597	1.81206	0.857629	insig
mws1503	C9H8O	Cinnamaldehyde	Phenolic acids	Phenolic acids	104-55-2	B	12950	9	9	9	12398	16502	0.439004	2.22926	1.15656	insig
Zmyn002919	C8H8O2	2-Methylbenzoic acid	Phenolic acids	Phenolic acids	118-90-1	B	3964.8	9	9	9	3719.9	2750.2	0.410049	1.62677	0.70201	insig
Hmbn002174	C8H8O2	4-Hydroxyacetophenone	Phenolic acids	Phenolic acids	99-93-4	A	87516	9	9	9	83001	110500	0.43685	2.21068	1.14449	insig
Lmgn001670	C7H6O3	Salicylic acid	Phenolic acids	Phenolic acids	69-72-7	A	344820	9	9	9	315730	289630	0.423994	1.75552	0.811896	insig
pme2828	C6H5NO3	4-Nitrophenol	Phenolic acids	Phenolic acids	100-02-7	B	2022000	9	9	9	2038300	1881700	0.429732	1.93866	0.955061	insig
Zmzn002575	C6H5NO3	2-Nitrophenol	Phenolic acids	Phenolic acids	88-75-5	A	630550	9	9	9	689760	659630	0.43469	2.13997	1.09759	insig
mws0183	C7H6O4	3,4-Dihydroxybenzoic acid (Protocatechuic acid)*	Phenolic acids	Phenolic acids	99-50-3	B	2100700	9	9	9	1986500	1713400	0.425113	1.76126	0.816607	insig
MA10040889	C6H5NO4	4-Nitrocatechol	Phenolic acids	Phenolic acids	517432	B	13488	9	9	9	13252	11878	0.425453	1.86132	0.896327	insig
pmb0142	C9H8O3	Caffeic aldehyde	Phenolic acids	Phenolic acids	141632-15-7	A	504890	9	9	9	483000	502940	0.429984	1.95273	0.965492	insig
Lmbn002739	C9H8O3	3-Hydroxycinnamic Acid	Phenolic acids	Phenolic acids	14755-02-3	A	1086400	9	9	9	1056700	985280	0.428133	1.87956	0.910396	insig
Zmjn002583	C8H8O4	2',4',6'-Trihydroxyacetophenone	Phenolic acids	Phenolic acids	480-66-0	B	32880	9	9	9	35167	29953	0.430256	1.97973	0.9853	insig
pme2598	C8H8O4	3,4-Dihydroxybenzeneacetic acid	Phenolic acids	Phenolic acids	102-32-9	B	262390	9	9	9	249650	226540	0.425671	1.81473	0.859753	insig
mws0160	C9H10O4	3,4-Dihydroxybenzoic Acid Ethyl Ester (Protocatechuic acid ethyl ester)	Phenolic acids	Phenolic acids	3943-89-3	B	8929	9	9	9	8701.8	8854	0.429823	1.96321	0.973211	insig
pmb2497	C9H10O5	4-Hydroxy-3-methoxymandelate	Phenolic acids	Phenolic acids	20369	B	23044	9	9	9	44488	34987	0.468323	3.44654	1.78515	insig
pme3472	C12H16O7	Arbutin	Phenolic acids	Phenolic acids	497-76-7	B	783800	9	9	9	685950	672660	0.423931	1.73333	0.79355	insig
Lmhn002926	C13H12O7	p-Coumaroylmalic acid	Phenolic acids	Phenolic acids	-	B	21028	9	9	9	19697	10132	0.399718	1.41775	0.503605	insig
mws2120	C13H8O8	Brevifolin carboxylic acid	Phenolic acids	Phenolic acids	18490-95-4	A	572700	9	9	9	707630	594600	0.437599	2.27379	1.1851	insig
Lmhn001386	C12H12O9	Vnilloyltartaric acid	Phenolic acids	Phenolic acids	-	B	6817.9	9	9	9	2853.6	6276.4	0.386637	1.33691	0.418905	insig
Zmhn001926	C13H16O8	1-O-Salicyl-D-glucose	Phenolic acids	Phenolic acids	60517-74-0	A	162260	9	9	9	149510	139450	0.424311	1.7807	0.832447	insig
pmb3142	C13H16O8	Salicylic acid-2-O-glucoside	Phenolic acids	Phenolic acids	10366-91-3	B	44198	9	9	9	39631	42553	0.426254	1.8589	0.894447	insig
Lmhn001477	C13H12O9	2-Caffeoyl-L-tartaric acid (Caftaric acid)	Phenolic acids	Phenolic acids	67879-58-7	B	38360	9	9	9	36722	33844	0.425355	1.83894	0.878878	insig
pmn001367	C13H16O9	Protocatechuic acid-4-O-glucoside*	Phenolic acids	Phenolic acids	-	A	238080	9	9	9	265650	253270	0.436036	2.17948	1.12398	insig
pmb2871	C13H16O9	2,5-Dihydroxybenzoic acid O-glucoside*	Phenolic acids	Phenolic acids	-	A	223360	9	9	9	224980	224350	0.431575	2.01156	1.00832	insig
Hmtn001120	C14H20O8	5-(2-Hydroxyethyl)-2-O-glucosylphenol	Phenolic acids	Phenolic acids	-	B	70317	9	9	9	60972	64578	0.423878	1.78516	0.836051	insig
pmb0751	C16H16O7	Trans-5-O-(p-Coumaroyl)shikimate	Phenolic acids	Phenolic acids	-	B	81926	9	9	9	89426	72505	0.430057	1.97623	0.982749	insig
Zmhn002301	C15H18O8	p-Coumaric acid-4-O-glucoside*	Phenolic acids	Phenolic acids	117405-48-8	A	223330	9	9	9	294080	267690	0.443937	2.51526	1.33071	insig
Zmlp005013	C16H10O8	3,3'-Dimethoxyellagic acid	Phenolic acids	Phenolic acids	-	B	16311	9	9	9	17359	19926	0.441177	2.28391	1.19151	insig
Zmhn001703	C13H16O10	5-O-Galloyl-D-hamamelose*	Phenolic acids	Phenolic acids	-	A	15021000	9	9	9	14938000	13444000	0.428878	1.88949	0.917994	insig
Hmln002806	C16H16O8	5-O-Caffeoylshikimic acid	Phenolic acids	Phenolic acids	180981-12-8	B	17121	9	9	9	12017	16074	0.41499	1.63954	0.713287	insig
pmn001421	C16H18O8	3-O-p-Coumaroylquinic acid	Phenolic acids	Phenolic acids	87099-71-6	A	47243	9	9	9	50996	45693	0.432643	2.04604	1.03284	insig
pma0149	C15H16O9	Sinapoyl malate	Phenolic acids	Phenolic acids	92344-58-6	B	126670	9	9	9	136180	118850	0.431455	2.01313	1.00944	insig
pmn001420	C15H18O9	1-O-[(E)-Caffeoyl]-D-glucose	Phenolic acids	Phenolic acids	-	A	347450	9	9	9	364310	356830	0.433248	2.07544	1.05342	insig
mws0906	C16H22O8	Coniferin	Phenolic acids	Phenolic acids	531-29-3	A	329810	9	9	9	362910	398620	0.438972	2.3089	1.2072	insig
pmp000261	C14H18O10	Methyl 6-O-galloyl-glucoside	Phenolic acids	Phenolic acids	-	B	10834	9	9	9	12446	6498.6	0.41498	1.74655	0.804511	insig
mws0748	C16H18O9	1-Caffeoylquinic acid	Phenolic acids	Phenolic acids	1241-87-8	A	64927	9	9	9	78294	78093	0.443067	2.40813	1.26791	insig
mws0178	C16H18O9	Chlorogenic acid	Phenolic acids	Phenolic acids	327-97-9	B	191440	9	9	9	169680	195250	0.428343	1.9061	0.930627	insig
pme1816	C16H18O9	Neochlorogenic acid(5-O-Caffeoylquinic acid)	Phenolic acids	Phenolic acids	906-33-2	A	244620	9	9	9	257260	262110	0.434595	2.12305	1.08614	insig
Zmhn002422	C16H20O9	1-O-Feruloyl-D-Glucose	Phenolic acids	Phenolic acids	-	B	15652	9	9	9	21343	22990	0.457009	2.82974	1.50067	insig
mws0179	C17H20O9	Chlorogenic acid methyl ester	Phenolic acids	Phenolic acids	29708-87-0	B	13195	9	9	9	19152	11653	0.440392	2.3321	1.22163	insig
pmb0752	C17H20O9	3-O-Feruloylquinic acid	Phenolic acids	Phenolic acids	1899-29-2	B	21197	9	9	9	21049	22863	0.433796	2.07028	1.04983	insig
pma3724	C17H20O9	1-O-Feruloylquinic acid	Phenolic acids	Phenolic acids	-	B	29799	9	9	9	30351	29393	0.431398	2.00399	1.00288	insig
pmn001695	C16H20O10	Trihydroxycinnamoylquinic acid	Phenolic acids	Phenolic acids	-	B	9578.7	9	9	9	8883.6	7791.4	0.419349	1.73851	0.797855	insig
Lmzn001582	C18H28O9	5'-Glucosyloxyjasmanic acid	Phenolic acids	Phenolic acids	-	B	32955	9	9	9	32348	38947	0.436427	2.1625	1.1127	insig
HJN093	C20H20O12	2-O-Salicyl-6-O-Galloyl-D-Glucose	Phenolic acids	Phenolic acids	-	A	230960	9	9	9	203960	226560	0.427176	1.86394	0.898355	insig
Zmhn004909	C21H18O13	3,4-Digalloylshikimic acid	Phenolic acids	Phenolic acids	-	A	916710	9	9	9	1385100	940100	0.441823	2.53642	1.34279	insig
pmn001526	C20H20O14	1,6-Di-O-Galloyl-D-Glucose*	Phenolic acids	Phenolic acids	-	A	572360	9	9	9	584200	597130	0.432879	2.06391	1.04538	insig
Lmgp003989	C25H22O11	Dicaffeoylshikimic acid	Phenolic acids	Phenolic acids	-	A	179020	9	9	9	163440	188220	0.430076	1.96421	0.973952	insig
Lmgp004518	C26H24O11	Caffeoylferuloylshikimic acid	Phenolic acids	Phenolic acids	-	B	6952.3	9	9	9	3312.1	4938.8	0.380996	1.18501	0.244904	insig
pmb3055	C22H26O14	p-Coumaroylquinic acid-4'-O-glucuronide	Phenolic acids	Phenolic acids	-	B	26631	9	9	9	28725	37711	0.446148	2.49334	1.31808	insig
Li512115	C25H24O12	Isochlorogenic acid B	Phenolic acids	Phenolic acids	14534-61-3	A	263400	9	9	9	226440	248040	0.425307	1.80128	0.849021	insig
pmn001382	C25H24O12	Isochlorogenic acid A	Phenolic acids	Phenolic acids	2450-53-5	B	274490	9	9	9	241270	227970	0.422357	1.70942	0.773505	insig
pmn001528	C28H18O17	Tetragallic Acid(3''-O-galloyl-4''-O-galloyl-4-O-galloyl-galloyl acid)	Phenolic acids	Phenolic acids	-	B	3076.4	9	9	9	4598.9	3104	0.450419	2.49221	1.31743	insig
pmn001534	C34H28O22	1,2,3,6-Tetra-O-Galloyl-D-Glucose	Phenolic acids	Phenolic acids	79886-50-3	A	113660	9	9	9	95007	84363	0.416363	1.57796	0.658058	insig
pmp000087	C13H16O6	2-Feruloyl-sn-glycerol	Phenolic acids	Phenolic acids	-	3	123580	107820	116370	47872	45441	42555	1.2854	0.390683	-1.35593	down
pmp000086	C13H16O6	1-Feruloyl-sn-glycerol	Phenolic acids	Phenolic acids	-	3	108390	78497	68742	40443	39219	42831	1.20825	0.479183	-1.06135	down
pmn001681	C10H14O2	1-(4-Methoxyphenyl)-1-propanol	Phenolic acids	Phenolic acids	5349-60-0	1	711920	738350	557640	26019	20937	27283	1.2904	0.0369733	-4.75737	down
pme2362	C8H8O3	Mandelic acid	Phenolic acids	Phenolic acids	90-64-2	3	12243000	9752000	12410000	26412	25034	27991	1.29282	0.00230888	-8.75859	down
pme0241	C7H6O2	Benzoic acid	Phenolic acids	Phenolic acids	65-85-0	1	1246600	1047100	1215300	230640	190970	259670	1.28225	0.194152	-2.36474	down
pmb2795	C10H10O3	4-Methoxycinnamic acid	Phenolic acids	Phenolic acids	830-09-1	3	17954	18181	22076	7436.4	6498.9	5588.4	1.2693	0.335395	-1.57607	down
pmb0069	C7H7NO	Benzamide	Phenolic acids	Phenolic acids	55-21-0	3	1014000	1251800	1189200	193240	169320	224750	1.28465	0.169988	-2.55649	down
mws2213	C9H8O2	Cinnamic acid	Phenolic acids	Phenolic acids	140-10-3	1	499830	529190	515320	3876.6	4401.4	4048.6	1.29348	0.00798179	-6.96907	down
mws1078	C7H7NO2	Anthranilic Acid	Phenolic acids	Phenolic acids	118-92-3	3	381390	376240	400320	84094	77075	79894	1.29227	0.208181	-2.26409	down
mws0749	C7H6O3	4-Hydroxybenzoic acid	Phenolic acids	Phenolic acids	99-96-7	2	12142000	11931000	12296000	1985000	1997500	1966100	1.29344	0.163562	-2.61209	down
mws0612	C10H12O4	3,4-Dimethoxyphenyl acetic acid	Phenolic acids	Phenolic acids	93-40-3	1	247680	222710	155450	49046	41246	46870	1.26943	0.219165	-2.18991	down
mws0458	C8H8O3	Vanillin	Phenolic acids	Phenolic acids	121-33-5	1	2799700	2763900	2785500	1036900	1084600	1105900	1.29242	0.386557	-1.37125	down
mws0444	C7H7NO3	3-Aminosalicylic acid	Phenolic acids	Phenolic acids	570-23-0	3	30723	28451	51143	24406	14859	13884	1.05485	0.481784	-1.05354	down
mws0182	C8H8O3	p-Hydroxyphenyl acetic acid	Phenolic acids	Phenolic acids	156-38-7	1	6112500	6147300	5348600	27809	37731	30306	1.29286	0.0054432	-7.52133	down
mws0028	C8H8O4	Vanillic acid	Phenolic acids	Phenolic acids	121-34-6	1	1086800	1306900	1146500	360890	243420	204110	1.25977	0.228354	-2.13065	down
mws0027	C9H10O5	Syringic acid	Phenolic acids	Phenolic acids	530-57-4	1	1716200	1489400	1009500	352970	371700	400080	1.25611	0.266838	-1.90596	down
mws0014	C10H10O4	Ferulic acid*	Phenolic acids	Phenolic acids	537-98-4	1	1548200	1263500	1305200	162010	191040	173120	1.2898	0.127807	-2.96796	down
mws0009	C10H10O3	Coniferaldehyde	Phenolic acids	Phenolic acids	20649-42-7	2	141890	136030	134670	10495	10281	14747	1.28736	0.0860976	-3.53788	down
Lmrn003000	C9H10O3	2-Hydroxy-3-phenylpropanoic acid	Phenolic acids	Phenolic acids	7326-19-4	2	230120	237500	250730	64197	56461	66571	1.28863	0.260638	-1.93988	down
Lmgn002679	C6H6O	Phenol	Phenolic acids	Phenolic acids	108-95-2	3	11986	12412	34408	5949	7707	3984.2	1.05112	0.299973	-1.7371	down
Hmtn001288	C9H10O4	Methyl 2,4-dihydroxyphenylacetate	Phenolic acids	Phenolic acids	67828-42-6	1	417840	486470	415170	64355	60183	55547	1.29119	0.136482	-2.87322	down
Hmgn001653	C7H6O3	Protocatechualdehyde*	Phenolic acids	Phenolic acids	139-85-5	1	8592800	8901500	8353500	1610600	1695400	1705400	1.29315	0.193881	-2.36676	down
Zmyn002321	C7H8O	4-Methylphenol	Phenolic acids	Phenolic acids	106-44-5	2	21659	28962	31595	9	9	9	1.29302	0.000328403	-11.5722	down
MWS2091	C8H10O	1-Phenylethanol	Phenolic acids	Phenolic acids	98-85-1	3	35241	39657	44212	9	9	9	1.29337	0.000226681	-12.107	down
NK10264324	C6H6O3	1,3,5-Benzenetriol	Phenolic acids	Phenolic acids	108-73-6	3	347920	315990	346840	9	9	9	1.29352	2.67128e-05	-15.1921	down
MWSmce466	C8H8O2	4'-Hydroxyacetophenone	Phenolic acids	Phenolic acids	99-93-4	1	1652400	1842100	1835000	9	9	9	1.29357	5.06614e-06	-17.5907	down
MWS2099	C8H8O2	4-Methylbenzoic acid	Phenolic acids	Phenolic acids	99-94-5	3	90788	68644	99678	9	9	9	1.29298	0.000104203	-13.2283	down
MWS1848	C8H8O2	Phenyl acetate	Phenolic acids	Phenolic acids	122-79-2	2	1695100	1329200	1785900	9	9	9	1.29331	5.61307e-06	-17.4428	down
mws1336	C7H7NO2	4-Aminobenzoic acid	Phenolic acids	Phenolic acids	150-13-0	3	57421	56834	38983	9	9	9	1.29325	0.000176197	-12.4705	down
Lmbn001981	C7H6O3	2,5-Dihydroxybenzaldehyde*	Phenolic acids	Phenolic acids	1194-98-5	1	5639000	5607200	5908100	9	9	9	1.29356	1.57395e-06	-19.2772	down
MWS1875	C10H8O	2-Naphthol	Phenolic acids	Phenolic acids	135-19-3	3	23103	24168	22806	9	9	9	1.29362	0.00038529	-11.3418	down
MWS2066	C10H8O	1-Naphthol	Phenolic acids	Phenolic acids	90-15-3	3	19757	21500	22158	9	9	9	1.29352	0.000425767	-11.1976	down
MWSmce573	C9H10O2	3,4-Dimethylbenzoic acid	Phenolic acids	Phenolic acids	619-04-5	3	8871.5	5592.3	7991.1	9	9	9	1.29217	0.00120241	-9.69986	down
mws0921	C9H10O2	p-Coumaryl alcohol	Phenolic acids	Phenolic acids	653915	3	20154	14964	20651	9	9	9	1.29288	0.00048414	-11.0123	down
MWSmce283	C9H10O2	4'-Hydroxypropiophenone	Phenolic acids	Phenolic acids	70-70-2	3	8357.2	5556.8	9216.5	9	9	9	1.29181	0.00116729	-9.74262	down
mws0008	C9H10O2	Hydrocinnamic acid	Phenolic acids	Phenolic acids	501-52-0	1	3805300	4132700	3963500	9	9	9	1.2936	2.26862e-06	-18.7498	down
MWSmce454	C8H8O3	3,5-Dihydroxyacetophenone	Phenolic acids	Phenolic acids	51863-60-6	2	62952	113640	81006	9	9	9	1.29289	0.000104814	-13.2199	down
MWS4301	C8H8O3	3-hydroxyphenylacetic acid	Phenolic acids	Phenolic acids	621-37-4	2	2234500	2214700	2322800	9	9	9	1.29356	3.98701e-06	-17.9363	down
MWS3149	C8H8O3	3-Methoxybenzoic acid	Phenolic acids	Phenolic acids	586-38-9	2	106920	102040	94215	9	9	9	1.29359	8.90575e-05	-13.4549	down
pme0221	C8H8O3	Methyl salicylate	Phenolic acids	Phenolic acids	119-36-8	3	10917	9382.2	17765	9	9	9	1.29128	0.000709328	-10.4613	down
MWS2058	C8H8O3	3-Methylsalicylic Acid	Phenolic acids	Phenolic acids	83-40-9	3	43871	46767	47982	9	9	9	1.29355	0.000194777	-12.3259	down
mws0145	C8H8O3	O-Anisic acid (2-Methoxybenzoic acid)	Phenolic acids	Phenolic acids	529-75-9	3	66777	80630	94017	9	9	9	1.2932	0.000111836	-13.1263	down
MWS1846	C8H8O3	Phenoxyacetic acid	Phenolic acids	Phenolic acids	122-59-8	3	124240	91532	103030	9	9	9	1.29328	8.46921e-05	-13.5274	down
MWS1734	C8H8O3	Anisic acid	Phenolic acids	Phenolic acids	100-09-4	3	32682	28261	39240	9	9	9	1.29303	0.000269507	-11.8574	down
MWSmce040	C8H8O3	Isovanillin	Phenolic acids	Phenolic acids	621-59-0	3	314470	362270	394730	9	9	9	1.29345	2.5199e-05	-15.2763	down
MWSmce713	C9H12O2	3-(4-Hydroxyphenyl)-1-propanol	Phenolic acids	Phenolic acids	10210-17-0	3	40646	54604	52578	9	9	9	1.29332	0.000182645	-12.4187	down
Lmgn002473	C7H6O4	2,6-Dihydroxybenzoic acid	Phenolic acids	Phenolic acids	303-07-1	3	107240	127040	118050	9	9	9	1.29356	7.66327e-05	-13.6717	down
MWSCX015	C9H8O3	(E)-3-(3,4-dihydroxyphenyl)acrylaldehyde	Phenolic acids	Phenolic acids	-	2	422070	399810	382540	9	9	9	1.29359	2.24174e-05	-15.445	down
mws0898	C10H12O2	Isoeugenol	Phenolic acids	Phenolic acids	97-54-1	3	16061	16634	16493	9	9	9	1.29359	0.000548914	-10.8311	down
pme3083	C8H7NO3	2-(Formylamino)benzoic acid	Phenolic acids	Phenolic acids	3342-77-6	3	1414000	1826600	1517200	9	9	9	1.29357	5.67489e-06	-17.427	down
mws0467	C9H10O3	3-(4-Hydroxyphenyl)-propionic acid	Phenolic acids	Phenolic acids	501-97-3	1	240090	303480	257420	9	9	9	1.29356	3.37083e-05	-14.8565	down
pme3381	C9H10O3	3-Hydroxyphenylacetic Acid Methyl Ester	Phenolic acids	Phenolic acids	42058-59-3	1	456490	524310	532120	9	9	9	1.29353	1.78463e-05	-15.774	down
MWS1830	C9H10O3	Ethylsalicylate	Phenolic acids	Phenolic acids	118-61-6	2	94462	73202	66461	9	9	9	1.29329	0.000115323	-13.082	down
MWS1839	C9H10O3	Ethylparaben	Phenolic acids	Phenolic acids	120-47-8	2	17079	15086	21518	9	9	9	1.29285	0.000502953	-10.9573	down
mws1382	C9H10O3	4'-Hydroxy-3'-methoxyacetophenone (Acetovanillone)	Phenolic acids	Phenolic acids	498-02-2	3	7083.2	10136	7674.2	9	9	9	1.29316	0.00108462	-9.84859	down
Lmbn005172	C9H10O3	2,6-Dimethoxybenzaldehyde	Phenolic acids	Phenolic acids	3392-97-0	1	221190	183260	226760	9	9	9	1.29336	4.2775e-05	-14.5129	down
NK10253223	C8H9NO3	2-Amino-3-methoxybenzoic acid	Phenolic acids	Phenolic acids	3177-80-8	3	60517	48235	58832	9	9	9	1.29329	0.000161113	-12.5996	down
MWS3136	C8H8O4	4-Methoxysalicylic Acid	Phenolic acids	Phenolic acids	2237-36-7	3	57439	40281	54035	9	9	9	1.29298	0.000177918	-12.4565	down
MWSslk149	C8H8O4	5-Methoxysalicylic acid	Phenolic acids	Phenolic acids	260088	2	29747	32192	20401	9	9	9	1.29309	0.000327909	-11.5744	down
MWSslk066	C8H8O4	3-Hydroxy-4-methoxybenzoic acid	Phenolic acids	Phenolic acids	645-08-9	3	308630	281240	325680	9	9	9	1.29347	2.94905e-05	-15.0494	down
MWS2009	C9H12O3	1,3,5-Trimethoxybenzene	Phenolic acids	Phenolic acids	621-23-8	3	13947	15965	15346	9	9	9	1.29354	0.00059658	-10.711	down
MWS2067	C12H10O	2-Phenylphenol	Phenolic acids	Phenolic acids	90-43-7	3	4854	5412.3	3165.7	9	9	9	1.29223	0.00201013	-8.9585	down
mws1195	C10H10O3	p-Coumaric acid methyl ester	Phenolic acids	Phenolic acids	3943-97-3	3	5395.5	13379	8054	9	9	9	1.29019	0.00100639	-9.95659	down
MWSmce001	C9H8O4	5-Acetylsalicylic acid	Phenolic acids	Phenolic acids	13110-96-8	3	49937	63808	55438	9	9	9	1.29351	0.000159591	-12.6133	down
MWS2070	C10H12O3	Propyl 4-hydroxybenzoate	Phenolic acids	Phenolic acids	94-13-3	2	412010	428210	439230	9	9	9	1.29357	2.11028e-05	-15.5322	down
MWSmce517	C11H16O2	Olivetol	Phenolic acids	Phenolic acids	500-66-3	3	32243	30072	29976	9	9	9	1.29357	0.000292553	-11.739	down
Hmcn006267	C9H10O4	2,6-Dimethoxybenzoic acid	Phenolic acids	Phenolic acids	1466-76-8	3	12924	16973	17071	9	9	9	1.2932	0.000574859	-10.7645	down
mws0117	C9H10O4	Homovanillic acid; 4-Hydroxy-3-methoxyphenylacetic acid	Phenolic acids	Phenolic acids	306-08-1	1	227850	176930	214100	9	9	9	1.29333	4.36272e-05	-14.4844	down
MWSmce455	C9H10O4	Vanillic acid methyl ester	Phenolic acids	Phenolic acids	3943-74-6	3	17505	15783	18640	9	9	9	1.29336	0.000519951	-10.9093	down
MWS5206	C9H10O4	Hydroxyphenyllactic acid	Phenolic acids	Phenolic acids	306-23-0	1	363480	392580	535180	9	9	9	1.29313	2.09101e-05	-15.5454	down
MA10002917	C6H4N2O5	2,4-Dinitrophenol	Phenolic acids	Phenolic acids	51-28-5	2	15593	19222	25501	9	9	9	1.29252	0.000447642	-11.1254	down
mws4171	C8H8O5	2,4,6-Trihydroxybenzoic acid methyl ester	Phenolic acids	Phenolic acids	3147-39-5	3	7378.6	9937	9955.9	9	9	9	1.29306	0.000990045	-9.98022	down
MWSslk097	C10H10O4	Dimethyl phthalate	Phenolic acids	Phenolic acids	131-11-3	3	45942	48626	53500	9	9	9	1.29346	0.000182349	-12.421	down
pme0422	C10H10O4	Isoferulic Acid*	Phenolic acids	Phenolic acids	537-73-5	1	1202200	1193600	1107000	9	9	9	1.29361	7.70812e-06	-16.9852	down
MWSmce632	C10H10O4	Vanillin acetate	Phenolic acids	Phenolic acids	881-68-5	2	26430	19153	21557	9	9	9	1.29312	0.000402145	-11.28	down
Hmmn004283	C10H12O4	Dihydroferulic Acid	Phenolic acids	Phenolic acids	1135-23-5	1	1913600	1860800	1798200	9	9	9	1.2936	4.84514e-06	-17.655	down
Lmln010063	C14H22O	2,6-Di-tert-butylphenol*	Phenolic acids	Phenolic acids	128-39-2	1	327990	243200	301600	9	9	9	1.29328	3.09353e-05	-14.9804	down
Lmbn013410	C14H22O	2,4-Di-Tert-Butylphenol*	Phenolic acids	Phenolic acids	96-76-4	1	348740	358140	335850	9	9	9	1.29361	2.58936e-05	-15.237	down
MA10107783	C10H8O5	3-[(1-Carboxyvinyl)oxy]benzoic acid	Phenolic acids	Phenolic acids	16929-37-6	3	15846	15217	29166	9	9	9	1.2912	0.000448289	-11.1233	down
pmb2620	C11H12O4	3,4-Dimethoxycinnamic acid	Phenolic acids	Phenolic acids	14737-89-4	3	4403	5320	4737.1	9	9	9	1.29349	0.00186721	-9.0649	down
pme3437	C10H12O5	Eudesmic acid (3,4,5-trimethoxybenzoic acid)	Phenolic acids	Phenolic acids	118-41-2	3	130200	106230	105370	9	9	9	1.29345	7.89936e-05	-13.6279	down
Lmxp011770	C16H22O4	Diisobutyl phthalate*	Phenolic acids	Phenolic acids	84-69-5	1	2462300	2256400	2382600	9	9	9	1.29355	3.80212e-06	-18.0048	down
MWSmce495	C15H22O5	Octyl gallate	Phenolic acids	Phenolic acids	1034-01-1	3	1236.3	1339.7	1274.7	9	9	9	1.29359	0.00701171	-7.15602	down
Cmzp002057	C14H18O8	6-O-Acetylarbutin	Phenolic acids	Phenolic acids	10338-88-2	3	23495	15850	23138	9	9	9	1.29261	0.000432118	-11.1763	down
Hmln000873	C13H16O10	2-O-Galloyl-D-glucose	Phenolic acids	Phenolic acids	-	3	76323	81586	64414	9	9	9	1.29357	0.000121445	-13.0074	down
Zmhn005413	C15H12O9	p-Dimeric galloyl methyl ester	Phenolic acids	Phenolic acids	-	3	18057	12434	21384	9	9	9	1.29204	0.000520482	-10.9079	down
MWSslk092	C18H16O7	Usnic acid	Phenolic acids	Phenolic acids	125-46-2	3	6094	6953.4	7689.2	9	9	9	1.29325	0.00130205	-9.585	down
Lmyp003381	C15H22O9	3,4,5-Trimethoxyphenyl-1-O-β-D-glucoside	Phenolic acids	Phenolic acids	-	2	12848	15690	15371	9	9	9	1.29342	0.000614908	-10.6673	down
pmb3062	C17H22O10	1-O-Eudesmoylquinic acid	Phenolic acids	Phenolic acids	-	3	12116	13319	11727	9	9	9	1.29361	0.000726549	-10.4267	down
pmn001707	C30H46O5	Quillaic acid	Phenolic acids	Phenolic acids	631-01-6	3	579910	540660	636170	9	9	9	1.29346	1.53694e-05	-15.9896	down
pmn001564	C25H30O11	Shomaside E	Phenolic acids	Phenolic acids	-	3	11586	9622.7	17898	9	9	9	1.29147	0.000690419	-10.5002	down
Zmlp007578	C17H12O8	3,3',4-O-Trimethylellagic acid	Tannins	Tannin	1617-49-8	3	7741	6451.1	7607.7	126130	140510	132020	1.29251	18.2873	4.19277	up
Hmln003405	C20H16O12	Ellagic acid-4-O-rhamnoside	Tannins	Tannin	-	1	120640	144530	151680	303560	312680	301390	1.27374	2.20134	1.13838	up
mws0024	C7H6O5	Gallic acid	Tannins	Tannin	149-91-7	A	81356000	9	9	9	76528000	72281000	0.428	1.82911	0.871141	insig
pme0309	C8H8O5	3-O-Methylgallic Acid	Tannins	Tannin	3934-84-7	A	204730	9	9	9	353250	265000	0.453383	3.01961	1.59436	insig
pme0310	C9H10O5	Ethyl gallate	Tannins	Tannin	831-61-8	B	22322	9	9	9	20658	20008	0.424291	1.82073	0.864513	insig
pme2246	C14H6O8	Ellagic acid	Tannins	Tannin	476-66-4	B	31344	9	9	9	27168	28675	0.422985	1.78088	0.832591	insig
pmn001513	C14H10O9	Digallic Acid	Tannins	Tannin	536-08-3	B	109030	9	9	9	108810	101160	0.428861	1.92556	0.945282	insig
Lmfn000604	C13H16O10	6-O-Galloyl-glucose*	Tannins	Tannin	13186-19-1	A	11145000	9	9	9	11548000	10487000	0.430705	1.97712	0.983399	insig
Lmfn001344	C20H20O13	Maplexin C (2,3-Di-O-Galloyl-1,5-Anhydro-D-Glucitol)	Tannins	Tannin	-	B	39478	9	9	9	43589	38291	0.433529	2.07335	1.05196	insig
Wmhn001495	C20H20O14	1,4-Di-O-galloyl-glcose*	Tannins	Tannin	-	A	1027200	9	9	9	964080	1007600	0.429207	1.91945	0.94069	insig
pme0434	C30H26O12	Procyanidin B2	Tannins	Proanthocyanidins	29106-49-8	A	1146800	9	9	9	1136700	1256800	0.433279	2.08709	1.06149	insig
pme0436	C30H26O12	Procyanidin B3	Tannins	Proanthocyanidins	23567-23-9	A	238180	9	9	9	215900	193040	0.422395	1.71684	0.77976	insig
mws0836	C30H26O12	Procyanidin B1	Tannins	Proanthocyanidins	20315-25-7	A	139220	9	9	9	186990	155370	0.443021	2.45888	1.298	insig
pmn001667	C30H26O12	Procyanidin B4	Tannins	Proanthocyanidins	29106-51-2	B	75679	9	9	9	91154	82348	0.439704	2.29218	1.19672	insig
pmp000275	C30H28O12	Gambiriin A1	Tannins	Tannin	76250-49-2	B	7550.6	9	9	9	6474	5226.6	0.408079	1.54713	0.629593	insig
Zmhn003541	C27H22O18	Gemin D	Tannins	Tannin	84744-46-7	A	330820	9	9	9	383290	454940	0.44377	2.53368	1.34124	insig
Lmfn001209	C27H24O18	1,3,6-Tri-O-galloyl-D-glucose	Tannins	Tannin	18483-17-5	B	50002	9	9	9	38365	37854	0.412648	1.52395	0.607816	insig
Lmhn002727	C37H29O16	(EC→EC)g(1)	Tannins	Proanthocyanidins	-	B	1051100	9	9	9	946610	816010	0.422272	1.67691	0.745804	insig
HJN094	C37H30O16	Galloylprocyanidin B4	Tannins	Proanthocyanidins	-	A	983350	9	9	9	1016000	1142000	0.435748	2.19451	1.1339	insig
Cmhn001369	C34H24O22	Casuariin	Tannins	Tannin	79786-04-2	A	18712	9	9	9	17099	17124	0.424451	1.82766	0.869995	insig
Lmsn002071	C34H26O22	Tellimagrandin I	Tannins	Tannin	79786-08-6	A	36198	9	9	9	34939	21896	0.411723	1.56958	0.650381	insig
pmn001647	C45H38O18	Procyanidin C2	Tannins	Proanthocyanidins	37064-31-6	A	63028	9	9	9	51154	53147	0.418721	1.65451	0.726401	insig
pmn001646	C45H38O18	Procyanidin C1	Tannins	Proanthocyanidins	37064-30-5	A	52045	9	9	9	51032	35689	0.417591	1.66587	0.736273	insig
Lmpp003705	C52H42O22	Procyanidin C1 3'-O-gallate	Tannins	Proanthocyanidins	-	A	96393	9	9	9	98818	99692	0.433055	2.05909	1.04201	insig
Lmqn004838	C15H8O8	3-O-Methylellagic acid	Tannins	Tannin	-	3	15806	7235.4	14931	9	9	9	1.28989	0.000711043	-10.4578	down
pmp000438	C30H50O2	Betulin	Terpenoids	Triterpene	473-98-3	3	5573.2	5866.3	8552.2	204410	196570	203220	1.29015	30.2225	4.91755	up
pmn001706	C30H48O4	2-Hydroxyoleanolic acid*	Terpenoids	Triterpene	26707-60-8	1	2613700	2852800	2942600	10548000	9983600	10515000	1.29142	3.69202	1.88441	up
mws4053	C30H48O3	Ursolic acid	Terpenoids	Triterpene	77-52-1	3	978760	987260	1032900	4262800	4162400	4644200	1.29228	4.35804	2.12368	up
Lmzn006284	C30H48O4	2α-Hydroxyursolic acid*	Terpenoids	Triterpene	-	2	1374300	1449400	1406400	8254700	7928800	7080000	1.29124	5.49952	2.4593	up
Lmmn004145	C38H60O10	3-O-(2-O-Acetyl-glucosyl)oleanolic acid	Terpenoids	Triterpene	-	3	2586.1	5317.4	3691.8	44417	51470	48722	1.27533	12.4713	3.64055	up
HJN110	C30H48O3	Betulinic acid	Terpenoids	Triterpene	472-15-1	2	116480	111190	102210	1526800	1642900	1801200	1.29219	15.0688	3.91349	up
Hmcp005697	C30H48O	δ-Amyrenone	Terpenoids	Triterpene	20248-08-2	B	31422	9	9	9	16868	26326	0.401843	1.37414	0.45853	insig
Lmzn206829	C30H46O3	Oleanonic acid	Terpenoids	Triterpene	17990-42-0	B	59626	9	9	9	53856	55707	0.425663	1.8371	0.87743	insig
Lmzn106829	C30H46O3	Betulonic acid	Terpenoids	Triterpene	4481-62-3	B	61646	9	9	9	54766	54556	0.423327	1.77301	0.826202	insig
pmn001700	C30H48O3	24,30-Dihydroxy-12(13)-enolupinol	Terpenoids	Triterpene	-	A	1763500	9	9	9	1557100	1555700	0.425301	1.76511	0.819761	insig
pmn001704	C30H46O4	2,3-Dihydroxy 5(6),12(13)diene ursolic acid	Terpenoids	Triterpene	-	A	12255	9	9	9	12334	11379	0.428499	1.93286	0.950738	insig
pmn001705	C30H48O4	3,24-Dihydroxy-17,21-semiacetal-12(13)oleanolic fruit	Terpenoids	Triterpene	-	B	2515100	9	9	9	2374400	2810600	0.432491	2.06154	1.04372	insig
Wmhn009757	C30H48O5	2α,3β,23-trihydroxy-12-ene-28-ursolic acid	Terpenoids	Triterpene	-	B	43658000	9	9	9	42613000	40932000	0.429578	1.91362	0.936307	insig
pmp000781	C39H54O6	p-Coumaroyleuscaphic acid	Terpenoids	Triterpene	-	B	9853.2	9	9	9	10466	11276	0.439189	2.20348	1.13978	insig
pmp000782	C39H54O7	Caffeoylhawthorn acid	Terpenoids	Triterpene	-	B	39780	9	9	9	37848	28448	0.417632	1.66604	0.736422	insig
Lmzn006829	C30H46O3	3-Ketoursolic acid	Terpenoids	Triterpene	-	3	222330	243100	225000	49925	51624	52515	1.29269	0.223142	-2.16397	down
Zmsp002526	C10H16O4	lactinolide	Terpenoids	Terpene	-	3	494500	556000	516870	9	9	9	1.2936	1.72263e-05	-15.825	down
Lmqn012798	C30H46O3	Urs-12(13)-en-3-one-28-oic acid	Terpenoids	Triterpene	-	2	326140	351900	316440	9	9	9	1.29362	2.71499e-05	-15.1687	down
MWSmce134	C30H46O3	Betulonic acid	Terpenoids	Triterpene	4481-62-3	3	336800	349680	338050	9	9	9	1.2936	2.63535e-05	-15.2116	down
Zmsp009163	C30H46O3	mudanpinoic acid A	Terpenoids	Terpene	203511-36-8	3	23211	23157	23036	9	9	9	1.29359	0.000389027	-11.3278	down
Zmjp013616	C30H50O3	12,13-Dihydroursolic acid	Terpenoids	Triterpene	-	3	8784.3	9362.9	10601	9	9	9	1.29334	0.000939189	-10.0563	down
Hmjn008136	C30H46O4	Camaldulenic acid	Terpenoids	Triterpene	71850-15-2	1	393450	362490	408900	9	9	9	1.2935	2.31791e-05	-15.3968	down
Zmcn009787	C30H46O4	Hederagonic acid	Terpenoids	Triterpene	466-01-3	1	28833	29921	28113	9	9	9	1.29362	0.00031082	-11.6516	down
pmp000441	C30H46O4	11-Keto-ursolic acid	Terpenoids	Triterpene	105870-59-5	2	19683	23910	21542	9	9	9	1.29353	0.000414524	-11.2363	down
Hmbn005207	C30H48O4	Hederagenin*	Terpenoids	Triterpene	465-99-6	1	1303400	1396900	1344000	9	9	9	1.2936	6.67606e-06	-17.1926	down
mws1557	C23H28O11	Paeoniflorin	Terpenoids	Monoterpenoids	23180-57-6	2	35260	37217	24134	9	9	9	1.29314	0.000279471	-11.805	down
pmp000444	C30H46O5	27,28-Dicarboxyl ursolic acid	Terpenoids	Triterpene	-	2	22573	9487.8	11785	9	9	9	1.29014	0.000615794	-10.6653	down
Lmsn011830	C30H46O5	2α,19α-Dihydroxy-3-oxours-12-en-28-oic acid	Terpenoids	Triterpene	176983-21-4	2	1950100	1570600	1659500	9	9	9	1.29349	5.21215e-06	-17.5497	down
Hmhn007817	C30H48O5	2α,3α-Dihydroxyursolic acid	Terpenoids	Triterpene	-	2	60260	61680	58959	9	9	9	1.29361	0.000149255	-12.7099	down
pmn001426	C30H48O5	Euscaphic acid	Terpenoids	Triterpene	53155-25-2	2	59294	51506	64134	9	9	9	1.29332	0.000154344	-12.6616	down
Smpn009230	C30H48O5	2α,3α,23-trihydroxyolean-12-en-28-oic acid	Terpenoids	Triterpene	-	2	24024000	25761000	22821000	9	9	9	1.29362	3.7187e-07	-21.3587	down
pmn001591	C30H48O5	Rutundic acid	Terpenoids	Triterpene	20137-37-5	2	15933	14695	24300	9	9	9	1.29215	0.000491553	-10.9904	down
Lmsn009900	C30H46O6	1β-Hydroxy-2-oxopomolic acid	Terpenoids	Triterpene	217466-37-0	1	4051.4	4090.3	4208.3	9	9	9	1.29356	0.00218623	-8.83734	down
Cmcp006262	C30H48O6	Roxburic Acid	Terpenoids	Triterpene	108657-25-6	2	10111	14165	9855.4	9	9	9	1.29317	0.00079106	-10.3039	down
Hmjp003546	C30H48O6	Madecassic acid	Terpenoids	Triterpene	18449-41-7	2	47160	51119	57224	9	9	9	1.29341	0.00017363	-12.4917	down
Hmln003398	C30H48O6	2α,3α,19α,23-Tetraydroxyurs-12-en-28-oic acid	Terpenoids	Terpene	-	1	52648	56714	62377	9	9	9	1.29345	0.000157215	-12.635	down

## Sheet: Table. S1-2
Table. S1-2 Carbohydrate content of aerial root mucilage and underground root exudate
Index	Compound	Class	URE-1	URE-2	URE-3	ARM-1	ARM-2	ARM-3	Pvalue	FoldChange	Log2FC	Type
Mal	Maltose	disaccharide	N/A	N/A	N/A	0.155	0.156	0.155	N/A	N/A	N/A	insig
Suc	Sucrose	disaccharide	N/A	N/A	N/A	1.33	1.17	0.905	N/A	N/A	N/A	insig
Tre	Trehalose	disaccharide	N/A	N/A	N/A	0.0459	0.0407	0.0339	N/A	N/A	N/A	insig
Ara	D-Arabinose	monosaccharide	0.00181391	0.0017661	0.00187541	N/A	N/A	N/A	N/A	N/A	N/A	insig
Fru	D-Fructose	monosaccharide	0.00135055	0.00129929	0.00121558	1.86	1.79	1.64	0.0013535639470514508	1368.5446859590936	10.418426827263426	up
Fuc	L-Fucose	monosaccharide	0.0101114	0.00736537	0.0067862	N/A	N/A	N/A	N/A	N/A	N/A	insig
Gal	D-Galactose	monosaccharide	N/A	N/A	N/A	0.0156	0.0157	0.0152	N/A	N/A	N/A	insig
Glu	Glucose	monosaccharide	0.00386768	0.00383896	0.00386566	3.34	3.53	3.4	2.688125474730556e-4	887.464030486593	9.793544837065062	up
Inositol	Inositol	monosaccharide	N/A	N/A	N/A	0.0638	0.0524	0.0481	N/A	N/A	N/A	insig
Rha	L-Rhamnose	monosaccharide	N/A	N/A	N/A	0.0151	0.0186	0.0176	N/A	N/A	N/A	insig
Sorbitol	D-Sorbitol	monosaccharide	N/A	N/A	N/A	0.0206	0.0259	0.028	N/A	N/A	N/A	insig
Xylitol	Xylitol	monosaccharide	0.00152619	0.00148724	0.00155114	N/A	N/A	N/A	N/A	N/A	N/A	insig
