# Supplementary material for: Microbiota-mediated nitrogen fixation and homeostasis in aerial root-mucilage
Source: Research Square preprint supplement (doi:10.21203/rs.3.rs-1761850/v1), 2022-06-24
Supplement: Supplementary file 3 [file c4abc8c649003dde517c894c.xlsx]

## Sheet: Sheet6
Table. S9 Record of mucilage production and meteorological factors
Time	Temperature-AV	Minimum humidity	Rainfall	Mucilage
2020-08-08	30.1	67	1	0.975
2021-06-25	23.85	87	13.2	0.966667
2020-08-09	32.1	67	0.2	0.954167
2020-08-07	25.5	91	72.2	0.925
2021-06-29	24.95	89	9.6	0.883333
2021-07-05	30.85	61	13.6	0.883333
2020-08-22	30.1	72	0.4	0.866667
2021-07-20	24.35	91	22.8	0.85
2021-07-01	24.65	94	15.4	0.841667
2021-07-03	28.55	68	0	0.841667
2021-04-06	18.4	94	29.2	0.825
2020-08-18	24.2	93	15.4	0.825
2021-06-28	28.9	75	1.4	0.825
2021-07-26	30.05	57	9.4	0.825
2021-06-24	27.05	80	2.4	0.816667
2021-07-19	24.75	89	21.8	0.816667
2021-05-25	27.05	68	0.4	0.808333
2020-08-11	25.75	83	14.8	0.808333
2021-06-11	24.95	80	7	0.808333
2021-07-04	32.95	56	0	0.8
2021-06-16	30.4	60	0	0.791667
2021-07-06	25.55	80	20	0.791667
2021-06-30	24.9	92	21.6	0.783333
2020-08-15	25.15	91	26.8	0.775
2020-08-25	27.95	73	2.2	0.775
2020-09-08	28.3	81	5.6	0.775
2021-07-29	27.2	81	35	0.775
2021-04-07	24.7	57	0	0.766667
2021-05-15	32.15	44	0.2	0.766667
2021-05-26	32.2	47	0.2	0.766667
2021-07-25	23.1	84	33	0.766667
2021-06-17	26.3	70	8.4	0.741667
2021-07-02	29.4	76	8.4	0.741667
2021-06-27	30.2	66	0	0.725
2021-06-10	28.65	72	0	0.725
2021-06-26	24.1	87	23.8	0.725
2021-06-18	30.8	61	10.8	0.691667
2020-08-12	27.35	84	0.4	0.683333
2021-06-23	31.65	61	3	0.675
2021-06-15	27.75	77	0.4	0.675
2021-07-07	31.25	50	0	0.675
2020-07-13	24.85	89	35.6	0.666667
2020-08-10	31.25	70	8.4	0.666667
2020-07-06	31.6	66	17.2	0.64
2021-04-08	30.45	44	0.2	0.633333
2021-06-09	26.3	79	4.2	0.633333
2021-07-18	27.95	73	1.4	0.633333
2020-08-13	30.5	67	0.6	0.625
2020-08-16	28.3	81	6.2	0.625
2020-08-20	27.95	69	39.8	0.625
2021-06-14	30.25	69	1.4	0.625
2021-07-30	30.1	72	0.2	0.625
2021-05-13	31.1	49	28.4	0.616667
2021-06-12	32.3	58	1.6	0.616667
2020-08-14	26.05	84	11	0.608333
2021-04-12	29.7	52	0.8	0.608333
2021-06-13	33.35	59	1.6	0.6
2020-08-06	27.25	85	6.8	0.591667
2020-07-14	31.15	51	0.2	0.580833
2021-05-12	32.65	47	0.2	0.575
2020-08-19	29.8	64	0	0.566667
2021-07-24	32.25	61	4.8	0.566667
2021-05-06	26.55	65	36.6	0.566667
2021-07-22	27.8	81	43.6	0.566667
2021-05-31	30.95	66	3	0.558333
2020-07-22	30.8	55	0.2	0.551667
2021-07-21	29	78	19.4	0.55
2020-08-05	30.55	75	11.6	0.504167
2021-07-23	31.95	63	8.4	0.483333
2020-07-21	29.35	71	1.6	0.458333
2020-09-24	26.1	83	13.2	0.45
2021-07-31	31.7	64	0	0.441667
2020-08-31	22.1	92	15.2	0.433333
2021-07-27	30.75	64	0	0.433333
2021-06-19	31.1	54	3	0.425
2020-08-17	24.4	92	26.2	0.416667
2021-02-08	14.75	93	78.4	0.416667
2021-07-28	30.5	63	4.2	0.416667
2020-07-18	30.6	68	36.4	0.366667
2021-07-11	31.85	55	0	0.358333
2020-09-05	31.65	59	0	0.325
2020-09-07	25.65	84	6	0.325
2021-07-09	25.85	78	25.4	0.325
2020-08-03	30.2	66	1.2	0.32
2021-07-08	30.6	71	10.6	0.316667
2020-10-20	21.5	91	8.2	0.3
2021-04-05	19.65	90	19.8	0.2925
2020-08-02	31.4	62	0	0.291667
2021-05-24	24	56	14	0.266667
2020-07-15	33.7	47	0	0.248333
2020-09-25	31.15	62	0	0.241667
2021-05-07	32.1	40	0	0.233333
2020-09-01	30.8	48	0.6	0.225
2020-09-11	27.3	80	9	0.225
2021-02-09	17.8	72	11.6	0.225
2020-08-30	30.5	69	15.2	0.175
2020-09-02	33.45	51	0	0.166667
2021-01-12	10	79	0.2	0.158333
2021-04-26	30.35	51	19	0.15
2021-04-04	23.15	67	0.2	0.141667
2021-05-14	31	52	2.2	0.141667
2020-10-16	26.05	81	0.6	0.133333
2020-10-21	23.15	86	0.6	0.125
2021-04-29	25.65	68	0.6	0.116667
2020-07-28	32.35	55	0	0.116667
2020-08-28	33.3	50	0.2	0.116667
2020-10-05	23.3	86	40	0.108333
2021-02-10	19.6	44	0	0.108333
2021-05-27	34.05	51	0	0.108333
2021-06-20	32.35	56	0	0.108333
2021-04-11	25.95	52	6.6	0.1
2020-08-04	30	71	23.6	0.0944444
2020-10-19	22.35	86	7.8	0.0666667
2021-05-05	29.35	43	3.8	0.0666667
2020-07-16	33.2	55	0	0.0625
2021-02-20	23.85	62	0	0.0583333
2021-07-12	33.9	47	0	0.05
2021-07-13	33.85	45	0	0.05
2021-07-14	32.15	53	0.6	0.05
2021-07-15	27.35	67	0	0.05
2021-07-16	31.4	48	0	0.05
2021-07-17	33.55	48	0	0.05
2020-08-27	34.2	49	0	0.05
2021-05-20	30.95	59	0	0.05
2021-07-10	30.55	56	0.2	0.05
2021-03-23	21.1	79	3.6	0.0416667
2021-05-04	35.4	36	0	0.0333333
2020-10-22	27.4	61	0.2	0.025
2020-10-30	24.35	86	1	0.025
2020-10-03	30.55	66	0	0.0181818
2020-10-15	24.25	85	2.2	0.0166667
2021-03-25	31.15	38	0	0.0166667
2021-04-27	32.75	46	0	0.0166667
2021-05-16	34.8	37	0	0.0166667
2020-07-31	32.7	56	6.2	0.0125
2020-08-01	31.8	53	1	0.0125
2021-03-24	28.2	54	0	0.0125
2020-07-27	23.65	86	40.6	0.00833333
2021-01-10	16.95	77	0	0.00833333
2021-01-11	13.05	80	2.6	0.00833333
2021-04-30	30.45	45	0	0.00833333
2021-05-10	24.75	61	4.6	0.00833333
2021-05-11	31.45	45	0.4	0.00833333
2021-05-21	35	46	0	0.00833333
2020-07-29	33.9	49	0	0.00666667
2021-04-09	32.95	33	0	0.00666667
2020-07-26	32.95	59	8.4	0.00416667
2020-07-17	32.4	55	0	0
2020-07-30	33.8	51	0	0
2020-08-29	33.5	57	0	0
2020-09-26	28.4	71	5.8	0
2020-09-27	31.45	61	0	0
2020-09-28	32.65	56	9.2	0
2020-09-29	34.1	54	0	0
2020-09-30	33.35	55	0	0
2020-10-01	32.95	56	0	0
2020-10-02	32.1	62	8.8	0
2020-10-04	30.2	71	9.2	0
2020-10-06	31.75	58	1.2	0
2020-10-07	32.65	52	0	0
2020-10-08	31	50	0	0
2020-10-09	31	48	0	0
2020-10-10	30.85	43	0	0
2020-10-11	30.7	45	0	0
2020-10-12	30.85	43	0	0
2020-10-13	31.25	44	0	0
2020-10-14	31.55	54	0	0
2020-10-17	27.25	64	0	0
2020-10-18	27.65	55	0	0
2020-10-23	29.25	39	0	0
2020-10-24	29.15	46	0	0
2020-10-25	30.5	42	0	0
2020-10-26	31.45	41	0	0
2020-10-27	29.95	51	0	0
2020-10-28	31.05	54	0	0
2020-10-29	26.45	76	0	0
2020-10-31	27.85	67	0	0
2020-11-01	28.45	63	0	0
2020-11-07	27.8	54	0	0
2020-11-08	28.95	50	0	0
2020-11-09	28.1	50	0	0
2020-11-10	28	46	0	0
2020-11-11	27.05	41	0	0
2020-11-12	28.1	47	0	0
2020-11-13	28.2	50	0	0
2020-11-14	27.2	45	0	0
2020-11-15	27.45	49	0	0
2020-11-16	26.2	70	0	0
2020-11-17	28	57	0	0
2020-11-18	29.05	51	0	0
2020-11-19	26.2	57	0	0
2020-11-20	26.75	56	0	0
2020-11-21	26.9	54	0	0
2020-11-22	27.85	51	0	0
2020-11-23	26.85	48	0.2	0
2020-11-24	28.5	51	0	0
2020-11-25	26.5	58	0	0
2020-11-26	27.2	50	0	0
2020-11-27	26.75	51	0	0
2020-11-28	26.9	46	0	0
2020-11-29	26.45	44	0	0
2020-11-30	25.65	47	0	0
2020-12-01	24.55	52	0	0
2020-12-02	25.8	54	0	0
2020-12-03	22.55	67	0	0
2020-12-04	21.15	67	0	0
2020-12-05	22.5	60	0	0
2020-12-06	25.95	50	0	0
2020-12-07	25.5	60	0	0
2020-12-08	24.85	59	0	0
2020-12-09	24.7	53	0	0
2020-12-10	25.25	57	0	0
2020-12-11	26.5	51	0	0
2020-12-12	25.05	58	0	0
2020-12-13	24.8	59	0.2	0
2020-12-14	25.8	56	0.2	0
2020-12-15	27.6	55	0	0
2020-12-16	28.15	57	0	0
2020-12-17	27.95	62	0.2	0
2020-12-18	27.7	56	0	0
2020-12-19	26.8	61	0	0
2020-12-20	18.2	62	0	0
2020-12-21	16.75	68	0	0
2020-12-22	17.05	59	0	0
2020-12-24	20.25	54	0	0
2020-12-25	20.15	56	0	0
2020-12-26	23.15	56	0	0
2020-12-27	23.9	60	0	0
2020-12-28	24.1	50	0.2	0
2020-12-29	24	43	0	0
2020-12-30	25.65	46	0	0
2020-12-31	19.35	69	0	0
2021-01-01	21.9	49	0	0
2021-01-02	22.5	48	0	0
2021-01-03	20.55	52	0.2	0
2021-01-04	23.5	49	0	0
2021-01-05	22.7	48	0.2	0
2021-01-06	22.3	51	0	0
2021-01-07	24.85	52	0.2	0
2021-01-08	21.25	74	0	0
2021-01-09	14.8	82	8	0
2021-01-13	14.1	59	0	0
2021-01-14	17.15	52	0	0
2021-01-15	18.45	55	0	0
2021-01-16	21.7	51	0.2	0
2021-01-17	23.55	56	0	0
2021-01-18	19.6	48	0	0
2021-01-19	21.3	47	0	0
2021-01-20	23.75	45	0	0
2021-01-21	23.6	36	0	0
2021-01-22	24.6	43	0	0
2021-01-23	23.45	51	0	0
2021-01-24	23.9	36	0	0
2021-01-25	23.4	36	0	0
2021-01-26	23.5	41	0	0
2021-01-27	24	43	0.2	0
2021-01-28	24.6	44	0	0
2021-01-29	26.5	52	0	0
2021-01-30	25.75	58	12.4	0
2021-01-31	25.25	42	0	0
2021-02-01	27.4	39	0	0
2021-02-02	28.75	31	0	0
2021-02-03	28.25	32	0	0
2021-02-04	28.75	31	0	0
2021-02-05	28.75	32	0	0
2021-02-06	27.5	43	0	0
2021-02-07	21.9	72	11	0
2021-02-11	25.2	40	0	0
2021-02-12	27	29	0	0
2021-02-13	28	39	0	0
2021-02-14	27.9	42	0	0
2021-02-15	28	44	0	0
2021-02-16	28.8	35	0	0
2021-02-17	28.4	45	0	0
2021-02-18	26.4	59	0	0
2021-02-19	21.55	67	8.8	0
2021-02-21	26.3	50	0	0
2021-02-22	27.75	29	0	0
2021-02-23	29.75	32	0	0
2021-02-24	30.6	37	0	0
2021-02-25	31.9	25	0	0
2021-02-26	30.15	31	0	0
2021-02-27	29.95	31	0	0
2021-02-28	29.5	27	0	0
2021-03-01	30.65	25	0	0
2021-03-02	28.9	30	0	0
2021-03-03	26.95	38	0	0
2021-03-04	29.95	32	0	0
2021-03-05	31.15	21	0	0
2021-03-06	29.15	24	0	0
2021-03-07	25.7	34	0	0
2021-03-08	28.3	29	0	0
2021-03-09	30.35	28	0	0
2021-03-10	29.75	29	0	0
2021-03-11	29.85	30	0	0
2021-03-12	30.25	27	0	0
2021-03-13	31.75	20	0	0
2021-03-14	30.05	30	0	0
2021-03-15	31.55	35	0	0
2021-03-16	33.3	27	0	0
2021-03-17	31.5	33	0	0
2021-03-18	31.3	37	0	0
2021-03-19	31.45	32	0	0
2021-03-20	31.25	30	0	0
2021-03-21	32.8	32	0	0
2021-03-22	27.2	63	0.8	0
2021-03-26	31.8	43	0	0
2021-03-27	33.65	25	0	0
2021-03-28	30.85	34	0	0
2021-03-29	30.8	37	0	0
2021-03-30	34.95	21	0	0
2021-03-31	32.75	30	0	0
2021-04-01	33.75	28	0	0
2021-04-02	35	23	0	0
2021-04-03	32.35	34	0	0
2021-04-10	34.45	35	0	0
2021-04-13	33.7	38	0	0
2021-04-14	31.1	43	0	0
2021-04-15	34.5	31	0	0
2021-04-16	34.95	27	0	0
2021-04-20	31.65	35	0	0
2021-04-21	35.65	24	0	0
2021-04-22	36.55	22	0	0
2021-04-23	37.1	27	0	0
2021-04-24	37.2	25	0	0
2021-04-25	33.75	44	0	0
2021-04-28	28.85	62	3.6	0
2021-05-01	27.5	66	0	0
2021-05-02	31.65	51	0	0
2021-05-03	34.05	39	6.8	0
2021-05-08	35.25	36	0	0
2021-05-09	35.45	34	0	0
2021-05-17	35.6	32	0	0
2021-05-18	36.25	41	0	0
2021-05-19	23.15	62	6.2	0
2021-05-22	37.1	36	0	0
2021-05-23	36.8	40	0	0
2021-05-28	34.3	43	0	0
2021-05-29	34.55	46	0	0
2021-05-30	33.3	55	0	0
2021-06-21	33.25	49	0	0
2021-06-22	34.45	48	0	0
