# Supplementary material for: Microbiota-mediated nitrogen fixation and homeostasis in aerial root-mucilage
Source: Research Square preprint supplement (doi:10.21203/rs.3.rs-1761850/v1), 2022-06-24
Supplement: Supplementary file 4 [file c908b43f3cbc5dcdb8da344d.xlsx]

## Sheet: High  concentrations
Table. S11-1 Mucilage compounds for anti-microbe activity test (High concentrations)
Compounds	Fungi			Bacteria
	F-XTBG 8	Hr-seed2	MF5	Mucilage	Air	HRS	Soil	DH-5α	10T-M-8	NoN-M-2-3	NoN-HRS-5	NoN-M-21-2
L-Tyrosine (5 mg/mL)	-	-	-	-	-	-	-	-	-	-	-	-
L-Proline (5 mg/mL)	-	-	-	-	-	-	-	-	-	-	-	-
L-Threonine (5 mg/mL)	-	-	-	-	-	-	-	-	-	-	-	-
L-tryptophan (5 mg/mL)	-	-	-	-	-	-	-	-	-	-	-	-
L-Valine (5 mg/mL)	-	-	-	-	-	-	-	-	-	-	-	-
Trans-4-Hydroxy-L-Proline (5 mg/mL)	-	-	-	-	-	-	-	-	-	-	-	+
3-Hydroxy-3-methylglutamic acid (5 mg/mL)	-	-	-	-	-	++	+	-	++	+	-	++
Epigallocatechin gallate (5 mg/mL)	-	-	-	-	+	++	++	-	++	++	-	-
Naringin (5 mg/mL)	-	-	-	-	-	-	-	-	-	-	-	-
Linolenic acid (5 mg/mL)	-	-	-	-	-	-	-	-	-	-	-	-
Choline (5 mg/mL)	-	-	-	-	-	-	-	-	+	-	-	-
Spermine (5 mg/mL)	-	++	-	+	-	+	+	++	+	+++	+	+++
Gallic acid (5 mg/mL)	-	-	-	-	+	+	+	+	++	++	+	+
Phthalic anhydride (5 mg/mL)	-	-	-	++	-	++	+	+	+	-	-	+
Epicatechin (2 mg/mL)	-	-	-	-	-	-	-	-	-	-	-	-
Quinic acid (2 mg/mL)	-	-	-	-	-	-	-	-	+	+	-	-
Note: +：d(Compound)/D(CK+)＞10%；++：d(Compound)/D(CK+)＞50%；+++：d(Compound)/D(CK+)＞80%；
Hr-seed2: Fusarium concentricum; MF5: Neopestalotiopsis aotearoa; DH-5α: Escherichia coli DH-5α; 10T-M-8, NoN-M-2-3, NoN-HRS-5 and NoN-M-21-2 isolates from mucilage sample.

## Sheet: Low  concentrations
Table. S11-2 Mucilage compounds for anti-microbe activity test (Low concentrations)
Compounds	Fungi			Bacteria
	F-XTBG8	Hr-seed2	MF2	Mucilage	Air	HRS	Soil	DH-5α	10T-M-8	NoN-M-2-3	NoN-HRS-5	NoN-M-21-2
3-Hydroxy-3-methylglutamic acid (50 μg/mL)	-	-	-	-	-	-	-	-	-	-	-	-
L-Tyrosine (50 μg/mL)	-	-	-	-	-	-	-	-	-	-	-	-
Epicatechin (50 μg/mL)	-	-	-	-	-	-	-	-	-	-	-	-
Epigallocatechin gallate (50 μg/mL)	-	-	-	-	-	-	-	-	-	-	-	-
Choline (50 μg/mL)	-	-	-	-	-	-	-	-	-	-	-	-
Spermine (50 μg/mL)	-	-	-	+	-	-	-	+	-	-	-	-
Phthalic anhydride (50 μg/mL)	-	-	-	-	-	-	-	-	-	-	-	-
Gallic acid (50 μg/mL)	-	-	-	-	-	-	-	-	-	-	-	-
Naringin (50 μg/mL)	-	-	-	-	-	-	-	-	-	-	-	-
Note: +：d(Compound)/D(CK+)＞10%；++：d(Compound)/D(CK+)＞50%；+++：d(Compound)/D(CK+)＞80%；
Hr-seed2: Fusarium concentricum; MF5: Neopestalotiopsis aotearoa; DH-5α: Escherichia coli DH-5α; 10T-M-8, NoN-M-2-3, NoN-HRS-5 and NoN-M-21-2 isolates from mucilage sample.

## Sheet: Metabolites Content
Table. S11-3 Concentration determination of candidate compounds in mucilage
Compounds	Detection platform	Concentration (ug·mL-1)
Epigallocatechin gallate	HPLC	0.1288
Spermine	HPLC	0.2488
Phthalic anhydride	UPLC-MS	NA
Gallic acid	UPLC-MS	0.416
